# Supplementary material for: ADP-ribose derived Nuclear ATP is Required for Chromatin Remodeling and Hormonal Gene Regulation (97 charact)
Source: bioRxiv or medRxiv preprint supplement (doi:10.1101/006593), 2014-06-25
Supplement: Supplementary file [file media-1.pdf]

## **Extended Data**

### **Extended Materials Methods**

#### **Cell culture; hormone and inhibitor treatment**

T47DM cells were used for all experiments unless otherwise stated. For hormone induction experiments, cells were grown in RPMI medium without Phenol Red, supplemented with 10% dextran-coated charcoal-treated FBS (DCC/FBS) after 24 h in serum-free conditions; cells were incubated with R5020 (10 nM) or vehicle (ethanol) as described (Vicent et al. 2011). For hormone induction experiments in MCF7 cells a similar procedure was performed; cells were grown in DMEM medium without Phenol Red, supplemented with 10% dextran-coated charcoal-treated FBS (DCC/FBS) after 24 h in serum-free conditions; cells were incubated with Estradiol (10 nM) or vehicle (ethanol). PARG and PARP inhibition were carried out via incubating cells with 5uM TA (tannic acid) or 10uM 3AB (3-amino-benzamide) respectively 1 hour prior to hormone treatment. All transfections were performed using Lipofectamine<sup>2000</sup> (Invitrogen) according to manufacturers instructions.

#### **PAR-capture ELISA**

Hormone and or inhibitor treatments were carried out as described, and sample preparation was carried out as follows: At the required time point, cells were washed twice with ice-cold PBS and scraped in lysis buffer (0.4 M NaCl, 1% Triton X-100) plus protease inhibitors. Cell suspensions were then incubated for 30 min on ice with periodic vortexing. The disrupted cell suspension was centrifuged at 10,000g for 10 min at 4°C, and the supernatant was recovered, snap-frozen, and stored at 80°C until required. Ninety-six-well black-walled plates were incubated with 2 ng/mL anti-PAR monoclonal antibody (Trevigen) in 50 mM sodium carbonate (pH 7.6) overnight at 4°C. The plates were washed once with PBS and blocked with blocking solution (5% semiskimmed milk powder, 0.1% Tween 20, 25 mM Tris at pH 7.4, 150 mM NaCl) for 1 h at room temperature. The plate was then washed four times in PBS and 0.1% Tween 20. One-hundred microliters of each sample (20 mg of total protein) or a PAR standard was applied and incubated for 1.5 h at room temperature. The plate was washed four times with PBS and 0.1% Tween 20 and incubated with anti-PAR rabbit

polyclonal antibody (Trevigen) for 1.5 h at room temperature. The plate was washed four times with PBS and 0.1% Tween 20 and incubated with anti-rabbit HRP conjugate secondary antibody (5% semiskimmed dried milk) for 1.5 h at room temperature. The plate was washed six times with PBS and 0.1% Tween 20, and PAR was identified via incubation with TACs Sapphire (Trevigen) for 10 min in the dark. The reaction was terminated with 5% phosphoric acid, and the absorbance at 450 nm and 520 nm was recorded.

### **NAD depletion assay**

T47D<sup>M</sup> cells were either left untreated or treated with the inhibitor indicated prior to R5020 addition as described. NAD concentration was determined as described (Wright et al 2012). At  $T = t$ , cells were washed with ice-cold PBS and incubated in 0.5 M PCA for 20 min on ice. An equal volume of KOH (1 M)/K<sub>2</sub>HPO<sub>4</sub> (0.33 M) (pH 7.0) was added, and the samples were vortexed and incubated for 20 min on ice. Samples were spun at 10,000 rpm for 2 min at 4°C, and the supernatant was stored at -20°C. The quantification of NAD was carried out as follows: Samples were added to an equal volume of reaction buffer (200 mM Bicine at pH 7.8, 1 mg/mL BSA, 1M EtOH, 10mMEDTA at pH 8.0, 4mM phenazine). One tenth of the reaction volume of alcohol dehydrogenase was added and incubated for 30 min at 30°C. The reaction was terminated with a 0.33 sample volume of 12 mM iodoacetate, and the absorbance at 570 nm was measured.

**Modelling and evaluation of the phosphorylated and unphosphorylated T45 NUDIX5 homodimer.** In order to mimic the phosphorylation in T45 of NUDIX5 homodimer, we modeled the mutant form T45D with MODELLER (Fischer et al 2003). The dimer structure of NUDIX5 was taken from the crystal 2DSC (Zhong et al 2006) deposited in the Protein Data Bank (Berman et al 2000) and used as template for modeling. We used MODELLER to generate, by simulated annealing and distance restraints, two sets of 500 conformations of the native and T45D mutant form of NUDIX5 homodimer. These sets respectively mimicked the homodimer interaction of the phosphorylated and non-phosphorylated forms of NUDIX5.

The comparison of the homodimer interaction, phosphorylated and non-phosphorylated, was performed using the docking score potential of ZRANK (Pierce et al 2007). We calculated the distribution of the scores of docking of both sets.

**Chromatin Immunoprecipitation (ChIP) in cultured cells.** ChIP assays were performed as described (Vicent et al 2009) using the H2A specific antibody (Cell Signaling Technologies), or the H1 antibody (AE4 abcam). Quantification of chromatin immunoprecipitation was performed by qRT-PCR and the fold enrichment of target sequences in the immunoprecipitated (IP) compared to input (I) fractions were calculated using the comparative Ct method with ( $2^{\text{Ct(IP)}-\text{Ct(Ref)}}$ ). Values were corrected by the human b-globin gene and referred as relative abundance over time zero. Primers sequences are available on request

**RNA interference experiments.** All siRNAs were transfected into the T47D<sup>M</sup> cells using Lipofectamine 2000 (Invitrogen) as described (Vicent et al 2009). siRNA are sequences available on request.

**RNA extraction and RT-PCR.** Total RNA was prepared and cDNA generated as previously described (Wright et al. 2012). Quantification of gene products was performed by qRT-PCR. Each value calculated using the standard curve method was corrected by the human GAPDH and expressed as relative RNA abundance over time zero. Primer sequences are available on request.

**Protein Extract Preparation, western blotting/Co-immunoprecipitation assay.** Cells were prepared as previously described (Wright et al 2012), briefly cells were lysed (1% NP40, 150mM NaCl, 50mM Tris-HCl) and following total protein quantification, 2mg of cell extracts were incubated with protein G/A agarose beads previously coupled with 5µg of the corresponding antibodies or an unspecific control antibody as described (Vicent et al. 2009). Inputs and immunoprecipitated material was analyzed by western blot using; PARP1 (Cell Signalling technologies), PARG (Abcam ab169639), PAR (trevigen) and NUDIX5 (abcam) specific antibodies.

**Immunofluorescence.** T47D<sup>M</sup> or MCF7 cells were grown on coverslips treated with hormone for the desired length of time as described in previous sections prior to fixation using 4% paraformaldehyde in PBS for 15 min and permeabilized with PBS

0.2% Triton X-100 at room temperature. Coverslips were blocked with 5% skim-milk for 1 h at room temperature and incubated 2 hours with primary antibodies diluted in PBS 1% skim-milk at 1/500 PAR monoclonal and or polyonal (trevigen), 1/1000 (PARP1 (Cell Signalling technologies), or 1/500 anti-phospho Serine 118 ER, anti-luciferase (Sigma L0159). After washes with PBS Tween 20 0.05%, samples were incubated with secondary antibodies (AlexaFluor 555 anti-rabbit and AlexaFluor 488 anti-mouse, Invitrogen-Molecular Probes) for 1 h at room temperature. After washes with PBS Tween 0.05% and DNA staining with DAPI, samples were mounted with mowiol. Images were acquire with a Leica TCS SP5 CFS confocal microscope.

**Microarray Design and Procedure.** The levels of NUDIX5 were reduced in T47D<sup>M</sup> cells using siRNA as described or the activity of PARP and PARG were inhibited by treating T47D<sup>M</sup> cells with either treated with 3AB or TA respectively. As a control, T47D<sup>M</sup> cells were treated with solvent (EtOH alone) prior to R5020 induction for 0 or 6 hours as described above. Total RNA was prepared and cDNA generated as described. Independently generated biological replicates hybridised against the human whole genome 44K expression platform (Agilent). Significantly induced, or repressed genes were considered as those with a log<sub>2</sub> fold of  $\geq 1.5$  and  $\leq -1.5$  respectively and a q value of  $\leq 5.00$ .

**Site directed mutagenesis and detection of Myc-NUDIX5 phosphomimetic constructs for expression in mammalian cells.** Site-directed mutagenesis was carried out on the wild-type human PARP1 fused to Myc (pCMV-Myc NUDT5; genescript) as directed in the Quick Change mutagenesis kit. The mutagenic primers were as follows 5'-3'; T45D Fw; TGTACGTTTCACTGATTCCCAATCTCTAGTTTTACCAGTAGGATCC, T47D Rv; GGATCCTACTGGTAAACTAGAGATTGGGAATCAGTGAAACGTACA. Following the mutagenesis procedure, mutations were confirmed by sequencing. Myc-wtNUDIX5 or Myc-NUDIX5-Thr/Asp mutant plasmids were transfected into T47D<sup>M</sup> cells using Lipofectamine 2000 (Invitrogen) as described. 48 hours later, cells were treated with hormone, cell proliferation, and gene or protein expression determined as described above.

### **Cell proliferation assay**

T47D<sup>M</sup> / MCF7 cells transfected with control, NUDIX5 siRNAs or treated with the inhibitors 3AB/tannic acid as described above. Cells ( $1 \times 10^4$ ) were plated in a 96-well plate in the presence or absence of R5020 (T47D<sup>M</sup>) or estradiol (MCF7). The cell proliferation ELISA BrdU Colorimetric assay (Roche) was performed according to the manufacturer's instructions. The experiments were performed in triplicate.

### **Purification of Recombinant NUDT5 in vitro**

Recombinant NUDIX5 was produced using 1-step Human high yield in vitro mammalian translation (IVT) system (Thermo Scientific). Briefly, IVT reactions containing (HeLa cell lysate, accessory proteins, reaction mix, 4ug NUDIX5 DNA (pANT7 GST-NUDT5 (DNASU, plasmid depository)) in 100ul was dialysed for 16 hours at 30°C according to manufacturers instructions. Recombinant NUDIX5 was then purified from the total reaction using GST beads (as described Wright et al 2012).

### **DNA damage; Cell Survival Assay**

MCF7 cells were transfected with control, NUDIX5 siRNAs or treated with the inhibitors 3AB/tannic acid as described above. Cells were then plated in a 100mm plates at varying concentrations and subjected to DNA damage (H<sub>2</sub>O<sub>2</sub>) at varying concentrations (0.1, 0.2, 0.5mM). The medium was replaced every 3 days and the resultant surviving colonies stained using crystal violet solution (0.5% crystal violet, 10% methanol). Data is represented as a percentage surviving fraction compared to control (undamaged).

### **PAR Mass Spec Peptide Enrichment analysis**

T47D cells were treated with hormone or ethanol for 30 minutes and the resultant lysates were immunoprecipitated using anti-PAR antibody. Immunoprecipitated peptides were digested with trypsin and 1ug of each sample were analyzed by LCMSMS using a MEDI\_CID method in the LTQ Orbitrap XL. To avoid carry over, samples were injected in increasing amount and BSA controls were included both in the digestion

and LCMSMS analysis for quality control. Samples were searched against SwissProt\_Human (January 2013) using an internal version of the search algorithm Mascot (<http://www.matrixscience.com/>). Data analysis was performed with Proteome Discoverer v1.3. Peptides have been filtered based on the FDR (False Discovery rate) for peptides with FDR better (lower) than 5%. Protein Discoverer gives an approximate estimation of protein amount with the parameter “Area” which is the average peak area of the 3 top peptides for a given protein. Immunoprecipitation was performed in two independent experiments for both control and hormone treated samples and the relative fold change compared to control was determined using the average area for the two experiments.

### **Real time ATP visualisation using ATeam probes following hormone**

T47D cells were transfected with either Nuclear (Nuc) / Mitochondrial (Mito) or Cytoplasmic (Cyto) targeted A-team constructs in 35mm diameter cell culture plates using lipofectamine 2000 (Roche, following manufacturers instructions). 24 hours prior to hormone treatment cells were serum starved (RPMI 0% FCS, minus phenol red). For each individual experiment, 4 fields of view were selected containing between 2-5 cells/view. R5020 was added directly at the microscope prior to YFP and CFP emission detection at 1 minute intervals for the length of time required at selected FOV. For analysis; multiple regions of interest (ROI) of equal size were selected from each individual cell imaged and the ratio for each region of interest (ROI) was calculated following background subtraction according to protocol detailed in Kardash *et al.*, 2011. Results are represented as the mean +/-SEM of multiple ROIs.

### **ATP visualisation using Bioluminescence Imaging**

T47D or MCF7 cells were seeded in RPMI or DMEM media respectively, as described above in black walled 96 well plates, were transfected using lipofectamine 2000 (Invitrogen, as described above) with the luciferase constructs (Nuc/Cyto/Mito-luciferase) as required, at a concentration of 50ng DNA/well. 24 hours prior to imaging the cells were starved with 0% FCS. R5020 or 17-estradiol were added as

described above for the length of time prior to the addition of 100ul of D-luciferin (1mg/ml, Sigma). The relative amounts of ATP were then visualised and quantitated using bioluminescence imaging IVIS system (Xenogen Corp).

### **Solexa ChIP-seq analysis**

DNA was subjected to deep sequencing using the Solexa genome analyzer (Illumina Hi-Seq 2000). Single-ended sequences were trimmed to 50 bp and mapped to the human genome assembly hg19 using Bowtie (<http://bowtie-bio.sourceforge.net>), an ultrafast short-read mapping program (Langmead et al. 2009), keeping only tags that mapped uniquely and with no more than two mismatches.

### **Peak detection and annotation analysis**

The integrated software Macs (Zhang et al. 2008) was used to detect peaks that were enriched from background reads. The algorithm was applied by using the sliding window method to count the reads using the “nomodel” option, shift size set to 75, tag size set to 50, and a P-value threshold of  $1 \times 10^{-3}$  settings for transcription factors and chromatin remodelers; BPTF, HP1y, PARP1, CDK2, CTCF, PR, and PolIII to identify differential binding between the two conditions by treating the T0 of the samples as the control. In the case of histone modifications, the algorithm was applied using “nomodel,” “nolambda,” and a P-value threshold of  $1 \times 10^{-3}$ . In order to perform the average profiles, we used R programming language for plotting the mapped read signals over the regions of interest. All of the genome-wide annotations and statistics of protein–DNA interaction patterns from ChIP-seq data were performed with the standalone application CEAS (Cis-regulatory Element Annotation System). In the case of the ChIP-seq PR data, the signals of treated and untreated samples were compared using Poisson analysis (P-value < 0.001) (Ballare et al. 2013).

### **GO Biological Process and Pathway Analysis**

GO biological process and pathway analysis was performed using MSigDB Collections database v4 gene set enrichment analysis online tools using a significance cut off value of  $p < 0.05$ .

## Extended References

- Berman, H.M. *et al.* The Protein Data Bank. *Nucleic Acids Res* **28**, 235-242 (2000).
- Fiser, A., Do, R.K. & Sali, A. Modeling of loops in protein structures. *Protein Sci* **9**, 1753-1773 (2000).
- Pierce, B. and Weng, Z. (2007) ZRANK: reranking protein docking predictions with an optimized energy function. *Proteins*, **67**, 1078–1086.
- Tao Ye, Arnaud R. Krebs, Mohamed-Amin Choukrallah, Celine Keime, Frederic Plewniak, Irwin Davidson, and Laszlo Tora. 2011. seqMINER: an integrated ChIP-seq data interpretation platform. *Nucleic Acids Res.* 2011 39: e35
- Vicent, G.P. *et al.* 2009 Two chromatin remodeling activities cooperate during activation of hormone responsive promoters. *PLoS Genet* **5**, e1000567 (2009).
- Vicent, G.P. *et al.* 2011 Four enzymes cooperate to displace histone H1 during the first minute of hormonal gene activation. *Genes Dev* **25**, 845-862.
- Wright, R. H. G. *et al* 2012. CDK2-dependent activation of PARP-1 is required for hormonal gene regulation in breast cancer cells. *Genes Dev* **26**:1972-1983
- Zha, M., Zhong, C., Peng, Y., Hu, H. and Ding, J. (2006) Crystal structures of human NUDT5 reveal insights into the structural basis of the substrate specificity. *J. Mol. Biol.*, **364**, 1021–1033.
- Zhang, Y. *et al.* Model-based analysis of ChIP-Seq (MACS). *Genome Biol* **9**, R137 (2008).

## Extended Tables

**Extended Table 1: Peptide Enrichment Before and after Hormone following ADPR enrichment.** Table lists accession number; description, and the peptide enrichment score for 2 independent experiments (A, B; hormone treated T30 and C, D Control T0) as described in methods above), results are represented as a  $\log_2(\text{ratio})$  Hormone (T30)/Control (T0).

**Extended Table 2: PAR Mass Spec Functional Groups.** Table lists accession number; description, and the peptide ratio (hormone/control) for functionally related groups of proteins; histones, kinases, phosphatase and enzymes involved in NAD, ADPR metabolism and ATP synthesis.

**Extended Table 3: GO Biological Function Analysis Control (T0) PAR Mass Spec.** Significant ( $p < 0.05$ ) GO biological processes enriched using proteins identified in control (T0) PAR mass spec analysis.

**Extended Table 4: GO Biological Function Analysis Control (T30) PAR Mass Spec.** Significant ( $p < 0.05$ ) GO biological processes enriched using proteins identified in control (T30) PAR mass spec analysis.

**Extended Table 5: GO Biological Function Analysis for Genes Dependent on Nudix5.** Significant ( $p < 0.05$ ) GO biological processes enriched using genes identified as Nudix5 dependent (Figure 4A).

**Extended Table 6: GO Biological Function Analysis for Genes Independent on Nudix5.** Significant ( $p < 0.05$ ) GO biological processes enriched using genes identified as Nudix5 independent (Figure 4A).

**Extended Table 7: Pathway Analysis (KEGG/REACTOME for Genes Dependent or Independent on Nudix5.** Significant ( $p < 0.05$ ) pathways enriched using genes identified as Nudix5 dependent or independent (Figure 4A).



Extended Table 1

| Accession | Description                                                                                             | Area      |           |           |           | log (area) |           |           |           | Hormone | Control | Hormone/Control |
|-----------|---------------------------------------------------------------------------------------------------------|-----------|-----------|-----------|-----------|------------|-----------|-----------|-----------|---------|---------|-----------------|
|           |                                                                                                         | Hormone_1 | Hormone_2 | Control 1 | Control 2 | Hormone_1  | Hormone_2 | Control 1 | Control 2 |         |         |                 |
|           |                                                                                                         | A3: Area  | B3: Area  | C3: Area  | D3: Area  | A3: Area   | B3: Area  | C3: Area  | D3: Area  |         |         |                 |
| P5385     | ATP synthase subunit e, mitochondrial OS=Homo sapiens GN=ATP5E PE=1 Sv=2 - [ATP5E_HUMAN]                | 1.9797    | 2.2697    | 7.296     | 7.356     | 7.326      | 7.323     | 7.323     | 7.323     | 4       | 4.326   |                 |
| C9Y92     | Uncharacterized protein OS=Homo sapiens GN=HNRPL PE=4 Sv=1 - [C9Y92_HUMAN]                              | 2.1037    | 2.1037    |           |           | 7.323      | 7.094     | 7.323     | 7.323     | 4       | 4.323   |                 |
| Q12738    | Skeletal alpha-2 casein, desialylated OS=Homo sapiens GN=HDHL PE=1 Sv=2 - [N]                           | 1.6567    | 1.2417    |           |           | 7.336      | 7.094     | 7.336     | 7.211     | 4       | 4.215   |                 |
| P04792    | Heat shock protein beta-1 OS=Homo sapiens GN=HSPB1 PE=1 Sv=2 - [HSPB1_HUMAN]                            | 1.3729    | 1.1097    |           |           | 7.140      | 7.140     | 7.140     | 7.140     | 3       | 4.140   |                 |
| U01561    | Acyl carrier protein, mitochondrial OS=Homo sapiens GN=NDUFA1 PE=1 Sv=3 - [ACPM_HUMAN]                  | 1.2087    | 1.4127    |           |           | 7.082      | 7.150     | 7.082     | 7.116     | 3       | 4.116   |                 |
| E9FE4     | Uncharacterized protein OS=Homo sapiens GN=DLAT PE=3 Sv=1 - [E9FE4_HUMAN]                               | 1.3897    | 1.0437    |           |           | 7.143      | 7.018     | 7.143     | 7.080     | 3       | 4.080   |                 |
| D6A32     | Uncharacterized protein OS=Homo sapiens GN=MAP1B PE=4 Sv=2 - [D6A32_HUMAN]                              | 1.1927    | 1.1927    |           |           | 7.076      | 7.076     | 7.076     | 7.076     | 3       | 4.076   |                 |
| Q9D9F5    | Isomorf 5 of Serine RNA effector nucleoside diphosphate kinase OS=Homo sapiens GN=SRRT_HUMAN            | 3.5427    | 5.4305    |           |           | 7.503      | 7.045     | 7.503     | 7.345     | 3       | 4.345   |                 |
| P5CYG9    | Uncharacterized protein OS=Homo sapiens GN=AP2B1 PE=4 Sv=1 - [P5CYG9_HUMAN]                             | 1.3077    | 9.3276    |           |           | 7.116      | 6.972     | 7.116     | 7.044     | 3       | 4.044   |                 |
| Q9UN52    | COP3 signalosome complex subunit 3 OS=Homo sapiens GN=COP3 PE=1 Sv=3 - [C3N3_HUMAN]                     | 1.2097    | 8.4486    |           |           | 7.082      | 6.927     | 7.082     | 7.005     | 3       | 4.005   |                 |
| A3K11     | Exosome component 2 (Fragment) OS=Homo sapiens GN=EXOSC2 PE=4 Sv=1 - [A3K11_HUMAN]                      | 9.3186    | 6.9369    |           |           | 6.969      | 6.969     | 6.969     | 6.969     | 3       | 3.969   |                 |
| E9FK3     | Uncharacterized protein OS=Homo sapiens GN=CPNE3 PE=4 Sv=1 - [E9FK3_HUMAN]                              | 1.2367    | 6.3856    |           |           | 7.090      | 6.822     | 7.090     | 6.956     | 3       | 3.956   |                 |
| E9K28     | Protein In-7 homolog C OS=Homo sapiens GN=LIN7C PE=1 Sv=1 - [LIN7C_HUMAN]                               | 1.1017    | 7.9566    |           |           | 7.001      | 6.900     | 7.001     | 6.945     | 3       | 3.945   |                 |
| Q9NUP9    | Palmitoyl transferase 1 OS=Homo sapiens GN=PPT1 PE=1 Sv=1 - [PPT1_HUMAN]                                | 1.1547    | 6.3336    |           |           | 7.062      | 6.802     | 7.062     | 6.932     | 3       | 3.932   |                 |
| P50897    | Uncharacterized protein OS=Homo sapiens GN=C12orf10 PE=4 Sv=1 - [F6VR8_HUMAN]                           | 7.9666    | 6.901     |           |           | 6.901      | 6.901     | 6.901     | 6.901     | 3       | 3.901   |                 |
| R6A22     | Outamer protein complex, subunit beta 2 (beta prime), isoform CRA_D OS=Homo sapiens GN=COPB2 PE=2       | 1.3227    | 4.0375    |           |           | 7.121      | 6.606     | 7.121     | 6.864     | 3       | 3.864   |                 |
| Q12554    | Proteinase isozyme chaperone OS=Homo sapiens GN=HSPD2 PE=2 Sv=2 - [HSPD2_HUMAN]                         | 1.3037    | 5.9965    |           |           | 7.087      | 6.817     | 7.087     | 6.819     | 3       | 3.819   |                 |
| Q16851-2  | Isomorf 2 of UTP-glucose-1-phosphate uridylyltransferase OS=Homo sapiens GN=UGP2 - [UGPA_HUMAN]         | 1.2097    | 3.2826    |           |           | 6.984      | 6.516     | 6.984     | 6.750     | 3       | 3.750   |                 |
| F5H170    | Uncharacterized protein OS=Homo sapiens GN=DNAAF4 PE=4 Sv=1 - [F5H170_HUMAN]                            | 5.54556   |           |           |           | 6.744      |           | 6.744     | 6.744     | 3       | 3.744   |                 |
| Q92799-3  | Isomorf 3 of Symplekin OS=Homo sapiens GN=SYMVK - [SYMVK_HUMAN]                                         | 5.45556   |           |           |           | 6.737      |           | 6.737     | 6.737     | 3       | 3.737   |                 |
| O95182    | NADH dehydrogenase [ubiquinone] L1 alpha subcomplex subunit 7 OS=Homo sapiens GN=NDUFA7 PE=1 Sv=        | 7.8465    | 2.8176    |           |           | 6.895      | 6.450     | 6.895     | 6.672     | 3       | 3.672   |                 |
| Q9D9F5-5  | Isomorf 5 of Protein transferase OS=Homo sapiens GN=SEC31A - [SEC31A_HUMAN]                             | 7.5405    | 1.7096    |           |           | 6.877      | 6.233     | 6.877     | 6.521     | 3       | 3.521   |                 |
| R4GLG2    | Uncharacterized protein OS=Homo sapiens GN=ZC3H1A PE=2 Sv=1 - [R4GLG2_HUMAN]                            | 3.31156   | 5.34165   | 11.4465   | 6.521     | 5.728      | 5.059     | 6.521     | 5.393     | 1       | 1.127   |                 |
| Q31ZD1    | Uncharacterized protein OS=Homo sapiens GN=ARPC3 PE=4 Sv=1 - [Q31ZD1_HUMAN]                             | 5.0336    |           |           |           | 7.700      |           | 7.700     | 7.700     | 0.998   |         |                 |
| Q99497    | Protein DJ-1 OS=Homo sapiens GN=PAK7 PE=1 Sv=2 - [PAK7_HUMAN]                                           | 5.2398    | 3.3898    | 5.50767   | 6.14987   | 8.719      | 8.530     | 7.741     | 7.789     | 8.625   | 7.765   |                 |
| Q9NUP9-2  | Isomorf 2 of Protein kinase C and cAMP kinase substrate OS=Homo sapiens GN=PKCBL1 - [NM1T1_HUMAN]       | 1.4682    | 6.41116   | 1.41556   | 7.164     | 6.807      | 6.507     | 7.164     | 6.985     | 6.151   | 6.834   |                 |
| Q9P10     | NADH dehydrogenase [ubiquinone] L1 alpha subcomplex subunit 3 OS=Homo sapiens GN=NDUFA3 PE=1 S          | 1.3857    | 1.21527   |           |           | 7.142      | 7.085     | 7.142     | 7.085     | 6.329   | 6.249   |                 |
| Q9C836    | Scavenger mRNA-decapping enzyme Dcp5 OS=Homo sapiens GN=DPCS PE=1 Sv=2 - [DPCS_HUMAN]                   | 1.3037    | 2.4776    |           |           | 7.115      | 6.394     | 7.115     | 6.394     | 0.721   |         |                 |
| Q31B13    | Uncharacterized protein OS=Homo sapiens GN=PSPH PE=4 Sv=1 - [Q31B13_HUMAN]                              | 9.83556   | 6.4035    | 6.9931    | 6.943     | 5.806      | 6.797     | 6.993     | 6.502     | 6.017   | 6.056   |                 |
| Q8WMM7-6  | Isomorf 6 of Ataxin-2-like protein OS=Homo sapiens GN=ATXN2 - [ATXN2_HUMAN]                             | 2.79567   | 7.91226   | 2.8546    | 3.7856    | 7.448      | 6.898     | 7.448     | 6.578     | 1.772   | 1.512   |                 |
| P07355    | Isomorf 5 of OS=Homo sapiens GN=ANKK2 PE=1 Sv=1 - [ANKK2_HUMAN]                                         | 1.21347   | 9.73165   | 4.0255    | 7.549     | 7.337      | 6.898     | 7.443     | 6.898     | 6.791   | 6.652   |                 |
| P36871    | Phosphoglucomutase-1 OS=Homo sapiens GN=PGM1 PE=1 Sv=3 - [PGM1_HUMAN]                                   | 1.8277    | 4.4256    | 1.5336    | 6.3416    | 7.198      | 6.974     | 6.185     | 6.802     | 6.086   | 6.404   |                 |
| P90V0     | Uncharacterized protein OS=Homo sapiens GN=CPTH PE=3 Sv=1 - [E9PDV0_HUMAN]                              | 1.5767    | 7.5226    | 3.2205    | 7.261     | 6.889      | 6.508     | 7.075     | 6.508     | 0.567   |         |                 |
| F5H8D7    | Uncharacterized protein OS=Homo sapiens GN=XRCCL1 PE=4 Sv=1 - [F5H8D7_HUMAN]                            | 5.2446    | 1.4666    |           |           | 6.720      | 6.166     | 6.720     | 6.166     | 0.553   |         |                 |
| Q8M1F7    | Nuclear pore complex protein NuP93 OS=Homo sapiens GN=NUP93 PE=1 Sv=2 - [NUP93_HUMAN]                   | 1.9437    |           | 3.7626    | 7.128     | 7.128      | 7.710     | 6.856     | 6.575     | 7.128   | 6.575   |                 |
| Q31E0     | Uncharacterized protein OS=Homo sapiens GN=HNF1A - [Q31E0_HUMAN]                                        | 1.6988    | 7.1276    |           |           | 7.028      | 6.710     | 7.028     | 7.369     | 6.823   | 6.546   |                 |
| F5H3H2    | Uncharacterized protein OS=Homo sapiens GN=PKL PE=4 Sv=1 - [F5H3H2_HUMAN]                               | 2.0077    |           | 5.7326    | 7.303     | 7.303      | 7.140     | 6.856     | 6.788     | 6.788   | 6.544   |                 |
| Q92922    | SWI/SNF complex subunit SMARCC1 OS=Homo sapiens GN=SMARCC1 PE=1 Sv=3 - [SMRCC1_HUMAN]                   | 2.6967    | 7.9605    | 6.3576    | 7.431     | 6.901      | 6.527     | 7.431     | 6.930     | 7.166   | 6.639   |                 |
| Q6K537    | 4.1G isoform OS=Homo sapiens GN=EPH4L1 PE=2 Sv=1 - [Q6K537_HUMAN]                                       | 1.8617    | 8.7186    | 3.9836    | 3.6976    | 6.940      | 6.600     | 6.940     | 6.584     | 7.105   | 6.584   |                 |
| Q8R8W7-2  | Isomorf 2 of Cdk5 cyclin dependent kinase 2 OS=Homo sapiens GN=CDK5 - [CDK5_HUMAN]                      | 1.3397    | 9.2706    | 3.3566    | 7.127     | 6.967      | 6.526     | 6.789     | 7.047     | 6.526   | 6.521   |                 |
| P20492    | Isomorf 2 of salivary T alpha-untilated sequence 1 OS=Homo sapiens GN=STAF1 PE=1 Sv=2 - [STAF1_HUMAN]   | 1.7526    | 1.8937    | 1.73465   | 6.761     | 6.748      | 6.239     | 6.748     | 6.239     | 6.629   | 6.372   |                 |
| Q9Y650    | Cytoskeletal dynein 1 light intermediate chain 1 OS=Homo sapiens GN=DNVLC1L1 PE=1 Sv=3 - [DC11L1_HUMAN] | 1.2827    | 7.3756    | 1.4576    | 3.7076    | 6.868      | 6.163     | 6.868     | 6.868     | 6.386   | 6.502   |                 |
| Q9YK70    | Protein CDV3 homolog OS=Homo sapiens GN=CDV3 PE=1 Sv=1 - [CDV3_HUMAN]                                   | 6.6567    | 2.2917    | 6.6886    | 1.9707    | 7.823      | 7.360     | 6.886     | 6.795     | 5.920   | 5.801   |                 |
| Q9C677    | Coiled-coil domain-containing protein 12A OS=Homo sapiens GN=CCDC124 PE=1 Sv=1 - [CC124_HUMAN]          | 1.9077    | 3.3246    | 1.1247    | 6.126     | 7.280      | 6.522     | 7.051     | 7.280     | 6.786   | 6.494   |                 |
| P30419-2  | Isomorf 2 of Glyoxalase II N-tetradecanoyltransferase 1 OS=Homo sapiens GN=NMT1 - [NMT1_HUMAN]          | 1.45457   | 1.6087    | 2.62126   | 1.91067   | 7.162      | 7.206     | 6.418     | 6.963     | 7.184   | 6.691   |                 |
| A6M8N     | Adrenomedullin OS=Homo sapiens GN=ADM - [ADM_HUMAN]                                                     | 3.1867    | 1.4383    | 1.9246    | 7.244     | 7.244      | 7.244     | 7.244     | 7.244     | 6.716   | 6.662   |                 |
| R4D31     | Uncharacterized protein OS=Homo sapiens GN=NDP51 PE=2 Sv=1 - [R4D31_HUMAN]                              | 1.7367    | 7.3476    | 4.2866    | 3.2746    | 7.240      | 6.865     | 6.632     | 6.515     | 7.053   | 6.574   |                 |
| AM8UN4    | Uncharacterized protein OS=Homo sapiens GN=ATP6V1 PE=2 Sv=1 - [AM8UN4_HUMAN]                            | 7.5445    | 5.0765    | 2.1986    | 6.884     | 6.741      | 6.342     | 6.812     | 6.342     | 0.470   |         |                 |
| AM6M8     | ARD1 homolog A, N-acetyltransferase (S. cerevisiae), isoform CRA_D OS=Homo sapiens GN=NAO1 PE=4 Sv      | 2.8077    | 6.9636    | 4.1836    | 5.51226   | 7.458      | 6.843     | 6.621     | 6.741     | 7.150   | 6.681   |                 |
| B1A49     | Tubulin tyrosine ligase-like family, member 12 OS=Homo sapiens GN=TLTL2 PE=1 Sv=1 - [B1A49_HUMAN]       | 1.3297    | 4.1356    |           |           | 7.123      | 6.655     | 7.123     | 6.655     | 0.469   |         |                 |
| Q9LCA2    | Uncharacterized protein OS=Homo sapiens GN=GNAN3 - [Q9LCA2_HUMAN]                                       | 2.3557    | 2.5257    | 2.1947    | 7.402     | 7.402      | 7.341     | 7.371     | 7.371     | 6.224   | 6.224   |                 |
| P35659    | Protein DEK OS=Homo sapiens GN=DEK PE=1 Sv=1 - [DEK_HUMAN]                                              | 2.2867    | 1.5017    | 4.8965    | 6.2765    | 7.359      | 7.176     | 6.690     | 6.942     | 2.668   | 2.668   |                 |
| Q9YK8     | 28S ribosomal protein S26, mitochondrial OS=Homo sapiens GN=MRPS26 PE=1 Sv=1 - [MRPS26_HUMAN]           | 7.2426    | 2.0866    | 6.860     | 6.860     | 6.319      | 6.517     | 6.860     | 6.418     | 4.452   | 4.452   |                 |
| Q41396    | Thioredoxin-like protein 1 OS=Homo sapiens GN=TXNL1 PE=1 Sv=3 - [TXNL1_HUMAN]                           | 1.8137    | 6.8006    | 5.37116   | 7.258     | 6.928      | 6.730     | 7.258     | 6.817     | 6.441   | 6.441   |                 |
| Q12347-3  | Isomorf 3 of Serine/arginine-rich splicing factor 6 OS=Homo sapiens GN=SRSF6 - [SRSF6_HUMAN]            | 5.6317    | 1.9007    | 1.8326    | 8.4496    | 7.751      | 7.279     | 7.205     | 6.927     | 7.515   | 7.077   |                 |
| P11413    | Glucocorticoid-inducible protein 1 OS=Homo sapiens GN=IGFBP1 PE=1 Sv=1 - [IGFBP1_HUMAN]                 | 1.8927    | 6.6565    | 1.73465   | 7.277     | 7.277      | 7.091     | 7.277     | 7.091     | 6.844   | 6.844   |                 |
| AMZ71     | Uncharacterized protein OS=Homo sapiens GN=COX7A2 PE=4 Sv=1 - [AMZ71_HUMAN]                             | 3.9567    | 2.9517    | 9.6326    | 1.5777    | 7.556      | 7.470     | 6.984     | 7.198     | 7.513   | 7.091   |                 |
| Q9N06     | Uncharacterized protein OS=Homo sapiens GN=BZWI PE=4 Sv=1 - [Q9N06_HUMAN]                               | 6.0906    | 6.0795    | 2.0446    | 6.959     | 6.959      | 6.784     | 6.310     | 6.959     | 6.422   | 6.422   |                 |
| P86821-2  | Isomorf 2 of U1 small nuclear ribonucleoprotein 70 kDa OS=Homo sapiens GN=SNRP70 - [RU17_HUMAN]         | 2.6217    |           | 1.0467    | 8.7295    | 6.339      | 6.077     | 7.607     | 7.019     | 7.419   | 7.019   |                 |
| E9P54     | Uncharacterized protein OS=Homo sapiens GN=SRP8 PE=4 Sv=1 - [E9P54_HUMAN]                               | 1.18356   |           | 8.7295    | 6.339     | 6.339      | 6.949     | 6.339     | 5.941     | 6.339   | 5.941   |                 |
| P5580-2   | Isomorf 2 of protein domain superfamily 1 OS=Homo sapiens GN=VDAC2 - [VDAC2_HUMAN]                      | 8.45567   | 4.01667   |           |           | 7.927      | 7.804     | 7.927     | 7.804     | 6.902   | 6.902   |                 |
| P12181    | V-type proton ATPase subunit B, brain isoform OS=Homo sapiens GN=ATP9B1 PE=1 Sv=3 - [VAT9B_HUM]         | 1.9297    | 9.3285    | 5.9136    | 3.9256    | 7.111      | 6.970     | 7.111     | 6.954     | 7.041   | 6.655   |                 |
| Q43488    | Atlatrin B1 aldehyde reductase member 2 OS=Homo sapiens GN=ARKR2 PE=1 Sv=3 - [ARKR2_HUMAN]              | 7.9427    | 7.7356    | 3.2336    | 7.9556    | 7.888      | 6.889     | 6.510     | 6.903     | 7.088   | 6.888   |                 |
| P19523    | Spermidine synthase OS=Homo sapiens GN=SRM PE=1 Sv=1 - [SPEM_HUMAN]                                     | 1.9357    | 1.2077    | 5.3585    | 6.167     | 7.082      | 6.729     | 7.082     | 6.905     | 0.381   |         |                 |
| Q11428    | Splicing factor 3A subunit 2 OS=Homo sapiens GN=SF3A2 PE=1 Sv=2 - [SF3A2_HUMAN]                         | 3.3267    | 1.5217    | 9.1216    | 6.9916    | 7.522      | 7.182     | 6.960     | 6.966     | 7.352   | 6.973   |                 |
| P5128     | TROV2 protein, member 1 OS=Homo sapiens GN=TROV2 PE=1 Sv=1 - [TROV2_HUMAN]                              | 1.7767    | 1.2307    | 6.9095    | 6.749     | 7.249      | 7.091     | 7.249     | 7.171     | 7.171   | 6.968   |                 |
| Q9Y558    | Translin-associated protein 1 OS=Homo sapiens GN=TSNAX PE=1 Sv=1 - [TSNAX_HUMAN]                        | 1.8947    | 4.5195    | 1.4347    | 7.277     | 7.277      | 6.655     | 7.156     | 7.277     | 6.906   | 6.372   |                 |
| Q15056-2  | Isomorf 2 of Eukaryotic translation initiation factor 4H OS=Homo sapiens GN=EIF4H - [IF4H_HUMAN]        | 6.7147    | 7.1887    | 3.1977    | 2.7357    | 7.827      | 7.505     | 7.437     | 7.842     | 7.471   | 7.371   |                 |
| P61405    | Histone H4 OS=Homo sapiens GN=HIST1H4 PE=1 Sv=2 - [H4_HUMAN]                                            | 3.8107    | 2.6047    | 1.3657    | 1.3227    | 7.581      | 7.416     | 7.135     | 7.121     | 7.498   | 7.128   |                 |
| BM1453    | Transcriptional coactivator CoA2 OS=Homo sapiens GN=RBM14RBM1 fusion PE=2 Sv=1 - [BM1453_HUMAN]         | 1.4447    | 5.0286    | 4.9806    | 2.7306    | 7.159      | 6.701     | 6.697     | 6.436     | 6.930   | 6.527   |                 |
| Q01721    | Uncharacterized protein OS=Homo sapiens GN=CCND1 PE=1 Sv=1 - [CCND1_HUMAN]                              | 1.2528    | 1.1945    | 1.3228    | 8.416     | 8.416      | 8.416     | 8.416     | 8.416     | 8.416   | 8.416   |                 |
| F8W25     | Uncharacterized protein OS=Homo sapiens GN=DNM1L PE=3 Sv=1 - [F8W25_HUMAN]                              | 1.1837    | 1.6407    | 8.1346    | 6.8705    | 7.339      | 7.215     | 6.910     | 6.938     | 7.277   | 6.924   |                 |
| Q01081    | Splicing factor U2AF 35 kDa subunit OS=Homo sapiens GN=U2AF1 PE=1 Sv=3 - [U2AF1_HUMAN]                  | 2.5007    | 1.6057    | 4.4836    | 6.9626    | 7.182      | 7.017     | 6.652     | 6.844     | 7.099   | 6.748   |                 |
| E9PC19    | Uncharacterized protein OS=Homo sapiens GN=PDPS PE=3 Sv=1 - [E9PC19_HUMAN]                              | 4.7517    | 4.5407    | 2.0277    | 7.687     | 7.687      | 7.316     | 6.767     | 7.316     | 6.351   | 6.351   |                 |
| Q9N4R5    | Sialic acid synthase                                                                                    |           |           |           |           |            |           |           |           |         |         |                 |

|          |                                                                                                                     |         |         |         |         |         |         |         |       |       |       |
|----------|---------------------------------------------------------------------------------------------------------------------|---------|---------|---------|---------|---------|---------|---------|-------|-------|-------|
| P00588   | Phosphoglycerate kinase 1 OS=Homo sapiens GN=PGK1 PE=1 SV=3 - [PGK1_HUMAN]                                          | 3.13388 | 2.32778 | 1.75388 | 8.496   | 8.367   | 8.244   | 8.095   | 8.431 | 8.169 | 0.262 |
| C93850   | Ribosomal protein L28, isoform CRA_c OS=Homo sapiens GN=RL28 PE=4 SV=1 - [C93850_HUMAN]                             | 7.76227 | 8.86667 | 3.41117 | 3.99227 | 7.890   | 7.768   | 7.533   | 7.601 | 7.829 | 0.262 |
| Q9Y3C5   | Peptidyl-cis-trans isomerase Ia OS=Homo sapiens GN=PRPL1 PE=1 SV=1 - [PRPL1_HUMAN]                                  | 3.08887 | 6.81366 | 8.50766 | 7.08887 | 7.400   | 6.534   | 6.930   | 6.871 | 7.165 | 0.261 |
| E7B9A1   | Uncharacterized protein OS=Homo sapiens GN=PPRSP2 PE=4 SV=1 - [E7B9A1_HUMAN]                                        | 1.67687 | 6.80966 | 6.58166 | 7.224   | 6.935   | 6.818   | 6.700   | 6.818 | 6.818 | 0.261 |
| P62851   | 40S ribosomal protein S25 OS=Homo sapiens GN=RS25 PE=1 SV=1 - [RS25_HUMAN]                                          | 7.65887 | 3.54477 | 2.77677 | 2.94177 | 7.884   | 7.550   | 7.468   | 7.469 | 7.717 | 0.261 |
| P00403   | Cytochrome c oxidase subunit 2 OS=Homo sapiens GN=MT-CO2 PE=1 SV=1 - [COX2_HUMAN]                                   | 4.69687 | 3.65077 | 2.31177 | 2.23877 | 6.732   | 7.562   | 7.364   | 7.350 | 7.617 | 0.260 |
| FW9759   | Uncharacterized protein OS=Homo sapiens GN=HANGAP1 PE=4 SV=1 - [FW9759_HUMAN]                                       | 2.11727 | 2.54957 | 7.80466 | 1.29977 | 7.677   | 7.189   | 6.892   | 7.114 | 7.263 | 0.260 |
| E7CWF1   | Uncharacterized protein OS=Homo sapiens GN=H1387 PE=4 SV=1 - [E7CWF1_HUMAN]                                         | 3.16687 | 3.16687 | 7.05877 | 3.16687 | 7.05877 | 7.05877 | 7.05877 | 7.174 | 8.037 | 0.260 |
| E75S08   | Uncharacterized protein OS=Homo sapiens GN=HM33 PE=4 SV=1 - [E75S08_HUMAN]                                          | 4.88387 | 2.92577 | 2.04877 | 1.90677 | 7.642   | 7.466   | 7.311   | 7.280 | 7.554 | 0.258 |
| P52758   | Ribonuclease UK114 OS=Homo sapiens GN=HRSP12 PE=1 SV=1 - [UK114_HUMAN]                                              | 1.86977 | 1.07377 | 6.23366 | 9.81766 | 7.272   | 7.031   | 6.195   | 6.992 | 7.151 | 0.258 |
| P13584   | General transcription factor IIIF subunit 2 OS=Homo sapiens GN=GTTF2F2 PE=1 SV=2 - [TF2F_HUMAN]                     | 6.10226 | 1.01336 | 1.46236 | 1.29136 | 6.185   | 6.006   | 6.165   | 6.111 | 6.396 | 0.258 |
| P04908   | Histone H2A type 1-B/E OS=Homo sapiens GN=H2AHAB PE=1 SV=2 - [H2AHB_HUMAN]                                          | 1.07088 | 2.92887 | 5.09977 | 5.91077 | 8.030   | 7.964   | 7.707   | 7.772 | 7.997 | 0.257 |
| P402W1   | Uncharacterized protein OS=Homo sapiens GN=C21-1 PE=1 SV=1 - [C21-1_HUMAN]                                          | 1.57877 | 2.57877 | 4.93687 | 3.83887 | 6.596   | 6.596   | 6.596   | 6.596 | 6.596 | 0.257 |
| Q07055   | Cytoskeleton-associated protein 4 OS=Homo sapiens GN=CAP4 PE=1 SV=2 - [CAP4_HUMAN]                                  | 2.04587 | 1.27887 | 8.95866 | 8.97566 | 7.311   | 7.107   | 6.952   | 6.953 | 7.209 | 0.256 |
| BR2277   | Uncharacterized protein OS=Homo sapiens GN=HNI PE=4 SV=1 - [BR2277_HUMAN]                                           | 3.75177 | 2.92077 | 1.92577 | 1.75077 | 7.574   | 7.465   | 7.285   | 7.243 | 7.520 | 0.256 |
| Q9Y262   | Eukaryotic translation initiation factor 3 subunit L OS=Homo sapiens GN=EIF3L PE=1 SV=1 - [EIF3L_HUMAN]             | 1.56777 | 1.09577 | 5.11336 | 1.04077 | 7.195   | 7.039   | 6.709   | 7.017 | 7.117 | 0.254 |
| P56537   | Eukaryotic translation initiation factor 6 OS=Homo sapiens GN=EIF6 PE=1 SV=1 - [EIF6_HUMAN]                         | 3.12127 | 1.66687 | 1.73577 | 1.74667 | 7.494   | 7.279   | 7.242   | 7.494 | 7.241 | 0.254 |
| E7C8B9   | Uncharacterized protein OS=Homo sapiens GN=H1387 PE=4 SV=1 - [E7C8B9_HUMAN]                                         | 7.88287 | 2.92577 | 2.04877 | 1.90677 | 7.642   | 7.466   | 7.311   | 7.280 | 7.554 | 0.254 |
| B72608   | Uncharacterized protein OS=Homo sapiens GN=FHL1 PE=2 SV=1 - [B72608_HUMAN]                                          | 3.22687 | 1.63977 | 1.24777 | 1.34777 | 7.509   | 7.215   | 7.096   | 7.129 | 7.362 | 0.249 |
| P49736   | DNA replication licensing factor MCM2 OS=Homo sapiens GN=MCM2 PE=1 SV=4 - [MCM2_HUMAN]                              | 1.87177 | 1.84887 | 6.96466 | 1.57977 | 7.272   | 7.267   | 6.843   | 7.198 | 7.269 | 0.249 |
| Q9Y220-2 | Isom 2 of Suppressor of G2 allele of SKP1 homolog OS=Homo sapiens GN=SUGT1 - [SUGT1_HUMAN]                          | 2.77887 | 1.36987 | 5.99366 | 1.27177 | 7.444   | 7.136   | 6.982   | 7.104 | 7.290 | 0.247 |
| E7F948   | Uncharacterized protein OS=Homo sapiens GN=HMC4 PE=3 SV=1 - [E7F948_HUMAN]                                          | 3.18177 | 2.80977 | 1.42277 | 2.01577 | 7.503   | 7.439   | 7.153   | 7.304 | 7.476 | 0.247 |
| P62140   | Serine/threonine-protein phosphatase P1 OS=Homo sapiens GN=PPP1CB PE=1 SV=3 - [PPP1CB_HUMAN]                        | 1.57877 | 2.92887 | 5.09977 | 5.91077 | 8.030   | 7.964   | 7.707   | 7.772 | 7.997 | 0.247 |
| E9PAQ6   | Uncharacterized protein OS=Homo sapiens GN=CCT3 PE=3 SV=1 - [E9PAQ6_HUMAN]                                          | 1.30488 | 1.10088 | 5.18387 | 8.98687 | 8.115   | 8.041   | 7.715   | 7.954 | 8.078 | 0.244 |
| Q9YHV9   | Prefoldin subunit 2 OS=Homo sapiens GN=PF2D2 PE=1 SV=1 - [PF2D2_HUMAN]                                              | 3.07177 | 2.39277 | 2.92177 | 2.91177 | 7.844   | 7.487   | 7.379   | 7.464 | 7.665 | 0.244 |
| Q81B3-2  | Isom 2 of Serine/arginine methyltransferase protein 1 OS=Homo sapiens GN=SRRM1 - [SRRM1_HUMAN]                      | 3.10387 | 1.27177 | 1.95466 | 1.30377 | 7.492   | 7.104   | 6.994   | 7.115 | 7.298 | 0.244 |
| P68402   | Platelet-activating factor acetylhydrolase IB subunit beta OS=Homo sapiens GN=PAFAH1B2 PE=1 SV=1 - [PAFAH1B2_HUMAN] | 2.36127 | 2.30177 | 1.24867 | 1.43477 | 7.373   | 7.362   | 7.096   | 7.156 | 7.368 | 0.241 |
| Q9Y2C3   | Uncharacterized protein OS=Homo sapiens GN=H1387 PE=4 SV=1 - [Q9Y2C3_HUMAN]                                         | 7.88287 | 2.92577 | 2.04877 | 1.90677 | 7.642   | 7.466   | 7.311   | 7.280 | 7.554 | 0.241 |
| P5974-2  | Uncharacterized protein OS=Homo sapiens GN=H1387 PE=4 SV=1 - [P5974-2_HUMAN]                                        | 2.68977 | 2.35677 | 1.48777 | 1.40777 | 7.430   | 7.372   | 7.172   | 7.148 | 7.401 | 0.240 |
| P61204   | Cyclin-dependent kinase regulatory subunit 1 OS=Homo sapiens GN=CKS1B PE=1 SV=1 - [CKS1B_HUMAN]                     | 1.13587 | 6.98566 | 6.98566 | 7.055   | 6.748   | 6.789   | 6.585   | 6.817 | 7.055 | 0.238 |
| Q9Y6A4   | Leucine-rich repeat-containing protein 59 OS=Homo sapiens GN=LRRCS9 PE=1 SV=1 - [LRRCS9_HUMAN]                      | 3.58087 | 2.75387 | 1.82977 | 1.80177 | 7.514   | 7.440   | 7.262   | 7.255 | 7.497 | 0.238 |
| P04941   | Superoxide dismutase (Cu,Zn) OS=Homo sapiens GN=SOD1 PE=1 SV=2 - [SODC_HUMAN]                                       | 4.14687 | 2.97277 | 2.01177 | 2.04977 | 7.758   | 7.473   | 7.303   | 7.311 | 7.545 | 0.238 |
| Q13438   | Splectin-like protein 2 OS=Homo sapiens GN=SLPL2 PE=1 SV=1 - [SLPL2_HUMAN]                                          | 6.40877 | 2.92887 | 5.09977 | 5.91077 | 8.030   | 7.964   | 7.707   | 7.772 | 7.997 | 0.238 |
| Q9Y348   | Flap endonuclease 1 OS=Homo sapiens GN=FEN1 PE=1 SV=1 - [FEN1_HUMAN]                                                | 2.32987 | 1.56887 | 1.08477 | 1.13767 | 7.367   | 7.195   | 7.035   | 7.056 | 7.281 | 0.236 |
| E9PL16   | Uncharacterized protein OS=Homo sapiens GN=RL27A PE=3 SV=1 - [E9PL16_HUMAN]                                         | 1.94887 | 3.75177 | 3.40177 | 5.23477 | 7.961   | 7.758   | 7.522   | 7.719 | 7.860 | 0.236 |
| Q9UNZ6-4 | Isom 4 of NSF1-like cofactor p47 OS=Homo sapiens GN=NSF1LC - [NSF1LC_HUMAN]                                         | 1.85587 | 1.65587 | 1.10767 | 9.41566 | 7.288   | 7.219   | 7.044   | 6.974 | 7.244 | 0.235 |
| Q9Y295   | Developmentally-regulated GTP-binding protein 1 OS=Homo sapiens GN=DRG1 PE=1 SV=1 - [DRG1_HUMAN]                    | 1.06477 | 6.98986 | 3.90866 | 9.03966 | 7.027   | 6.987   | 6.592   | 6.966 | 7.007 | 0.233 |
| P02610   | Protein SCG1 homolog, mitochondrial OS=Homo sapiens GN=SCG1 PE=1 SV=1 - [SCG1_HUMAN]                                | 1.57877 | 1.00587 | 7.59666 | 6.93886 | 7.157   | 7.002   | 6.880   | 6.834 | 7.101 | 0.233 |
| FH1E11   | Uncharacterized protein OS=Homo sapiens GN=COPE PE=4 SV=1 - [FH1E11_HUMAN]                                          | 2.32127 | 2.02477 | 1.44067 | 1.11267 | 7.366   | 7.306   | 7.158   | 7.050 | 7.336 | 0.232 |
| P13190   | Cytochrome b-c1 complex subunit 1, mitochondrial OS=Homo sapiens GN=UQCRC1 PE=1 SV=3 - [UQCRC1_HUMAN]               | 3.12427 | 2.92377 | 1.96177 | 7.495   | 7.466   | 7.205   | 7.293   | 7.480 | 7.104 | 0.232 |
| P48444   | Cofactor subunit delta OS=Homo sapiens GN=ARCN1 PE=1 SV=1 - [COFD_HUMAN]                                            | 1.48687 | 6.49366 | 1.18227 | 6.477   | 7.172   | 6.808   | 7.073   | 7.172 | 6.941 | 0.231 |
| Q9Y490   | Talin-1 OS=Homo sapiens GN=TLN1 PE=1 SV=2 - [TLN1_HUMAN]                                                            | 4.29277 | 3.46887 | 2.89887 | 1.78377 | 7.633   | 7.540   | 7.461   | 7.251 | 7.586 | 0.230 |
| Q12323-2 | Isom 2 of Gamma-glutamylcysteine synthetase OS=Homo sapiens GN=GGCT - [GGCT_HUMAN]                                  | 1.12987 | 5.97266 | 4.94666 | 5.97266 | 7.157   | 6.765   | 6.858   | 6.878 | 7.053 | 0.230 |
| P36511   | Coproporphyrinogen-III oxidase, mitochondrial OS=Homo sapiens GN=CPOX PE=1 SV=3 - [HEM6_HUMAN]                      | 1.20447 | 1.40177 | 1.01887 | 1.06767 | 7.347   | 7.146   | 6.808   | 6.894 | 7.081 | 0.229 |
| Q9YU35   | Serine/arginine methyltransferase protein 2 OS=Homo sapiens GN=SRRM2 PE=1 SV=2 - [SRRM2_HUMAN]                      | 2.22487 | 1.40177 | 1.01887 | 1.06767 | 7.347   | 7.146   | 6.808   | 6.894 | 7.081 | 0.229 |
| P30050   | 60S ribosomal protein L12 OS=Homo sapiens GN=RL12 PE=1 SV=1 - [RL12_HUMAN]                                          | 1.26118 | 8.48387 | 5.02677 | 7.43977 | 8.101   | 7.929   | 7.701   | 7.871 | 8.015 | 0.228 |
| FH5L24   | Uncharacterized protein OS=Homo sapiens GN=HCT13 PE=5 SV=1 - [FH5L24_HUMAN]                                         | 2.16117 | 1.50887 | 1.06767 | 1.06767 | 7.336   | 7.178   | 7.028   | 7.256 | 7.708 | 0.228 |
| P15105   | Myosin Vb right chain 12A OS=Homo sapiens GN=MYL12A PE=1 SV=1 - [MYL12A_HUMAN]                                      | 6.40877 | 2.92887 | 5.09977 | 5.91077 | 8.030   | 7.964   | 7.707   | 7.772 | 7.997 | 0.228 |
| P12956   | X-ray repair cross-complementing protein 6 OS=Homo sapiens GN=XRCC6 PE=1 SV=2 - [XRCC6_HUMAN]                       | 1.29688 | 6.73887 | 5.04177 | 5.67887 | 8.112   | 8.029   | 7.733   | 7.754 | 7.970 | 0.227 |
| Q9M529   | Phenylalanyl-tRNA synthetase beta chain OS=Homo sapiens GN=FA8B PE=1 SV=3 - [SYFB_HUMAN]                            | 1.08727 | 3.31566 | 3.62266 | 7.036   | 6.533   | 6.533   | 6.533   | 6.533 | 6.533 | 0.226 |
| C93853   | Uncharacterized protein OS=Homo sapiens GN=RB7A PE=3 SV=1 - [C93853_HUMAN]                                          | 2.49587 | 2.00777 | 1.02167 | 1.76677 | 7.397   | 7.303   | 7.009   | 7.247 | 7.350 | 0.226 |
| P33993   | DNA replication licensing factor MCV7 OS=Homo sapiens GN=MCM7 PE=1 SV=4 - [MCM7_HUMAN]                              | 2.00977 | 1.85767 | 9.24866 | 1.45377 | 7.303   | 7.269   | 6.966   | 7.162 | 7.286 | 0.226 |
| Q9YU10-2 | Isom 2 of Calcium gluconate-dependent protein kinase OS=Homo sapiens GN=CKII - [CKII_HUMAN]                         | 1.97887 | 1.18888 | 6.28887 | 9.87887 | 7.858   | 7.858   | 7.858   | 7.858 | 7.858 | 0.226 |
| P27816-6 | Isom 6 of Microtubule-associated protein 4 OS=Homo sapiens GN=MAP4 - [MAP4_HUMAN]                                   | 3.97887 | 3.70677 | 2.33577 | 2.28367 | 7.600   | 7.569   | 7.368   | 7.359 | 7.584 | 0.226 |
| 014828-2 | Isom 2 of Secretary carrier-associated membrane protein 3 OS=Homo sapiens GN=SCAMP3 - [SCAMP3_HUMAN]                | 1.02488 | 6.52666 | 7.02677 | 7.02677 | 8.246   | 6.931   | 6.687   | 6.847 | 6.847 | 0.221 |
| P61163   | Alpha-centractin OS=Homo sapiens GN=ACTR1A PE=1 SV=1 - [ACT1_HUMAN]                                                 | 3.08987 | 2.15087 | 1.50667 | 1.59687 | 7.490   | 7.378   | 7.178   | 7.203 | 7.411 | 0.221 |
| Q9Y531   | Barrier-to-autointegration factor 3 OS=Homo sapiens GN=BAI3 PE=1 SV=1 - [BAI3_HUMAN]                                | 1.24588 | 6.20587 | 6.43666 | 9.80587 | 8.095   | 7.852   | 7.807   | 7.704 | 7.976 | 0.221 |
| FW9735   | Uncharacterized protein OS=Homo sapiens GN=HAP11 PE=3 SV=1 - [HAP11_HUMAN]                                          | 1.57877 | 1.57877 | 9.82177 | 6.42666 | 7.828   | 7.828   | 7.828   | 7.828 | 7.828 | 0.221 |
| P61204   | ADP-ribosylation factor 3 OS=Homo sapiens GN=ARF3 PE=1 SV=2 - [ARF3_HUMAN]                                          | 4.90787 | 5.59477 | 2.23577 | 4.45767 | 7.691   | 7.478   | 7.349   | 7.649 | 7.719 | 0.220 |
| P61203   | 60S ribosomal protein L38 OS=Homo sapiens GN=RL38 PE=1 SV=2 - [RL38_HUMAN]                                          | 1.36788 | 7.43587 | 5.80987 | 6.35387 | 8.136   | 8.081   | 7.764   | 8.004 | 7.804 | 0.220 |
| Q9B8C2   | Uridine-cytidine kinase 2 OS=Homo sapiens GN=UCK2 PE=1 SV=1 - [UCK2_HUMAN]                                          | 5.36066 | 3.23166 | 6.729   | 6.729   | 6.729   | 6.509   | 6.509   | 6.509 | 6.509 | 0.220 |
| P12004   | Proteasome activator complex subunit 1 OS=Homo sapiens GN=PA28C PE=1 SV=1 - [PACA_HUMAN]                            | 1.50088 | 1.24388 | 7.72787 | 8.75887 | 8.178   | 8.095   | 7.848   | 7.943 | 7.915 | 0.220 |
| Q9Y2E4   | Soybean protein S (Fragment) OS=Homo sapiens GN=SN3S PE=2 SV=1 - [Q9Y2E4_HUMAN]                                     | 1.61277 | 1.11277 | 1.19577 | 5.64866 | 7.207   | 7.046   | 6.862   | 6.752 | 7.046 | 0.220 |
| B4DD02   | Uncharacterized protein OS=Homo sapiens GN=DHRF PE=2 SV=1 - [B4DD02_HUMAN]                                          | 3.83787 | 1.36787 | 1.37887 | 1.38587 | 7.584   | 7.136   | 7.139   | 7.142 | 7.360 | 0.219 |
| P55072   | Transitional endoplasmic reticulum ATPase OS=Homo sapiens GN=VCP PE=1 SV=4 - [TERA_HUMAN]                           | 1.24788 | 6.56887 | 5.18887 | 5.79077 | 8.096   | 7.817   | 7.715   | 7.763 | 7.957 | 0.219 |
| Q9B8D7   | Carboxy-terminal nucleic acid-phosphatase OS=Homo sapiens GN=NTPCR PE=1 SV=1 - [NTPCR_HUMAN]                        | 2.17987 | 1.57887 | 1.19787 | 1.05477 | 7.338   | 7.198   | 7.078   | 7.023 | 7.268 | 0.219 |
| Q11105   | Burkitt's lymphoma cell line OS=Homo sapiens GN=BM1 PE=1 SV=1 - [SET_HUMAN]                                         | 1.35488 | 3.65888 | 1.94688 | 1.65888 | 8.426   | 8.226   | 8.079   | 8.226 | 8.079 | 0.218 |
| P13693   | Transcriptionally-controlled tumor protein OS=Homo sapiens GN=TP73 PE=1 SV=1 - [TP73_HUMAN]                         | 9.50487 | 4.73387 | 4.00387 | 4.63887 | 8.524   | 8.226   | 8.226   | 8.226 | 8.226 | 0.217 |
| Q81U44   | Leucine-rich repeat-containing protein 47 OS=Homo sapiens GN=LRRCA7 PE=1 SV=1 - [LRRCA7_HUMAN]                      | 1.45987 | 1.91766 | 6.00066 | 8.23666 | 7.164   | 6.963   | 6.778   | 6.916 | 7.064 | 0.217 |
| E7E7K1   | Uncharacterized protein OS=Homo sapiens GN=SEPT7 PE=3 SV=1 - [E7E7K1_HUMAN]                                         | 3.27687 | 2.25477 | 1.75787 | 1.55387 | 7.515   | 7.353   | 7.245   | 7.191 | 7.434 | 0.217 |
| P08579   | U2 small nuclear ribonucleoprotein B OS=Homo sapiens GN=SNRBP2 PE=1 SV=1 - [RUB2_HUMAN]                             | 1.77387 | 1.24587 | 7.50666 | 1.08887 | 7.249   | 7.095   | 6.927   | 7.172 | 6.956 | 0.216 |
| Q33A25   | RNA-binding protein 1 OS=Homo sapiens GN=RNBP1 PE=4 SV=1 - [RNBP1_HUMAN]                                            | 1.77387 | 1.24587 | 7.50666 | 1.08887 | 7.249   | 7.095   | 6.927   | 7.172 | 6.956 | 0.216 |
| F5YQ02   | Uncharacterized protein OS=Homo sapiens GN=TRM112 PE=4 SV=1 - [F5YQ02_HUMAN]                                        | 2.48287 | 2.29887 | 9.86566 | 1.21477 | 7.395   | 7.114   | 7.094   | 7.084 | 7.254 | 0.216 |
| P55036   | 26S proteasome non-ATPase regulatory subunit 4 OS=Homo sapiens GN=PSMD4 PE=1 SV=1 - [PSMD4_HUMAN]                   | 4.00117 | 1.20887 | 1.19387 | 1.51087 | 7.602   | 7.082   | 7.077   | 7.179 | 7.342 | 0.216 |
| P61214   | Small nuclear ribonucleoprotein Sm D1 OS=Homo sapiens GN=SNRPD1 PE=1 SV=1 - [SMDD1_HUMAN]                           | 9.24187 | 1.07687 | 6.62787 | 3.73287 | 7.966   | 7.856   | 7.821   | 7.572 | 7.911 | 0.214 |
| Q14240   | Eukaryotic initiation factor 4A OS=Homo sapiens GN=EIF4A2 PE=1 SV=2 - [IF4A2_HUMAN]                                 | 2.42888 | 1.05988 | 9.86567 | 9.72687 | 8.385   | 8.025   | 7.994   | 7.988 | 8.205 | 0.214 |
| Q33A07   | Uncharacterized protein OS=Homo sapiens GN=H1387 PE=4 SV=1 - [Q33A07_HUMAN]                                         | 7.88288 | 2.92578 | 2.04878 | 1.90678 | 7.642   | 7.466   | 7.311   | 7.280 | 7.554 | 0.214 |
| Q14157-4 | Isom 4 of Ubiquitin-associated protein 2-like OS=H                                                                  |         |         |         |         |         |         |         |       |       |       |

|          |                                                                                                                    |         |         |         |         |       |         |       |       |       |
|----------|--------------------------------------------------------------------------------------------------------------------|---------|---------|---------|---------|-------|---------|-------|-------|-------|
| Q9Y371   | Endophilin-B1 OS=Homo sapiens GN=SH3GLB1 PE=1 SV=1 - [SH3L1_HUMAN]                                                 | 1.07027 |         |         | 6.95065 | 7.029 | 6.842   | 7.029 | 6.842 | 0.187 |
| Q00425   | Insulin-like growth factor 2 mRNA-binding protein 3 OS=Homo sapiens GN=IGFBP3 PE=2 SV=2 - [IF2B3_HUMAN]            | 5.94367 | 3.97567 | 3.23887 | 3.01067 | 7.767 | 7.599   | 7.513 | 7.479 | 0.187 |
| EP92K4   | Insulin-like growth factor 2 mRNA-binding protein 3 OS=Homo sapiens GN=IGFBP3 PE=2 SV=2 - [IF2B3_HUMAN]            | 5.94367 | 3.97567 | 3.23887 | 3.01067 | 7.767 | 7.599   | 7.513 | 7.479 | 0.187 |
| B3KPW0   | G-rich RNA sequence binding factor 1, isoform CRA_A OS=Homo sapiens GN=GRSF1 PE=2 SV=1 - [B3KPW0_HUMAN]            | 3.62367 | 3.19167 | 2.15567 | 2.26567 | 7.559 | 7.504   | 7.333 | 7.355 | 0.187 |
| P39566   | Dolichyl-diphosphoglycerate-3-phosphate glycoyltransferase 48 kDa subunit OS=Homo sapiens GN=DDO51                 | 3.29967 | 3.60067 | 2.16867 | 2.32367 | 7.518 | 7.556   | 7.366 | 7.377 | 0.187 |
| O95373   | Importin-7 OS=Homo sapiens GN=IPOT7 PE=1 SV=1 - [IPOT_HUMAN]                                                       | 1.97667 | 1.43067 | 1.14367 | 1.04967 | 7.296 | 7.155   | 7.058 | 7.021 | 0.186 |
| 959831-3 | Isomorphin 3 of Agouti-signaling factor 1, mitochondrial OS=Homo sapiens GN=ADP1A1 - [ADP1A1_HUMAN]                | 6.67367 | 5.06767 | 3.76167 | 3.81767 | 7.824 | 7.705   | 7.575 | 7.582 | 0.186 |
| P28666   | Insulin-like growth factor 2 mRNA-binding protein 3 OS=Homo sapiens GN=IGFBP3 PE=2 SV=2 - [IF2B3_HUMAN]            | 5.94367 | 3.97567 | 3.23887 | 3.01067 | 7.767 | 7.599   | 7.513 | 7.479 | 0.186 |
| P14174   | Macrophage migration inhibitory factor OS=Homo sapiens GN=MIF PE=1 SV=4 - [MIF_HUMAN]                              | 8.26267 | 6.28867 | 4.82367 | 4.94467 | 8.917 | 8.798   | 8.652 | 8.694 | 0.185 |
| F22229   | Phosphoglycerate mutase OS=Homo sapiens PE=3 SV=1 - [F2229_HUMAN]                                                  | 3.31767 | 1.81467 | 1.62867 | 1.57967 | 8.521 | 8.259   | 8.198 | 8.390 | 0.185 |
| P35527   | Keratin, type 1 cytoskeletal 9 OS=Homo sapiens GN=KRT9 PE=1 SV=3 - [K1C9_HUMAN]                                    | 2.70367 | 2.13367 | 1.58567 | 1.59467 | 8.442 | 8.329   | 8.200 | 8.386 | 0.184 |
| P08238   | Heat shock protein 90 beta OS=Homo sapiens GN=HSP90B1 PE=1 SV=4 - [HSP90B_HUMAN]                                   | 7.61167 | 4.88267 | 3.87667 | 4.11367 | 8.883 | 8.689   | 8.588 | 8.614 | 0.184 |
| P04264   | Keratin, type 1 cytoskeletal 1 OS=Homo sapiens GN=KRT1 PE=1 SV=6 - [K1C1_HUMAN]                                    | 7.41967 | 5.21267 | 3.79567 | 4.37667 | 8.870 | 8.717   | 8.579 | 8.641 | 0.184 |
| O95YR6   | Ribophorin II OS=Homo sapiens GN=SRN2 PE=2 SV=1 - [Q95YR6_HUMAN]                                                   | 2.95867 | 2.33367 | 1.58667 | 1.86867 | 7.471 | 7.368   | 7.200 | 7.419 | 0.184 |
| Q91984   | Sideroflexin-1 OS=Homo sapiens GN=SFN1 PE=1 SV=4 - [SFN1_HUMAN]                                                    | 3.93367 | 1.68167 | 1.30267 | 2.18967 | 7.595 | 7.225   | 7.100 | 7.271 | 0.184 |
| B40R31   | Uncharacterized protein OS=Homo sapiens GN=DPYSL2 PE=2 SV=1 - [B40R31_HUMAN]                                       | 2.01667 | 1.46867 | 0.95766 | 1.33167 | 7.305 | 7.167   | 6.982 | 7.124 | 0.183 |
| Q9UMU4   | Programmed cell death 6-interacting protein OS=Homo sapiens GN=PCID6IP PE=1 SV=1 - [PC6IP_HUMAN]                   | 2.43267 | 1.73667 | 1.34567 | 1.35167 | 7.384 | 7.240   | 7.129 | 7.131 | 0.182 |
| P05623   | Inhibitor of caspase OS=Homo sapiens GN=INHCA PE=1 SV=1 - [INHCA_HUMAN]                                            | 1.39167 | 0.92867 | 0.70367 | 0.88167 | 8.143 | 7.968   | 7.892 | 7.856 | 0.182 |
| Q00041   | Vaglin OS=Homo sapiens GN=HDLBP PE=1 SV=2 - [VGLN_HUMAN]                                                           | 2.20367 | 1.91667 | 1.24267 | 1.49067 | 7.343 | 7.281   | 7.088 | 7.173 | 0.182 |
| Q15102   | Platelet-activating factor acetylhydrolase IB subunit gamma OS=Homo sapiens GN=PAFAH1B3 PE=1 SV=1 - [EP7EPD_HUMAN] | 1.97767 | 1.27667 | 1.13167 | 0.90156 | 7.296 | 7.106   | 7.084 | 6.955 | 0.182 |
| EP7EPD   | Uncharacterized protein OS=Homo sapiens GN=ACAD9 PE=4 SV=1 - [EP7EPD_HUMAN]                                        | 7.45366 | 3.76156 | 4.70956 | 5.07156 | 6.872 | 6.867   | 6.673 | 6.670 | 0.181 |
| O95777   | N-alpha-acetyltransferase 28, Nac auxiliary subunit OS=Homo sapiens GN=NAASB PE=1 SV=3 - [NAASB_HUMAN]             | 1.62467 | 1.44767 | 1.07367 | 1.52266 | 7.211 | 7.160   | 7.031 | 6.979 | 0.181 |
| Q96424   | Protein LVRTC OS=Homo sapiens GN=LVRTC PE=1 SV=2 - [LVRTC_HUMAN]                                                   | 1.80167 | 1.09567 | 0.72956 | 0.72566 | 7.040 | 6.957   | 7.148 | 6.967 | 0.180 |
| P59897   | Uncharacterized protein OS=Homo sapiens GN=TRAP1 PE=3 SV=1 - [F59897_HUMAN]                                        | 3.51567 | 2.43767 | 1.89767 | 1.97267 | 8.546 | 8.387   | 8.278 | 8.295 | 0.180 |
| P38117   | Electron transfer flavoprotein subunit beta OS=Homo sapiens GN=ETF3 PE=2 SV=3 - [ETF3_HUMAN]                       | 4.52967 | 2.99967 | 2.43367 | 2.43967 | 7.656 | 7.477   | 7.386 | 7.567 | 0.180 |
| B73236   | ATPase, Na+/K+ transporting, alpha 1 polypeptide, isoform CRA_A OS=Homo sapiens GN=ATP1A1 PE=2 SV=2                | 3.90767 | 2.89067 | 1.84867 | 2.63767 | 7.592 | 7.455   | 7.267 | 7.421 | 0.179 |
| P51021   | Uncharacterized protein OS=Homo sapiens GN=CHP4 PE=4 SV=1 - [F51021_HUMAN]                                         | 6.48366 | 4.90266 | 3.50626 | 3.68166 | 6.812 | 6.956   | 6.704 | 6.642 | 0.179 |
| P27921   | Ribonuclease H1 OS=Homo sapiens GN=RNH1 PE=1 SV=1 - [RNH1_HUMAN]                                                   | 1.94567 | 1.59567 | 1.49567 | 1.49567 | 7.982 | 7.862   | 7.642 | 7.642 | 0.179 |
| Q80811   | THO complex subunit 4 OS=Homo sapiens GN=THOC4 PE=1 SV=3 - [THOC4_HUMAN]                                           | 8.18467 | 7.46867 | 7.89567 | 7.41267 | 7.913 | 7.873   | 7.895 | 7.533 | 0.179 |
| P08195-2 | Isomorphin 2 of Agouti-signaling factor heavy chain OS=Homo sapiens GN=SLC3A2 - [AF2_HUMAN]                        | 4.71467 | 2.76667 | 2.77067 | 2.77067 | 7.673 | 7.442   | 7.315 | 7.442 | 0.179 |
| B72911   | Uncharacterized protein OS=Homo sapiens GN=ACADM PE=2 SV=1 - [B72911_HUMAN]                                        | 3.35967 | 1.83767 | 1.17167 | 1.58067 | 7.526 | 7.264   | 7.199 | 7.395 | 0.178 |
| P21333-2 | Isomorphin 2 of Flavin-A OS=Homo sapiens GN=HNA - [HNA_HUMAN]                                                      | 3.39367 | 2.52867 | 1.81367 | 2.08067 | 7.529 | 7.402   | 7.258 | 7.188 | 0.178 |
| Q14658   | Fibrinogen alpha 1 OS=Homo sapiens GN=FIB1A PE=1 SV=3 - [FIB1A_HUMAN]                                              | 4.93767 | 4.78267 | 3.68167 | 4.25867 | 7.926 | 7.813   | 7.652 | 7.518 | 0.178 |
| P31040   | Succinate dehydrogenase [ubiquinone] flavoprotein subunit, mitochondrial OS=Homo sapiens GN=SDHA PE=               | 4.02967 | 3.62567 | 2.98867 | 2.16467 | 7.605 | 7.559   | 7.475 | 7.335 | 0.177 |
| P06753   | Isomorphin 2 of Topomoyasin alpha-3 chain OS=Homo sapiens GN=TPM3 - [TPM3_HUMAN]                                   | 2.68767 | 1.97067 | 1.12667 | 1.03867 | 8.429 | 8.276   | 8.051 | 8.203 | 0.176 |
| Q15836   | Vesicle-associated membrane protein 3 OS=Homo sapiens GN=VAMP3 PE=1 SV=3 - [VAMP3_HUMAN]                           | 9.11766 | 3.70366 | 3.73366 | 4.01766 | 6.960 | 6.569   | 6.572 | 6.604 | 0.176 |
| FRW40    | Uncharacterized protein OS=Homo sapiens GN=ULIH4 PE=1 SV=1 - [FRW40_HUMAN]                                         | 3.03867 | 2.13267 | 1.56667 | 1.84067 | 7.482 | 7.329   | 7.195 | 7.265 | 0.176 |
| Q31032   | Uncharacterized protein OS=Homo sapiens GN=ULIH4 PE=1 SV=1 - [FRW40_HUMAN]                                         | 3.03867 | 2.13267 | 1.56667 | 1.84067 | 7.482 | 7.329   | 7.195 | 7.265 | 0.176 |
| P14152   | Isocoulyl-RNA synthetase, cytoplasmic OS=Homo sapiens GN=IARS PE=1 SV=2 - [SYIC_HUMAN]                             | 6.19867 | 3.73267 | 3.29467 | 3.13767 | 6.572 | 6.572   | 6.572 | 6.572 | 0.175 |
| P06493   | Cyclin-dependent kinase 1 OS=Homo sapiens GN=CDK1 PE=1 SV=3 - [CDK1_HUMAN]                                         | 3.99967 | 2.72767 | 2.20167 | 2.21167 | 7.602 | 7.436   | 7.343 | 7.345 | 0.175 |
| P15374   | Ubiquitin carboxyl-terminal hydrolase isozyme L3 OS=Homo sapiens GN=UCHL3 PE=1 SV=1 - [UCHL3_HUMAN]                | 2.08267 | 1.31267 | 0.97466 | 1.27467 | 7.318 | 7.118   | 6.981 | 7.105 | 0.174 |
| P25374   | Uncharacterized protein OS=Homo sapiens GN=ULH3 PE=1 SV=1 - [UCHL3_HUMAN]                                          | 3.66267 | 2.54767 | 1.93567 | 2.15067 | 7.564 | 7.406   | 7.287 | 7.333 | 0.174 |
| P24534   | Elongation factor 1-beta OS=Homo sapiens GN=EF1B2 PE=1 SV=3 - [EF1B_HUMAN]                                         | 0.90867 | 0.63167 | 0.48367 | 0.51567 | 7.958 | 7.804   | 7.687 | 7.725 | 0.175 |
| Q60814   | Uncharacterized protein OS=Homo sapiens GN=EF1B2 PE=1 SV=3 - [EF1B_HUMAN]                                          | 0.90867 | 0.63167 | 0.48367 | 0.51567 | 7.958 | 7.804   | 7.687 | 7.725 | 0.175 |
| P62191   | 26S proteasome regulatory subunit 4 OS=Homo sapiens GN=PSMC1 PE=1 SV=1 - [PR54_HUMAN]                              | 2.79067 | 2.02367 | 1.67467 | 1.56367 | 7.446 | 7.321   | 7.224 | 7.194 | 0.174 |
| Q9G273   | SRA stem-loop-interacting RNA-binding protein, mitochondrial OS=Homo sapiens GN=SLIRP PE=1 SV=1 - [SI              | 3.03267 | 2.69567 | 1.79367 | 1.98867 | 7.481 | 7.401   | 7.254 | 7.383 | 0.174 |
| P00568   | Adenylate kinase isoenzyme 1 OS=Homo sapiens GN=AK1 PE=1 SV=3 - [KAD1_HUMAN]                                       | 1.30967 | 1.20567 | 0.92866 | 0.76366 | 7.117 | 7.081   | 6.968 | 6.883 | 0.174 |
| Q15417   | Calpain-3 OS=Homo sapiens GN=CAPN3 PE=1 SV=1 - [CAPN3_HUMAN]                                                       | 2.74467 | 1.03567 | 0.84066 | 1.15167 | 7.438 | 7.015   | 6.926 | 7.180 | 0.173 |
| P09429   | Hsp90 molecular chaperone protein beta OS=Homo sapiens GN=HSP90B1 PE=1 SV=1 - [H90B_HUMAN]                         | 2.80867 | 2.05367 | 1.48267 | 1.53167 | 8.262 | 8.138   | 8.023 | 8.180 | 0.173 |
| P13101   | X-ray repair cross-complementing protein 5 OS=Homo sapiens GN=XRCC5 PE=1 SV=3 - [XRCC5_HUMAN]                      | 1.09067 | 0.71267 | 0.58067 | 0.60467 | 8.037 | 7.853   | 7.766 | 7.778 | 0.173 |
| F5H6N3   | Uncharacterized protein OS=Homo sapiens GN=CLTA PE=4 SV=1 - [F5H6N3_HUMAN]                                         | 2.87167 | 2.18367 | 1.46267 | 1.74567 | 7.458 | 7.339   | 7.287 | 7.399 | 0.172 |
| P23246   | Splicing factor, proline- and glutamine-rich OS=Homo sapiens GN=SFQ1 PE=2 SV=2 - [SFQO_HUMAN]                      | 1.66167 | 1.18167 | 0.84467 | 1.00367 | 8.220 | 8.072   | 7.947 | 8.001 | 0.172 |
| P05395   | Rab GDP dissociation inhibitor beta OS=Homo sapiens GN=GDID PE=1 SV=2 - [GDIB_HUMAN]                               | 5.86967 | 4.58467 | 3.39467 | 3.58567 | 7.769 | 7.661   | 7.554 | 7.715 | 0.172 |
| P52442   | ATP dependent protein 4A1 OS=Homo sapiens GN=ANP32 PE=1 SV=1 - [ATP4_HUMAN]                                        | 1.31867 | 1.08167 | 0.78967 | 0.82967 | 7.412 | 7.306   | 7.189 | 7.356 | 0.172 |
| P54727   | UV excision repair protein RAD23 homolog B OS=Homo sapiens GN=RAD23B PE=1 SV=1 - [RD23B_HUMAN]                     | 2.61867 | 1.80867 | 1.32267 | 1.62267 | 7.418 | 7.257   | 7.121 | 7.210 | 0.172 |
| P06733   | Alpha-enolase OS=Homo sapiens GN=ENO1 PE=1 SV=2 - [ENO1_HUMAN]                                                     | 1.41967 | 1.05467 | 0.84667 | 0.80126 | 9.152 | 9.023   | 8.928 | 8.904 | 0.172 |
| F5M721   | Uncharacterized protein OS=Homo sapiens GN=WP11 PE=4 SV=1 - [F5M721_HUMAN]                                         | 1.90267 | 1.37267 | 1.19667 | 1.62667 | 6.279 | 6.137   | 6.078 | 6.279 | 0.172 |
| FRW40A   | Ras-related protein Rab-18 OS=Homo sapiens GN=RAB18 PE=1 SV=1 - [RAB18_HUMAN]                                      | 3.17467 | 2.15667 | 1.72767 | 1.75367 | 7.532 | 7.334   | 7.248 | 7.248 | 0.172 |
| PS0K92   | Uncharacterized protein OS=Homo sapiens GN=HSP100 PE=1 SV=1 - [HSP100_HUMAN]                                       | 5.74767 | 4.56467 | 3.39267 | 3.53767 | 8.759 | 8.37667 | 8.548 | 8.705 | 0.172 |
| Q01082   | Spectrin beta chain, brain 1 OS=Homo sapiens GN=SPRTN1 PE=1 SV=2 - [SPTRB_HUMAN]                                   | 1.10467 | 0.66567 | 0.46766 | 0.39576 | 7.043 | 6.564   | 6.668 | 6.597 | 0.171 |
| P05176   | ATP synthase subunit beta, mitochondrial OS=Homo sapiens GN=ATP5B PE=1 SV=3 - [ATP5B_HUMAN]                        | 4.04167 | 2.92667 | 2.26267 | 2.37967 | 8.606 | 8.466   | 8.355 | 8.366 | 0.171 |
| B4E241   | Splicing factor, arginine/serine-rich 3, isoform CRA_A OS=Homo sapiens GN=SRFS3 PE=2 SV=1 - [B4E241_HUMAN]         | 9.66067 | 6.29267 | 5.13967 | 5.99767 | 7.995 | 7.799   | 7.841 | 7.602 | 0.171 |
| P11142   | Heat shock cognate 71 kDa protein OS=Homo sapiens GN=HSPA70 PE=1 SV=1 - [HSPA70_HUMAN]                             | 1.01767 | 0.92967 | 0.67067 | 0.68067 | 9.007 | 8.857   | 8.713 | 8.811 | 0.171 |
| EP9495   | Uncharacterized protein OS=Homo sapiens GN=ANP22 PE=1 SV=1 - [EP9495_HUMAN]                                        | 2.80867 | 2.05367 | 1.48267 | 1.53167 | 8.262 | 8.138   | 8.023 | 8.180 | 0.171 |
| EP9C52   | Uncharacterized protein OS=Homo sapiens GN=RBPP7 PE=4 SV=1 - [EP9C52_HUMAN]                                        | 6.69467 | 5.50967 | 4.04767 | 4.16667 | 7.826 | 7.741   | 7.607 | 7.619 | 0.170 |
| P25705   | ATP synthase subunit alpha, mitochondrial OS=Homo sapiens GN=ATP5A1 PE=1 SV=1 - [ATP5A_HUMAN]                      | 2.65867 | 1.42667 | 1.07867 | 1.15067 | 8.425 | 8.154   | 8.070 | 8.289 | 0.170 |
| B40D06   | Uncharacterized protein OS=Homo sapiens GN=OBNI PE=2 SV=1 - [B40D06_HUMAN]                                         | 1.88067 | 1.03267 | 1.25067 | 1.25067 | 7.225 | 7.014   | 7.097 | 7.225 | 0.170 |
| P15008   | 26S proteasome non-ATPase regulatory subunit 5 OS=Homo sapiens GN=PSMD5 PE=1 SV=1 - [PSMD5_HUMAN]                  | 1.93367 | 1.39867 | 1.12667 | 1.27567 | 7.497 | 7.342   | 7.200 | 7.420 | 0.170 |
| P39019   | Eukaryotic initiation factor 4A1 OS=Homo sapiens GN=EIF4A3 PE=1 SV=4 - [IF4A3_HUMAN]                               | 1.93367 | 1.58867 | 1.08767 | 1.63567 | 8.144 | 7.880   | 7.846 | 8.033 | 0.170 |
| P50402   | Emerin OS=Homo sapiens GN=EMD PE=1 SV=1 - [EMD_HUMAN]                                                              | 2.10567 | 2.04967 | 1.34967 | 1.43267 | 7.313 | 7.312   | 7.130 | 7.156 | 0.169 |
| Q85636   | Glutaredoxin-related protein 5, mitochondrial OS=Homo sapiens GN=GLRX5 PE=1 SV=2 - [GLRX5_HUMAN]                   | 1.25767 | 0.70866 | 0.60566 | 0.62856 | 7.085 | 6.851   | 6.928 | 6.968 | 0.169 |
| P39019   | 40S ribosomal protein S19 OS=Homo sapiens GN=RPS19 PE=2 SV=1 - [RPS19_HUMAN]                                       | 1.91867 | 1.14467 | 0.80967 | 0.99967 | 8.283 | 8.059   | 8.016 | 7.987 | 0.169 |
| Q9Y402   | Uncharacterized protein OS=Homo sapiens GN=HSP90B1 PE=1 SV=1 - [H90B_HUMAN]                                        | 7.61167 | 4.88267 | 3.87667 | 4.11367 | 8.883 | 8.689   | 8.588 | 8.614 | 0.169 |
| O14922-9 | Isomorphin 9 of Histone acetyltransferase type 2 catalytic subunit OS=Homo sapiens GN=HAT1 - [HAT1_HUMAN]          | 2.07867 | 1.25967 | 0.94766 | 1.27267 | 7.318 | 7.100   | 6.967 | 7.210 | 0.168 |
| P00491   | Purine nucleoside phosphorylase OS=Homo sapiens GN=PNP PE=1 SV=2 - [PNP_HUMAN]                                     | 3.25267 | 1.82567 | 1.78067 | 1.53867 | 7.512 | 7.261   | 7.250 | 7.187 | 0.168 |
| Q12904   | Aminocyclase RNA synthase complex-interacting multifunctional protein 1 OS=Homo sapiens GN=AIMP1 PE=1              | 1.30967 | 1.57667 | 1.74067 | 1.28667 | 7.117 | 7.198   | 7.070 | 7.109 | 0.168 |
| M99193   | GMP synthase [glutamine-hydrolyzing] OS=Homo sapiens GN=GMPS PE=1 SV=1 - [GUA_HUMAN]                               | 4.59467 | 4.20767 | 2.89567 | 3.12167 | 7.662 | 7.624   | 7.456 | 7.494 | 0.168 |
| EP9235   | Importin-7 OS=Homo sapiens GN=IPOT7 PE=1 SV=1 - [IPOT_HUMAN]                                                       | 1.97667 | 1.43067 | 1.14367 | 1.04967 | 7.296 | 7.155   | 7.058 | 7.021 | 0.168 |
| AK8766   | Poly(RC) binding protein 2, isoform CRA_B OS=Homo sapiens GN=PCBP2 PE=2 SV=1 - [AK8766_HUMAN]                      | 0.15867 | 0.66667 | 0.58667 | 0.67937 | 7.982 | 7.985   | 7.768 | 7.843 | 0.168 |
| Q9Y230   | RuvB-like 2 OS=Homo sapiens GN=RUVBL2 PE=1 SV=3 - [RUVBL2_HUMAN]                                                   | 6.19767 | 4.38367 | 3.42667 | 3.66667 | 7.792 | 7.642   | 7.535 | 7.564 | 0.168 |
| Q00299   | Chloride intracellular channel protein 1 OS=Homo sapiens GN=CLIC1 PE=1 SV=4 - [CLIC1_HUMAN]                        | 3.64667 | 5.00067 | 3.87667 | 3.82467 | 7.802 | 7.702   | 7.588 | 7.757 | 0.168 |
| Q09017   | 14-3-3 protein eta OS=Homo sapiens GN=YWHAE PE=1 SV=4 - [1433F_HUMAN]                                              | 1.64267 | 1.03867 | 0.96467 | 0.84367 | 8.215 | 8.015   | 7.971 | 7.926 | 0.167 |
| Q9Y283   | Putative nuclear pore protein 2 OS=Homo sapiens GN=NP2 PE=1 SV=2 - [LCT2_HUMAN]                                    | 2.32367 | 1.      |         |         |       |         |       |       |       |

|          |                                                                                                                     |         |         |          |         |       |       |       |       |       |       |       |
|----------|---------------------------------------------------------------------------------------------------------------------|---------|---------|----------|---------|-------|-------|-------|-------|-------|-------|-------|
| P51610-2 | Isoform 2 of Host cell factor 1 OS=Homo sapiens GN=HCF1 (-HCF1_HUMAN)                                               | 1.32777 | 8.54866 | 7.93566  | 7.08466 | 7.123 | 6.932 | 6.900 | 6.850 | 7.027 | 6.875 | 0.152 |
| Q90888   | Peptidyl-prolyl cis-trans isomerase FKBP3 OS=Homo sapiens GN=FKBP3 PE=1 SV=1 (-FKBP3_HUMAN)                         | 7.27177 | 3.38877 | 3.99877  | 3.24877 | 7.862 | 7.555 | 7.602 | 7.510 | 7.708 | 7.556 | 0.152 |
| Q91266   | Nuclear ribonucleoproteins A1 OS=Homo sapiens GN=NUC1 PE=1 SV=1 (-NUC1_HUMAN)                                       | 6.85387 | 7.88277 | 3.53787  | 3.62387 | 7.823 | 7.508 | 7.537 | 7.559 | 7.702 | 7.555 | 0.152 |
| P25196   | Probable ATP-dependent RNA helicase DDX6 OS=Homo sapiens GN=DDX6 PE=1 SV=2 (-DDX6_HUMAN)                            | 1.21267 | 1.21267 | 8.36766  | 8.71966 | 7.083 | 7.083 | 6.923 | 6.940 | 7.083 | 6.932 | 0.152 |
| FS0794   | Uncharacterized protein OS=Homo sapiens GN=OTUB1 PE=4 SV=1 (-FS0794_HUMAN)                                          | 3.58667 | 2.35477 | 1.78667  | 2.34977 | 7.585 | 7.372 | 7.252 | 7.371 | 7.463 | 7.311 | 0.152 |
| Q9YSL4   | Mitochondrial import inner membrane translocase subunit Timl3 OS=Homo sapiens GN=TIMM13L PE=1 SV=1                  | 5.03577 | 5.09887 | 3.01277  | 4.24177 | 8.208 | 7.707 | 8.079 | 7.627 | 7.705 | 7.553 | 0.152 |
| P27353   | 40S ribosomal protein S6 OS=Homo sapiens GN=RPS6 PE=1 SV=1 (-RPS6_HUMAN)                                            | 1.85858 | 1.27488 | 1.05788  | 1.11588 | 7.262 | 7.105 | 7.424 | 8.047 | 8.187 | 8.036 | 0.151 |
| P27324   | Cytochrome c-haem cytochrome c OS=Homo sapiens GN=CYTH PE=1 SV=1 (-CYTH_HUMAN)                                      | 7.08587 | 7.80887 | 7.80887  | 7.80887 | 7.808 | 7.808 | 7.808 | 7.808 | 7.808 | 7.808 | 0.151 |
| B40X08   | Uncharacterized protein OS=Homo sapiens GN=HUBP1 PE=2 SV=1 (-B40X08_HUMAN)                                          | 7.46787 | 5.49677 | 4.39067  | 4.66667 | 7.873 | 7.740 | 7.642 | 7.669 | 7.807 | 7.656 | 0.151 |
| P51148   | Ras-related protein Rab-5C OS=Homo sapiens GN=RAB5C PE=1 SV=2 (-RAB5C_HUMAN)                                        | 1.43467 | 1.63067 | 1.13667  | 1.02667 | 7.156 | 7.212 | 7.055 | 7.011 | 7.184 | 7.033 | 0.151 |
| P13639   | Elongation factor 2 OS=Homo sapiens GN=EEF2 PE=1 SV=4 (-EEF2_HUMAN)                                                 | 2.73488 | 2.40088 | 1.79288  | 1.82788 | 8.437 | 8.380 | 8.253 | 8.262 | 8.408 | 8.258 | 0.151 |
| P11714   | Aspartate aminotransferase, cytoplasmic OS=Homo sapiens GN=PF1 PE=1 SV=3 (-PF1_HUMAN)                               | 2.54667 | 2.00177 | 1.49277  | 1.70667 | 7.406 | 7.301 | 7.174 | 7.232 | 7.354 | 7.203 | 0.150 |
| FS4688   | Uncharacterized protein OS=Homo sapiens GN=HSPAL1 PE=1 SV=1 (-FS4688_HUMAN)                                         | 7.08887 | 2.20287 | 2.02887  | 2.02887 | 7.508 | 7.343 | 7.318 | 7.223 | 7.426 | 7.293 | 0.150 |
| FS9408   | Uncharacterized protein OS=Homo sapiens GN=SF3A1 PE=4 SV=1 (-FS9408_HUMAN)                                          | 1.74787 | 1.63277 | 1.15467  | 1.23767 | 7.242 | 7.213 | 7.062 | 7.092 | 7.228 | 7.077 | 0.150 |
| Q15019   | Septin-2 OS=Homo sapiens GN=SEPT2 PE=1 SV=1 (-SEPT2_HUMAN)                                                          | 3.99667 | 2.95667 | 2.48467  | 2.38167 | 7.602 | 7.471 | 7.395 | 7.377 | 7.536 | 7.386 | 0.150 |
| P35998   | 26S protease regulatory subunit 7 OS=Homo sapiens GN=PSMC2 PE=1 SV=3 (-PSMC2_HUMAN)                                 | 2.81267 | 2.26167 | 1.99867  | 1.59467 | 7.449 | 7.354 | 7.301 | 7.203 | 7.402 | 7.252 | 0.150 |
| P50502   | Hc70-interacting protein OS=Homo sapiens GN=HIT31 PE=1 SV=2 (-HIT31_HUMAN)                                          | 4.87767 | 6.10967 | 5.20867  | 2.86867 | 7.688 | 7.786 | 7.717 | 7.458 | 7.737 | 7.587 | 0.150 |
| P60866   | 40S ribosomal protein S20 OS=Homo sapiens GN=RPS20 PE=1 SV=1 (-RPS20_HUMAN)                                         | 1.96867 | 7.98267 | 8.14467  | 8.14467 | 7.508 | 7.508 | 7.508 | 7.508 | 7.508 | 7.508 | 0.150 |
| P07237   | Protein disulfide-isomerase OS=Homo sapiens GN=PIH4 PE=1 SV=3 (-PIH4_HUMAN)                                         | 7.46187 | 3.29167 | 3.19767  | 3.87267 | 7.873 | 7.517 | 7.505 | 7.588 | 7.695 | 7.546 | 0.149 |
| P62937   | Peptidyl-prolyl cis-trans isomerase A OS=Homo sapiens GN=PP1A PE=1 SV=2 (-ATF31_HUMAN)                              | 7.17688 | 6.01688 | 4.30488  | 5.05688 | 8.856 | 8.779 | 8.634 | 8.704 | 8.818 | 8.686 | 0.149 |
| P24539   | ATP synthase subunit b, mitochondrial OS=Homo sapiens GN=ATP5F1 PE=1 SV=2 (-ATP5F1_HUMAN)                           | 3.31567 | 1.73467 | 1.47867  | 1.96567 | 7.521 | 7.239 | 7.169 | 7.293 | 7.380 | 7.231 | 0.149 |
| Q9NR49   | Nicotinamide phosphoribosyltransferase OS=Homo sapiens GN=NAAPT PE=1 SV=1 (-NAAPT_HUMAN)                            | 2.59887 | 1.31887 | 1.13887  | 1.52167 | 7.415 | 7.120 | 7.056 | 7.182 | 7.267 | 7.119 | 0.149 |
| P81017   | Heat shock protein 70 OS=Homo sapiens GN=HSPA70 PE=1 SV=1 (-HSP70_HUMAN)                                            | 7.08887 | 2.59287 | 4.95887  | 4.95887 | 7.891 | 7.722 | 7.682 | 7.686 | 7.807 | 7.616 | 0.149 |
| P73840-2 | Isoform 2 of Alpha-synuclein OS=Homo sapiens GN=SNCA (-SYUA_HUMAN)                                                  | 9.20066 | 5.58866 | 5.59066  | 6.35666 | 6.964 | 6.745 | 6.747 | 6.686 | 6.854 | 6.707 | 0.148 |
| P46781   | 40S ribosomal protein S9 OS=Homo sapiens GN=RPS9 PE=1 SV=3 (-RPS9_HUMAN)                                            | 3.39267 | 1.87767 | 1.63067  | 1.98467 | 7.530 | 7.273 | 7.212 | 7.298 | 7.402 | 7.255 | 0.148 |
| P43487   | Ran-specific GTPase-activating protein OS=Homo sapiens GN=RANBP1 PE=1 SV=1 (-RANG_HUMAN)                            | 1.44488 | 9.79167 | 7.96767  | 9.01767 | 8.159 | 8.991 | 7.901 | 7.955 | 8.075 | 7.928 | 0.147 |
| Q9NRK4   | 14 kDa phosphate-dependent phosphatase OS=Homo sapiens GN=PH11 PE=1 SV=1 (-PH11_HUMAN)                              | 5.81167 | 4.93467 | 3.74067  | 3.90067 | 7.764 | 7.693 | 7.573 | 7.591 | 7.729 | 7.582 | 0.147 |
| B40W16   | Isoform 1 of Histone-binding protein 1 OS=Homo sapiens GN=HBBP1 PE=1 SV=1 (-HBBP1_HUMAN)                            | 1.59867 | 1.59867 | 1.59867  | 1.59867 | 7.908 | 7.908 | 7.908 | 7.908 | 7.908 | 7.908 | 0.147 |
| P61106   | Ras-related protein Rab-14 OS=Homo sapiens GN=RAB14 PE=1 SV=4 (-RAB14_HUMAN)                                        | 4.69787 | 2.19267 | 3.09867  | 1.69967 | 7.672 | 7.341 | 7.491 | 7.230 | 7.506 | 7.361 | 0.146 |
| FW8181   | 60S ribosomal protein L6 OS=Homo sapiens GN=RPL6 PE=1 SV=1 (-RPL6_HUMAN)                                            | 1.49188 | 7.75367 | 7.23367  | 8.17867 | 8.173 | 8.889 | 7.913 | 8.031 | 8.361 | 8.148 | 0.146 |
| Q3Z288   | Uncharacterized protein OS=Homo sapiens GN=MTHFD1 PE=1 SV=1 (-G3Z288_HUMAN)                                         | 5.85667 | 5.85867 | 5.85867  | 5.85867 | 7.932 | 7.880 | 7.767 | 7.754 | 7.906 | 7.761 | 0.145 |
| B40R70   | Uncharacterized protein OS=Homo sapiens GN=PLUS PE=1 SV=1 (-B40R70_HUMAN)                                           | 8.29567 | 2.98867 | 2.94867  | 2.73567 | 7.724 | 7.471 | 7.467 | 7.437 | 7.597 | 7.452 | 0.145 |
| Q14257   | Reticulocalnexin-1 OS=Homo sapiens GN=RCN1 PE=1 SV=1 (-RCN1_HUMAN)                                                  | 1.97867 | 1.97867 | 1.97867  | 1.97867 | 7.891 | 7.891 | 7.891 | 7.891 | 7.891 | 7.891 | 0.145 |
| B72181   | Tubulin beta-4B chain OS=Homo sapiens GN=TUBB4B PE=1 SV=1 (-TBB4B_HUMAN)                                            | 1.37989 | 1.10499 | 8.81688  | 8.86488 | 9.139 | 9.043 | 8.945 | 8.948 | 9.091 | 8.946 | 0.145 |
| 887355   | Uncharacterized protein OS=Homo sapiens GN=ATP7A1 PE=2 SV=1 (-ATP7A1_HUMAN)                                         | 2.51367 | 1.71867 | 1.45667  | 1.52367 | 7.400 | 7.235 | 7.174 | 7.183 | 7.318 | 7.173 | 0.145 |
| Q13011   | Delta(3,5)-Delta(2,4)-dehydro-ATPase, mitochondrial OS=Homo sapiens GN=ECH1 PE=1 SV=2 (-ECH1_HUMAN)                 | 1.93887 | 1.94267 | 1.36767  | 1.41967 | 7.287 | 7.288 | 7.136 | 7.152 | 7.288 | 7.144 | 0.144 |
| Q9PH03   | Integrin-linked kinase-associated serine/threonine phosphatase 2C OS=Homo sapiens GN=ILKAP PE=1 SV=1 (-ILKAP_HUMAN) | 1.16167 | 7.81568 | 8.58467  | 6.84468 | 7.065 | 6.893 | 6.835 | 6.979 | 6.835 | 6.979 | 0.144 |
| Q9YSL4   | Uncharacterized protein OS=Homo sapiens GN=HSP101 PE=1 SV=1 (-HSP101_HUMAN)                                         | 7.08887 | 7.08887 | 7.08887  | 7.08887 | 7.088 | 7.088 | 7.088 | 7.088 | 7.088 | 7.088 | 0.144 |
| Q04637-5 | Isoform 5 of Eukaryotic translation initiation factor 4 gamma 1 OS=Homo sapiens GN=EIF4G1 (-IF4G1_HUMAN)            | 4.18187 | 2.82767 | 2.66867  | 2.29067 | 7.621 | 7.451 | 7.426 | 7.360 | 7.536 | 7.393 | 0.143 |
| Q72784   | DNAJC7 protein OS=Homo sapiens GN=DNAJC7 PE=2 SV=1 (-Q72784_HUMAN)                                                  | 1.02767 | 7.12966 | 6.31866  | 5.99366 | 7.012 | 6.853 | 6.801 | 6.778 | 6.923 | 6.789 | 0.143 |
| Q15181   | Inorganic pyrophosphatase OS=Homo sapiens GN=PP1A PE=1 SV=2 (-PP1A_HUMAN)                                           | 1.29988 | 1.36888 | 1.11788  | 1.14188 | 8.255 | 8.136 | 8.048 | 8.057 | 8.196 | 8.052 | 0.143 |
| Q9NR13-2 | Isoform 2 of Structural maintenance of chromosomes protein 4 OS=Homo sapiens GN=SMC4 (-SMC4_HUMAN)                  | 2.30967 | 1.93567 | 1.50667  | 1.48267 | 7.363 | 7.287 | 7.193 | 7.171 | 7.325 | 7.162 | 0.143 |
| Q9YSL4   | Uncharacterized protein OS=Homo sapiens GN=HSP90A PE=1 SV=1 (-HSP90A_HUMAN)                                         | 7.08887 | 7.08887 | 7.08887  | 7.08887 | 7.088 | 7.088 | 7.088 | 7.088 | 7.088 | 7.088 | 0.143 |
| EP9LK3   | Uncharacterized protein OS=Homo sapiens GN=NEPFS1 PE=1 SV=1 (-EP9LK3_HUMAN)                                         | 2.79187 | 1.82267 | 1.46767  | 1.79767 | 7.446 | 7.261 | 7.166 | 7.255 | 7.353 | 7.210 | 0.143 |
| A6MKB8   | Uncharacterized protein OS=Homo sapiens GN=RNPE4 PE=1 SV=1 (-A6MKB8_HUMAN)                                          | 2.51767 | 1.95767 | 1.62067  | 1.57867 | 7.401 | 7.292 | 7.198 | 7.346 | 7.204 | 7.042 | 0.143 |
| P33136-2 | Isoform 2 of Deoxyuridine 5'-triphosphate nucleodiphosphatase, mitochondrial OS=Homo sapiens GN=DUT (-DUT_HUMAN)    | 5.02967 | 2.58567 | 2.46667  | 2.74367 | 7.701 | 7.412 | 7.392 | 7.438 | 7.557 | 7.415 | 0.142 |
| Q9YSL4   | Isoform 1 of Cytoplasmic peroxisomal of Peroxisome-5, mitochondrial OS=Homo sapiens GN=PROX5 (-PROX5_HUMAN)         | 5.17667 | 4.80867 | 4.01067  | 4.16567 | 7.714 | 7.682 | 7.500 | 7.613 | 7.698 | 7.556 | 0.142 |
| Q9YSL4   | NADH dehydrogenase (ubiquinone) 1 alpha subunit assembly factor OS=Homo sapiens GN=NDUFA1 (-NDUFA1_HUMAN)           | 6.81867 | 8.47466 | 8.47466  | 8.47466 | 8.474 | 8.474 | 8.474 | 8.474 | 8.474 | 8.474 | 0.142 |
| Q75369-6 | Isoform 6 of Flavin-B OS=Homo sapiens GN=FNBB (-FNBB_HUMAN)                                                         | 6.19367 | 1.57167 | 1.20767  | 1.09767 | 7.209 | 7.196 | 7.082 | 7.040 | 7.203 | 7.061 | 0.142 |
| E7EQJ1   | Uncharacterized protein OS=Homo sapiens GN=MSH2 PE=4 SV=1 (-E7EQJ1_HUMAN)                                           | 8.88366 | 5.09266 | 4.64866  | 5.06866 | 6.949 | 6.707 | 6.682 | 6.705 | 6.828 | 6.688 | 0.142 |
| Q9YSL4   | Vesicle-associated membrane protein-associated protein 8/C OS=Homo sapiens GN=VAMP8 PE=1 SV=3 (-VAMP8_HUMAN)        | 1.95467 | 6.61866 | 8.00666  | 7.65066 | 7.291 | 6.821 | 6.945 | 6.884 | 7.056 | 6.914 | 0.142 |
| P22214   | Ubiquitin-like modifier-activating enzyme 1 OS=Homo sapiens GN=UBM1 PE=1 SV=3 (-UBM1_HUMAN)                         | 1.81688 | 1.33188 | 1.80668  | 1.25688 | 8.259 | 8.124 | 8.001 | 8.099 | 8.192 | 8.050 | 0.142 |
| P53580   | Uncharacterized protein OS=Homo sapiens GN=HSP101 PE=1 SV=1 (-HSP101_HUMAN)                                         | 7.08887 | 7.08887 | 7.08887  | 7.08887 | 7.088 | 7.088 | 7.088 | 7.088 | 7.088 | 7.088 | 0.142 |
| P51659   | Peroxisomal multifunctional enzyme type 2 OS=Homo sapiens GN=HSD17B4 PE=1 SV=3 (-HSD17B4_HUMAN)                     | 2.11267 | 2.19967 | 1.46067  | 1.66467 | 7.325 | 7.342 | 7.164 | 7.221 | 7.334 | 7.193 | 0.141 |
| P52272-2 | Isoform 2 of Heterogeneous nuclear ribonucleoprotein M OS=Homo sapiens GN=HNRPM (-HNRPM_HUMAN)                      | 1.42188 | 8.95167 | 8.02967  | 9.12167 | 8.152 | 7.993 | 7.905 | 7.960 | 8.073 | 7.932 | 0.141 |
| Q00232   | 26S protease non-ATPase regulatory subunit 12 OS=Homo sapiens GN=PSMD12 PE=1 SV=3 (-PSMD12_HUMAN)                   | 1.86567 | 1.28467 | 1.41867  | 8.271   | 7.214 | 7.089 | 7.152 | 7.271 | 7.130 | 7.100 | 0.140 |
| P60338   | Lactate dehydrogenase A chain OS=Homo sapiens GN=LDAH PE=1 SV=2 (-LDAH_HUMAN)                                       | 2.06688 | 1.46688 | 1.20788  | 1.31288 | 8.374 | 8.166 | 8.062 | 8.118 | 8.240 | 8.130 | 0.140 |
| Q14737   | Programmed cell death protein 1 OS=Homo sapiens GN=CD95 PE=1 SV=1 (-CD95_HUMAN)                                     | 1.90268 | 5.31967 | 4.11867  | 4.11867 | 7.728 | 7.311 | 7.288 | 7.311 | 7.423 | 7.311 | 0.140 |
| Q9YSL4   | Isoform 3 of Inorganic pyrophosphatase 2, mitochondrial OS=Homo sapiens GN=PPA2 (-PPA2_HUMAN)                       | 3.74887 | 3.41867 | 2.21467  | 3.03067 | 7.573 | 7.534 | 7.345 | 7.482 | 7.554 | 7.413 | 0.140 |
| Q10212-3 | 40S ribosomal protein S3a OS=Homo sapiens GN=RPS3A PE=1 SV=2 (-RPS3A_HUMAN)                                         | 1.05068 | 7.85467 | 6.87267  | 6.29067 | 8.021 | 7.895 | 7.837 | 7.799 | 7.958 | 7.818 | 0.140 |
| P58546   | Myotrophin OS=Homo sapiens GN=MTPN PE=1 SV=2 (-MTPN_HUMAN)                                                          | 6.54467 | 4.85767 | 3.93067  | 4.27067 | 7.816 | 7.686 | 7.592 | 7.630 | 7.711 | 7.611 | 0.140 |
| P51923   | Methylenetetrahydrofolate synthetase, cytoplasmic OS=Homo sapiens GN=SHMT2 PE=1 SV=2 (-SHMT2_HUMAN)                 | 3.36467 | 6.52567 | 6.29667  | 6.54667 | 7.505 | 7.527 | 7.367 | 7.391 | 7.528 | 7.391 | 0.140 |
| P60228   | Eukaryotic translation initiation factor 3 subunit E OS=Homo sapiens GN=EIF3E PE=1 SV=1 (-EIF3E_HUMAN)              | 2.20467 | 1.60667 | 1.110267 | 1.69167 | 7.652 | 7.042 | 7.042 | 7.042 | 7.538 | 7.169 | 0.140 |
| B40407   | ATP synthase subunit O, mitochondrial OS=Homo sapiens GN=ATP5O PE=1 SV=1 (-ATP5O_HUMAN)                             | 4.10967 | 2.71267 | 2.68367  | 2.18967 | 7.614 | 7.433 | 7.429 | 7.340 | 7.524 | 7.384 | 0.139 |
| Q9YSL4   | PKAR2A protein OS=Homo sapiens GN=PKAR2A PE=2 SV=1 (-Q9YSL4_HUMAN)                                                  | 1.57367 | 1.37667 | 1.06867  | 1.07067 | 7.197 | 7.139 | 7.029 | 7.029 | 7.168 | 7.029 | 0.139 |
| Q7QZC4   | Staphylococcal nuclease domain-containing protein 1 OS=Homo sapiens GN=SNDC1 PE=1 SV=1 (-SNDC1_HUMAN)               | 5.95167 | 3.89867 | 3.39767  | 3.57367 | 7.775 | 7.586 | 7.531 | 7.553 | 7.681 | 7.542 | 0.138 |
| FW8706   | Uncharacterized protein OS=Homo sapiens GN=HSP90A PE=1 SV=1 (-HSP90A_HUMAN)                                         | 7.08887 | 7.08887 | 7.08887  | 7.08887 | 7.088 | 7.088 | 7.088 | 7.088 | 7.088 | 7.088 | 0.138 |
| EP9LH8   | Uncharacterized protein OS=Homo sapiens GN=ESTR2 PE=1 SV=1 (-EP9LH8_HUMAN)                                          | 1.96267 | 7.74567 | 1.05767  | 1.27567 | 7.257 | 7.027 | 7.004 | 6.929 | 7.132 | 6.932 | 0.138 |
| P62714   | Serine/threonine phosphatase 2A catalytic subunit beta isoform OS=Homo sapiens GN=PPP2C PE=1 SV=1                   | 2.18987 | 7.66466 | 1.02467  | 8.69066 | 7.340 | 6.884 | 7.010 | 6.939 | 7.112 | 6.975 | 0.138 |
| FS40F5   | Uncharacterized protein OS=Homo sapiens GN=ZC3H15 PE=1 SV=1 (-FS40F5_HUMAN)                                         | 1.09067 | 5.01366 | 7.90166  | 6.96666 | 7.037 | 6.978 | 6.898 | 6.843 | 7.008 | 6.870 | 0.138 |
| PA9721   | Proteasome subunit type 2 OS=Homo sapiens GN=PSMB2 PE=1 SV=1 (-PSMB2_HUMAN)                                         | 1.61067 | 1.42667 | 1.11067  | 1.10067 | 7.207 | 7.154 | 7.045 | 7.041 | 7.180 | 7.043 | 0.137 |
| Q9YSL4   | Glyoxal oxidase/hydroxypropyl-CoA lyase OS=Homo sapiens GN=HPOX PE=1 SV=1 (-HPOX_HUMAN)                             | 6.17667 | 6.17667 | 6.17667  | 6.17667 | 6.176 | 6.176 | 6.176 | 6.176 | 6.176 | 6.176 | 0.137 |
| P42771   | Cylin-dependent kinase inhibitor 2A, isoforms 1/2/3 OS=Homo sapiens GN=CDKN2A PE=1 SV=1 (-CDKN2A_HUMAN)             | 2.4726  |         |          |         |       |       |       |       |       |       |       |

|          |                                                                                                           |         |         |         |         |       |       |       |       |       |       |       |
|----------|-----------------------------------------------------------------------------------------------------------|---------|---------|---------|---------|-------|-------|-------|-------|-------|-------|-------|
| Q8K55-2  | Isomorf 2 of Histone-arginine methyltransferase CARM1 OS=Homo sapiens GN=CARM1 PE=1 SV=1 - [CARM1_HUMAN]  | 1.09957 | 1.63867 | 8.72268 | 1.18367 | 7.039 | 7.214 | 6.941 | 7.073 | 7.127 | 7.007 | 0.120 |
| P22ZD0   | Uncharacterized protein OS=Homo sapiens GN=USM02 PE=4 SV=1 - [P22ZD0_HUMAN]                               | 1.89828 | 1.35588 | 9.48027 | 1.56088 | 8.279 | 8.132 | 7.977 | 8.193 | 8.205 | 8.085 | 0.120 |
| P22ZD1   | Uncharacterized protein OS=Homo sapiens GN=USM02 PE=5 SV=1 - [P22ZD1_HUMAN]                               | 9.02867 | 8.83167 | 5.34567 | 5.66667 | 7.956 | 7.766 | 7.576 | 7.786 | 7.596 | 7.406 | 0.120 |
| C9W390   | Uncharacterized protein OS=Homo sapiens GN=PT1PFB PE=1 SV=1 - [C9W390_HUMAN]                              | 2.02067 | 1.49167 | 1.19867 | 1.45267 | 7.305 | 7.174 | 7.078 | 7.162 | 7.239 | 7.120 | 0.119 |
| B5M359   | Replication protein A3, 14kDa, isoform CRA_A OS=Homo sapiens GN=RP3 PE=4 SV=1 - [B5M359_HUMAN]            | 6.92456 | 5.59667 | 9.39966 | 1.51567 | 6.984 | 7.408 | 7.160 | 7.196 | 7.077 | 7.019 | 0.119 |
| P41250   | Glycyl-RNA synthetase OS=Homo sapiens GN=GARS PE=1 SV=3 - [SYG_HUMAN]                                     | 4.51167 | 4.82567 | 3.57067 | 3.53167 | 7.654 | 7.683 | 7.553 | 7.548 | 7.669 | 7.550 | 0.119 |
| P25205   | DNA replication licensing factor PCNA3 OS=Homo sapiens GN=PCNA3 PE=1 SV=3 - [MCH3_HUMAN]                  | 3.93867 | 3.01667 | 2.58167 | 2.66867 | 7.595 | 7.479 | 7.412 | 7.428 | 7.377 | 7.419 | 0.118 |
| Q8P2Q9   | Peptide 8 OS=Homo sapiens GN=PR8 PE=1 SV=1 - [PR8_HUMAN]                                                  | 1.57667 | 1.52667 | 0.50866 | 1.54367 | 7.157 | 7.167 | 6.957 | 7.197 | 7.188 | 7.073 | 0.117 |
| E7U949   | Uncharacterized protein OS=Homo sapiens GN=CALDI PE=4 SV=1 - [E7U949_HUMAN]                               | 1.84267 | 1.31467 |         | 1.18767 | 7.285 | 7.119 |       | 7.075 | 7.192 | 7.075 | 0.117 |
| Q14974   | Importin subunit beta-1 OS=Homo sapiens GN=KPMB1 PE=1 SV=1 - [IMB1_HUMAN]                                 | 7.73567 | 6.49467 | 5.33767 | 5.48667 | 7.888 | 7.812 | 7.727 | 7.739 | 7.850 | 7.733 | 0.117 |
| Q9Y3F4   | Serine-threonine kinase receptor-associated subunit OS=Homo sapiens GN=STRAP PE=1 SV=1 - [STRAP_HU]       | 3.27867 | 2.72767 | 2.16067 | 2.14667 | 7.616 | 7.436 | 7.334 | 7.408 | 7.476 | 7.359 | 0.117 |
| Q92522   | Histone H2A OS=Homo sapiens GN=H2AFY PE=1 SV=1 - [H2A_HUMAN]                                              | 4.09567 | 2.93067 | 2.73167 | 2.56667 | 7.712 | 7.467 | 7.436 | 7.409 | 7.540 | 7.423 | 0.117 |
| Q12405   | 395-residional protein OS=Homo sapiens GN=ANP2A PE=1 SV=1 - [ANP2A_HUMAN]                                 | 1.43367 | 1.11667 | 9.00667 | 1.07667 | 7.157 | 7.067 | 6.916 | 7.032 | 7.112 | 6.995 | 0.117 |
| Q60203   | Amidophosphoribosyltransferase OS=Homo sapiens GN=PPAT PE=1 SV=1 - [PURL_HUMAN]                           | 1.87367 | 1.34467 | 1.23367 | 1.19267 | 7.273 | 7.128 | 7.071 | 7.076 | 7.200 | 7.084 | 0.117 |
| P16949   | Stathin OS=Homo sapiens GN=STMN1 PE=1 SV=3 - [STMN1_HUMAN]                                                | 1.21068 | 0.93667 | 8.19567 | 8.24367 | 7.803 | 7.979 | 7.914 | 7.916 | 8.031 | 7.915 | 0.116 |
| P32119   | Peroxiredoxin-2 OS=Homo sapiens GN=PRDX2 PE=1 SV=5 - [PRDX2_HUMAN]                                        | 2.65118 | 1.88768 | 1.67668 | 1.74868 | 8.423 | 8.276 | 8.224 | 8.242 | 8.350 | 8.233 | 0.116 |
| Q13347   | Eukaryotic translation initiation factor 3 subunit 1 OS=Homo sapiens GN=EIF3 PE=1 SV=1 - [EIF31_HUMAN]    | 3.65267 | 2.56667 | 2.15567 | 2.55167 | 7.863 | 7.409 | 7.324 | 7.407 | 7.486 | 7.370 | 0.116 |
| P1281-2  | Isomorf 2 of Ubiquitin-conjugating enzyme E2 K OS=Homo sapiens GN=UBE2K - [UBE2K_HUMAN]                   | 1.91766 | 1.83566 | 6.97766 | 6.08466 | 6.964 | 6.894 | 6.844 | 6.784 | 6.929 | 6.814 | 0.115 |
| P49720   | Prosome subunit beta type-3 OS=Homo sapiens GN=PSMB3 PE=1 SV=2 - [PSB3_HUMAN]                             | 0.91767 | 1.90767 | 1.42267 | 2.30667 | 7.465 | 7.280 | 7.153 | 7.363 | 7.377 | 7.218 | 0.115 |
| P26583   | High mobility group protein B2 OS=Homo sapiens GN=HMGB2 PE=1 SV=2 - [HMGB2_HUMAN]                         | 8.84267 | 5.84867 | 6.20367 | 4.92167 | 7.947 | 7.767 | 7.793 | 7.692 | 7.857 | 7.742 | 0.114 |
| Q8QW06   | Myeloma-overexpressed gene 2 protein OS=Homo sapiens GN=MYO2 PE=2 SV=3 - [MYO2_HUMAN]                     | 1.68867 | 1.24467 | 1.06367 | 1.16567 | 7.227 | 7.095 | 7.027 | 7.068 | 7.161 | 7.047 | 0.114 |
| P26281   | 40S ribosomal protein L16 OS=Homo sapiens GN=L16 PE=1 SV=1 - [RSL16_HUMAN]                                | 3.89967 | 1.96867 | 1.09667 | 1.12967 | 8.254 | 8.529 | 8.093 | 8.154 | 8.238 | 8.124 | 0.114 |
| Q9L416   | Prosome activator complex subunit 2 OS=Homo sapiens GN=PSME2 PE=1 SV=4 - [PSME2_HUMAN]                    | 1.30967 | 0.81366 | 7.48566 | 8.40966 | 7.117 | 6.910 | 6.874 | 6.925 | 7.014 | 6.899 | 0.114 |
| P17812   | CTP synthase 1 OS=Homo sapiens GN=CTSP PE=1 SV=2 - [PYR3_HUMAN]                                           | 2.49467 | 1.41867 | 1.55867 | 1.58767 | 7.469 | 7.152 | 7.107 | 7.201 | 7.310 | 7.197 | 0.114 |
| Q9UM00   | Ubiquitin-1 OS=Homo sapiens GN=UBQLN1 PE=1 SV=2 - [UBQLN_HUMAN]                                           | 2.12367 | 1.73667 | 1.54467 | 1.41467 | 7.327 | 7.239 | 7.189 | 7.150 | 7.283 | 7.170 | 0.114 |
| Q9P9P9   | Vacuolar protein sorting-associated protein VTA1 homolog OS=Homo sapiens GN=VTA1 PE=1 SV=1 - [VTA1_HUMAN] | 2.48027 | 2.44567 | 1.81867 | 1.98067 | 7.395 | 7.388 | 7.259 | 7.297 | 7.391 | 7.278 | 0.113 |
| Q12620   | Alpha-9 protein OS=Homo sapiens GN=ALPHA9 PE=1 SV=1 - [ALPHA9_HUMAN]                                      | 1.18967 |         |         | 1.08967 | 7.086 |       |       |       |       | 6.924 | 0.113 |
| P3080-2  | Isomorf 2 of Profilin-2 OS=Homo sapiens GN=PFN2 - [PROF2_HUMAN]                                           | 2.14467 | 1.47367 | 1.30467 | 1.44267 | 7.331 | 7.168 | 7.115 | 7.159 | 7.250 | 7.137 | 0.113 |
| Q98RA2   | Isomorf 1 of Thib domain-containing protein 17 OS=Homo sapiens GN=TXND17 PE=1 SV=1 - [TXD17_HUMAN]        | 2.12367 | 1.05867 | 1.10567 | 1.21367 | 7.327 | 7.025 | 7.044 | 7.084 | 7.176 | 7.064 | 0.112 |
| ES1899   | Uncharacterized protein OS=Homo sapiens GN=RLP3 PE=3 SV=1 - [ESR19_HUMAN]                                 | 4.18567 | 4.73067 | 3.09267 | 3.82567 | 7.622 | 7.675 | 7.490 | 7.583 | 7.648 | 7.536 | 0.112 |
| P62424   | 60S ribosomal protein L2a OS=Homo sapiens GN=RLP2A PE=1 SV=2 - [RL2A_HUMAN]                               | 1.86868 | 1.12688 | 1.07868 | 1.16768 | 8.271 | 8.052 | 8.032 | 8.037 | 8.161 | 8.050 | 0.112 |
| P49588   | Nuclear autoantigenic sperm protein OS=Homo sapiens GN=NASP PE=1 SV=2 - [SYG2_HUMAN]                      | 1.46467 | 1.03867 | 0.99267 | 1.05467 | 7.529 | 7.465 | 7.407 | 7.447 | 7.545 | 7.431 | 0.112 |
| P78527   | DNA-dependent protein kinase catalytic subunit OS=Homo sapiens GN=PRKDC PE=1 SV=3 - [PRKDC_HUMAN]         | 2.17967 | 2.00767 | 1.54267 | 1.70067 | 7.338 | 7.303 | 7.188 | 7.230 | 7.320 | 7.209 | 0.111 |
| A03660-2 | Isomorf 2 of Pleiotropic regulator 1 OS=Homo sapiens GN=PLRG1 - [PLRG1_HUMAN]                             | 1.53866 | 2.31266 |         | 2.66866 | 6.711 | 6.364 |       | 6.426 | 6.537 | 6.426 | 0.111 |
| P62495   | Eukaryotic peptide chain release factor subunit 1 OS=Homo sapiens GN=EF1F PE=1 SV=3 - [ERF1_HUMAN]        | 3.61967 | 2.64567 | 2.26367 | 2.53667 | 7.559 | 7.422 | 7.355 | 7.404 | 7.491 | 7.379 | 0.111 |
| P62701   | 40S ribosomal protein S4, isoform OS=Homo sapiens GN=PS4A PE=1 SV=2 - [RSM4_HUMAN]                        | 8.98767 | 6.91867 | 6.17167 | 6.04267 | 7.954 | 7.840 | 7.790 | 7.781 | 7.897 | 7.778 | 0.111 |
| P14868   | Nucleoside diphosphate kinase type-1 OS=Homo sapiens GN=NDPK1 PE=1 SV=2 - [SVDC_HUMAN]                    | 2.16467 | 1.62267 | 1.09667 | 1.12967 | 7.968 | 7.824 | 7.698 | 7.815 | 7.928 | 7.816 | 0.111 |
| Q9P9P9   | Dynein light chain roadblock-type 1 OS=Homo sapiens GN=DLNB1 PE=1 SV=3 - [DLNB1_HUMAN]                    | 2.97167 | 3.00267 | 2.10467 | 2.54667 | 7.473 | 7.477 | 7.323 | 7.408 | 7.475 | 7.364 | 0.111 |
| P51665   | 26S proteasome non-ATPase regulatory subunit 7 OS=Homo sapiens GN=PSMD7 PE=1 SV=2 - [PS07_HUMAN]          | 3.64567 | 3.04867 | 2.52967 | 2.64067 | 7.562 | 7.484 | 7.403 | 7.422 | 7.523 | 7.411 | 0.111 |
| P08758   | Anexin A5 OS=Homo sapiens GN=ANXA5 PE=1 SV=2 - [ANXA5_HUMAN]                                              | 1.04468 | 9.61767 | 7.54667 | 7.99767 | 7.819 | 7.983 | 7.878 | 7.903 | 8.001 | 7.890 | 0.110 |
| C9A336   | Uncharacterized protein OS=Homo sapiens GN=NP1B3 PE=3 SV=1 - [C9A336_HUMAN]                               | 1.08667 | 1.00027 | 7.42166 | 8.13866 | 7.409 | 7.001 | 6.870 | 6.911 | 7.001 | 6.890 | 0.110 |
| Q00231   | 26S proteasome core protein OS=Homo sapiens GN=PSMD1 PE=1 SV=3 - [PSD1_HU]                                | 3.08667 | 2.71867 | 2.07667 | 2.46567 | 7.889 | 7.216 | 7.087 | 7.385 | 7.515 | 7.411 | 0.110 |
| Q9Y333   | Nucleosome assembly protein 1-like 4 OS=Homo sapiens GN=NAP1L4 PE=1 SV=1 - [NAP1L4_HUMAN]                 | 5.09967 | 3.27067 | 3.10267 | 3.24167 | 7.708 | 7.514 | 7.492 | 7.511 | 7.611 | 7.501 | 0.110 |
| Q9Y3C8   | Ubiquitin-fold modifier-conjugating enzyme 1 OS=Homo sapiens GN=UFC1 PE=1 SV=3 - [UFC1_HUMAN]             | 6.10566 | 4.74366 |         |         | 6.878 | 6.676 |       | 6.786 | 6.877 | 6.766 | 0.110 |
| B46086   | Uncharacterized protein OS=Homo sapiens GN=IP05 PE=2 SV=1 - [B46086_HUMAN]                                | 1.93567 | 2.70966 | 1.23567 | 6.82866 | 7.287 | 6.858 | 7.092 | 6.834 | 7.072 | 6.963 | 0.109 |
| P49499-2 | Isomorf 2 of Mannose-6-phosphate isomerase OS=Homo sapiens GN=MPI - [MPI_HUMAN]                           | 1.49027 | 1.26967 | 1.24967 | 0.19866 | 7.174 | 7.103 | 7.059 | 6.964 | 7.139 | 7.029 | 0.109 |
| Q124H2   | Formylglyoxal lyase OS=Homo sapiens GN=SMI2 PE=1 SV=2 - [SMI2_HUMAN]                                      | 1.66267 | 5.42067 |         | 8.94967 | 7.626 | 7.734 |       | 7.447 | 7.447 | 7.445 | 0.109 |
| B72566   | Uncharacterized protein OS=Homo sapiens GN=UBA5 PE=2 SV=1 - [B72566_HUMAN]                                | 1.77467 | 1.34867 | 1.34867 | 1.41567 | 7.240 | 7.130 | 7.151 | 7.249 | 7.140 | 7.140 | 0.109 |
| P34932   | Heat shock 70 kDa protein 4 OS=Homo sapiens GN=HSPM4 PE=1 SV=4 - [HSP74_HUMAN]                            | 6.88567 | 5.75067 | 4.66167 | 5.15867 | 7.838 | 7.760 | 7.668 | 7.712 | 7.799 | 7.690 | 0.109 |
| Q8H183   | Mitotin, mitochondrial OS=Homo sapiens GN=NDUF42 PE=1 SV=1 - [MMIT_HUMAN]                                 | 1.08967 | 8.32166 | 8.31966 | 6.62466 | 7.037 | 6.920 | 6.920 | 6.821 | 6.979 | 6.871 | 0.108 |
| P67936   | Tropomyosin alpha-4 chain OS=Homo sapiens GN=TPMA PE=1 SV=3 - [TPMA_HUMAN]                                | 1.38868 | 1.73867 | 9.19467 | 9.12867 | 8.142 | 8.690 | 7.964 | 7.865 | 8.076 | 7.980 | 0.108 |
| Q9297-2  | Isomorf 2 of Transcription factor 12 OS=Homo sapiens GN=TF12 PE=1 SV=1 - [TF12_HUMAN]                     | 1.40367 | 1.09267 | 1.05267 | 1.10967 | 7.282 | 7.102 | 7.051 | 7.128 | 7.211 | 7.103 | 0.108 |
| P49773   | Histidine triad nucleotide-binding protein 1 OS=Homo sapiens GN=HNT1 PE=1 SV=2 - [HNT1_HUMAN]             | 7.30767 | 7.22267 | 5.56367 | 5.78067 | 7.864 | 7.859 | 7.745 | 7.762 | 7.861 | 7.754 | 0.108 |
| A03852   | Calumenin OS=Homo sapiens GN=CALU PE=1 SV=2 - [CALU_HUMAN]                                                | 3.20667 | 1.64567 | 1.80367 | 1.78467 | 7.506 | 7.216 | 7.256 | 7.251 | 7.361 | 7.254 | 0.107 |
| Q90755   | Serine/arginine-rich splicing factor 1 OS=Homo sapiens GN=SRSF1 PE=1 SV=2 - [SRSF1_HUMAN]                 | 4.34367 | 3.37567 | 3.52167 | 2.54167 | 7.638 | 7.528 | 7.547 | 7.405 | 7.583 | 7.476 | 0.107 |
| P61160   | Actin-related protein 7 OS=Homo sapiens GN=ACTR7 PE=1 SV=1 - [ARP7_HUMAN]                                 | 2.26167 | 0.83066 | 0.36266 | 1.16567 | 7.354 | 6.919 | 6.926 | 7.134 | 7.137 | 7.030 | 0.107 |
| P49331   | Nucleoside diphosphate kinase type-1 OS=Homo sapiens GN=NDPK1 PE=1 SV=2 - [SVDC_HUMAN]                    | 4.40367 | 2.82567 | 2.07667 | 2.46567 | 7.899 | 7.835 | 7.698 | 7.835 | 7.921 | 7.816 | 0.107 |
| P78347-2 | Isomorf 2 of General transcription factor II-H OS=Homo sapiens GN=GTIF2 - [GTIF2_HUMAN]                   | 1.42067 | 1.49667 | 1.03867 | 1.25467 | 7.152 | 7.175 | 7.016 | 7.098 | 7.164 | 7.057 | 0.106 |
| Q8H4V1   | Membrane magnesium transporter 1 OS=Homo sapiens GN=MMGT1 PE=1 SV=1 - [MMGT1_HUMAN]                       | 2.12367 | 1.74416 | 1.08667 | 7.32267 | 6.872 | 6.812 | 6.993 | 7.099 | 6.993 | 6.903 | 0.106 |
| A03684-2 | Isomorf 2 of Mitotic checkpoint protein BUB3 OS=Homo sapiens GN=BUB3 - [BUB3_HUMAN]                       | 2.17467 | 1.66667 | 1.71167 | 1.51367 | 7.337 | 7.222 | 7.168 | 7.180 | 7.280 | 7.174 | 0.106 |
| P15497   | Keratin, type I cytoskeletal 5 OS=Homo sapiens GN=KIF1 PE=1 SV=2 - [RSM4_HUMAN]                           | 1.04267 | 8.02867 | 8.02867 | 8.02867 | 8.018 | 7.905 | 7.805 | 7.906 | 7.961 | 7.856 | 0.106 |
| P10768   | Formylglyoxal lyase OS=Homo sapiens GN=SMI2 PE=1 SV=2 - [SMI2_HUMAN]                                      | 1.66267 | 3.70767 | 2.93367 | 3.64367 | 7.527 | 7.637 | 7.527 | 7.637 | 7.742 | 7.637 | 0.106 |
| E7E983   | Uncharacterized protein OS=Homo sapiens GN=RLP14 PE=4 SV=1 - [E7E983_HUMAN]                               | 1.11568 | 1.61567 | 7.22167 | 5.86467 | 8.047 | 7.789 | 7.859 | 7.768 | 7.918 | 7.813 | 0.105 |
| B4E2W0   | Uncharacterized protein OS=Homo sapiens GN=HADHB PE=2 SV=1 - [B4E2W0_HUMAN]                               | 1.23467 | 1.23867 | 9.70666 | 9.72966 | 7.091 | 7.093 | 6.988 | 7.092 | 6.988 | 6.988 | 0.105 |
| P43686   | 26S proteasome regulatory subunit B6 OS=Homo sapiens GN=PSMC6 PE=1 SV=2 - [PRSB6_HUMAN]                   | 4.23567 | 3.76167 | 3.06567 | 3.21367 | 7.627 | 7.575 | 7.486 | 7.507 | 7.601 | 7.497 | 0.104 |
| P26441   | Etrogens beta-1 OS=Homo sapiens GN=ESR1 PE=1 SV=1 - [ERBB1_HUMAN]                                         | 1.02667 | 1.51867 | 0.31567 | 0.31567 | 8.268 | 8.155 | 8.098 | 8.126 | 8.211 | 8.107 | 0.104 |
| P62269   | 45S ribosomal protein L8 OS=Homo sapiens GN=RLP8 PE=1 SV=3 - [RSL8_HUMAN]                                 | 9.78667 | 5.58267 | 5.97567 | 6.05367 | 7.991 | 7.747 | 7.747 | 7.869 | 7.964 | 7.856 | 0.104 |
| P09211   | Glutathione S-transferase                                                                                 |         |         |         |         |       |       |       |       |       |       |       |

|          |                                                                                                                      |         |         |         |         |        |       |       |       |       |
|----------|----------------------------------------------------------------------------------------------------------------------|---------|---------|---------|---------|--------|-------|-------|-------|-------|
| Q98X93   | N-alpha-acetyltransferase 15, NAIA auxiliary subunit OS=Homo sapiens GN=NAI15 PE=1 SV=1 - [NAI15_HUMAN]              | 3.9196E | 3.3636E | 3.1286E | 6.593   | 6.527  | 6.495 | 6.593 | 6.511 | 0.082 |
| P93566   | Adenylylsuccinate lyase OS=Homo sapiens GN=ADSL PE=1 SV=2 - [P93566_HUMAN]                                           | 2.3496E | 1.1107E | 1.1987E | 7.371   | 7.168  | 7.045 | 7.130 | 7.087 | 0.082 |
| Q14683   | Structural maintenance of chromosomes protein 1A OS=Homo sapiens GN=SMC1A PE=1 SV=2 - [SMC1A_HUMAN]                  | 5.1513E | 4.7326E | 4.1686E | 6.712   | 6.675  | 6.603 | 6.620 | 6.656 | 0.082 |
| EP9117   | Uncharacterized protein OS=Homo sapiens GN=ATPS1 PE=4 SV=1 - [EP9117_HUMAN]                                          | 1.4178E | 8.8175E | 9.7596E | 7.151   | 6.945  | 6.944 | 6.989 | 7.048 | 0.082 |
| P10412   | Histone H1.4 OS=Homo sapiens GN=HIST1H1E PE=1 SV=2 - [H14_HUMAN]                                                     | 1.3077E | 1.0466E | 1.0258E | 8.116   | 8.019  | 7.958 | 8.014 | 8.068 | 0.082 |
| Q43776   | Asparaginyl-tRNA synthetase, cytoplasmic OS=Homo sapiens GN=NARS PE=1 SV=1 - [SYNC_HUMAN]                            | 2.2257E | 2.0647E | 1.7517E | 8.027   | 7.317  | 7.243 | 7.256 | 7.331 | 0.249 |
| G3JAL7   | Puative uncharacterized protein LOC133819 OS=Homo sapiens GN=PRRC1 PE=4 SV=1 - [G3JAL7_HUMAN]                        | 8.0506E | 7.9626E | 7.2006E | 6.906   | 6.901  | 6.861 | 6.783 | 6.903 | 0.082 |
| P54136   | Agonyrin-like protein 2 OS=Homo sapiens GN=AGRYN2 PE=1 SV=2 - [AGRYN2_HUMAN]                                         | 2.2847E | 1.4387E | 1.4746E | 7.248   | 7.248  | 7.248 | 7.248 | 7.248 | 0.082 |
| P49755   | Transmembrane emp24 domain-containing protein 10 OS=Homo sapiens GN=TMED10 PE=1 SV=2 - [TMED4_HUMAN]                 | 2.0102E | 1.5552E | 1.4957E | 7.303   | 7.192  | 7.162 | 7.175 | 7.247 | 0.079 |
| Q15287-3 | Isomorph 3 of RNA-binding protein with serine-rich domain 1 OS=Homo sapiens GN=RNPS1 - [RNPS1_HUMAN]                 | 1.9217E | 1.4127E | 1.3047E | 7.283   | 7.150  | 7.160 | 7.217 | 7.138 | 0.079 |
| PE2854   | 40S ribosomal protein S26 OS=Homo sapiens GN=RS26 PE=1 SV=3 - [RS26_HUMAN]                                           | 9.0187E | 5.5937E | 5.9637E | 5.8837E | 7.955  | 7.748 | 7.770 | 7.851 | 0.079 |
| AK1184   | COP9 constitutive photomorphogenic homolog subunit 8 (Arabalopods), isoform CRA_b OS=Homo sapiens GN=40S             | 3.7887E | 6.4416E | 1.3047E | 7.978   | 6.809  | 7.115 | 7.070 | 7.194 | 0.078 |
| P21296   | FACT complex subunit 3 OS=Homo sapiens GN=FACT3 PE=1 SV=1 - [FACT3_HUMAN]                                            | 1.3448E | 1.0206E | 1.1168E | 8.234   | 8.018  | 8.046 | 8.048 | 8.125 | 0.078 |
| P62826   | GTP-binding nuclear protein Ran OS=Homo sapiens GN=NRAN PE=1 SV=3 - [RAN_HUMAN]                                      | 2.8977E | 1.8148E | 1.8898E | 1.9448E | 8.462  | 8.259 | 8.276 | 8.289 | 0.078 |
| P00387-2 | Isomorph 2 of NADH-cytochrome b5 reductase 3 OS=Homo sapiens GN=CYBR53 - [NBSR3_HUMAN]                               | 1.9017E | 2.7687E | 2.0107E | 7.279   | 7.442  | 7.262 | 7.263 | 7.360 | 0.078 |
| Q9UK55   | Huntingtin-interacting protein K OS=Homo sapiens GN=HYPK PE=1 SV=2 - [HYPK_HUMAN]                                    | 1.5107E | 1.2927E | 1.0287E | 1.3277E | 7.179  | 7.111 | 7.012 | 7.123 | 0.078 |
| P40ZP5   | Uncharacterized protein OS=Homo sapiens GN=DOB1 PE=1 SV=1 - [P40ZP5_HUMAN]                                           | 2.7347E | 2.5787E | 2.1717E | 2.2907E | 7.440  | 7.411 | 7.337 | 7.360 | 0.077 |
| Q97893   | FACT complex subunit 1 OS=Homo sapiens GN=FACT1 PE=1 SV=1 - [SPFH1_HUMAN]                                            | 1.2487E | 2.2487E | 1.9207E | 7.257   | 7.502  | 7.253 | 7.202 | 7.304 | 0.077 |
| P14618   | Pyruvate kinase isozymes M1/M2 OS=Homo sapiens GN=PKM2 PE=1 SV=4 - [PKYM_HUMAN]                                      | 4.1798E | 3.5248E | 3.2268E | 3.2208E | 8.621  | 8.547 | 8.509 | 8.508 | 0.076 |
| P53327-2 | Isomorph 2 of Tumor protein D52 OS=Homo sapiens GN=TP52 - [TP52_HUMAN]                                               | 1.0107E | 1.0107E | 8.4775E | 8.5296E | 7.004  | 7.004 | 6.928 | 6.931 | 0.070 |
| F2Z3AS   | Uncharacterized protein OS=Homo sapiens GN=RLP3 PE=3 SV=1 - [F2Z3AS_HUMAN]                                           | 1.9988E | 1.2448E | 1.1838E | 1.1938E | 8.204  | 8.095 | 8.073 | 8.149 | 0.075 |
| Q98988   | UPF055 subunit C10orf10 OS=Homo sapiens GN=C10orf10 PE=1 SV=1 - [C5D10_HUMAN]                                        | 2.5917E | 1.2807E | 1.3017E | 1.8137E | 7.474  | 7.107 | 7.114 | 7.258 | 0.074 |
| C531AS   | Uncharacterized protein OS=Homo sapiens GN=C5orf101 PE=1 SV=1 - [C531AS_HUMAN]                                       | 1.9382E | 2.2487E | 2.8937E | 2.8937E | 7.266  | 7.266 | 7.266 | 7.266 | 0.074 |
| Q864U2-2 | Isomorph 2 of Polyadenylate-binding protein 2 OS=Homo sapiens GN=PABP1 - [PABR2_HUMAN]                               | 3.4957E | 4.1527E | 2.7027E | 1.3077E | 7.533  | 7.162 | 7.432 | 7.116 | 0.074 |
| P23528   | Cofilin-1 OS=Homo sapiens GN=COF1 PE=1 SV=3 - [COF1_HUMAN]                                                           | 4.5748E | 4.1268E | 3.6178E | 3.7278E | 8.660  | 8.616 | 8.558 | 8.571 | 0.073 |
| PE2491   | Ras-related protein Rab-11A OS=Homo sapiens GN=RAB11A PE=1 SV=3 - [RBI1A_HUMAN]                                      | 3.3397E | 2.0727E | 1.9917E | 2.6377E | 7.549  | 7.317 | 7.299 | 7.421 | 0.073 |
| Q98929   | Copine-1 OS=Homo sapiens GN=CPN1 PE=1 SV=1 - [CPN1_HUMAN]                                                            | 1.2897E | 9.9556E | 9.8286E | 9.1331E | 7.110  | 6.998 | 6.992 | 6.970 | 0.073 |
| Q91747   | ADP-ribosyltransferase 1 OS=Homo sapiens GN=ART1 PE=1 SV=3 - [GGA2_HUMAN]                                            | 1.3945E | 1.3945E | 1.3945E | 1.3945E | 6.924  | 6.924 | 6.924 | 6.924 | 0.073 |
| C53CE3   | Ewing sarcoma breakpoint region 1, isoform CRA_e OS=Homo sapiens GN=EWSR1 PE=4 SV=1 - [CSG3E3_HUMAN]                 | 1.6927E | 1.7197E | 1.1697E | 1.7847E | 7.229  | 7.235 | 7.068 | 7.251 | 0.072 |
| Q00264   | Membrane-associated progesterone receptor component 1 OS=Homo sapiens GN=PMR1 PE=1 SV=3 - [PMR1_HUMAN]               | 2.7997E | 6.6557E | 4.9227E | 4.9477E | 7.863  | 7.668 | 7.692 | 7.694 | 0.072 |
| BT7403   | Uncharacterized protein OS=Homo sapiens GN=GLD04 PE=2 SV=1 - [BT7403_HUMAN]                                          | 3.5567E | 1.4037E | 1.8937E | 1.8937E | 7.551  | 7.147 | 7.277 | 7.349 | 0.072 |
| P60174   | Trotophosphatase isomerase OS=Homo sapiens GN=TPPI PE=1 SV=2 - [TPPI_HUMAN]                                          | 6.1168E | 3.2628E | 3.6858E | 3.8878E | 8.786  | 8.513 | 8.566 | 8.590 | 0.072 |
| P19445   | 40S ribosomal protein S23 OS=Homo sapiens GN=RS23 PE=1 SV=1 - [ACTC_HUMAN]                                           | 4.2288E | 3.4288E | 3.4288E | 3.4288E | 7.588  | 7.588 | 7.588 | 7.588 | 0.072 |
| P49026   | Malate dehydrogenase, mitochondrial OS=Homo sapiens GN=MDH2 PE=1 SV=3 - [MDHM_HUMAN]                                 | 3.9048E | 3.2928E | 3.0308E | 3.0488E | 8.592  | 8.517 | 8.482 | 8.484 | 0.072 |
| P68032   | Actin, alpha cardiac muscle 1 OS=Homo sapiens GN=ACTC1 PE=1 SV=1 - [ACTC_HUMAN]                                      | 8.9188E | 7.8858E | 7.3258E | 7.6238E | 8.992  | 8.897 | 8.865 | 8.882 | 0.071 |
| PE6748-2 | Isomorph 2 of Nucleohistomin OS=Homo sapiens GN=NPM1 - [NPM_HUMAN]                                                   | 6.4978E | 6.1248E | 5.2218E | 5.5028E | 8.813  | 8.787 | 8.781 | 8.800 | 0.071 |
| D684F8   | Uncharacterized protein OS=Homo sapiens GN=HRNP PE=4 SV=1 - [D684F8_HUMAN]                                           | 1.7908E | 1.1578E | 1.2778E | 1.1718E | 8.253  | 8.063 | 8.106 | 8.069 | 0.071 |
| Q15372   | Uncharacterized protein OS=Homo sapiens GN=EIF3 PE=1 SV=1 - [EIF3H_HUMAN]                                            | 1.8567E | 2.8797E | 2.8797E | 2.8797E | 7.266  | 7.266 | 7.266 | 7.266 | 0.071 |
| E7ER24   | Uncharacterized protein OS=Homo sapiens GN=PMPCB PE=3 SV=1 - [E7ER24_HUMAN]                                          | 1.9177E | 1.6567E | 1.5667E | 1.4677E | 7.283  | 7.219 | 7.195 | 7.166 | 0.070 |
| PE2266   | 40S ribosomal protein S23 OS=Homo sapiens GN=RS23 PE=1 SV=3 - [RS23_HUMAN]                                           | 6.6817E | 5.2287E | 4.7727E | 5.3177E | 7.825  | 7.718 | 7.679 | 7.772 | 0.070 |
| Q973U8   | 60S ribosomal protein L36 OS=Homo sapiens GN=RLP36 PE=1 SV=3 - [RL36_HUMAN]                                          | 4.9257E | 3.2357E | 3.4067E | 3.4237E | 7.926  | 7.512 | 7.532 | 7.534 | 0.069 |
| Q973U5   | Ribosome maturation protein SBD5 OS=Homo sapiens GN=SBD5 PE=1 SV=4 - [SBD5_HUMAN]                                    | 6.6937E | 1.5777E | 1.4487E | 1.2497E | 7.198  | 7.161 | 7.097 | 7.198 | 0.069 |
| Q92488-2 | Isomorph 2 of Eukaryotic translation initiation factor 3 subunit 1 OS=Homo sapiens GN=EIF3 PE=1 SV=1 - [EIF3B_HUMAN] | 1.9558E | 1.0588E | 8.5247E | 8.9077E | 8.040  | 8.023 | 7.931 | 7.995 | 0.068 |
| P25398   | 40S ribosomal protein S12 OS=Homo sapiens GN=RS12 PE=1 SV=3 - [RS12_HUMAN]                                           | 1.0928E | 2.1858E | 1.8457E | 1.9977E | 7.343  | 7.339 | 7.266 | 7.279 | 0.068 |
| Q51760   | Splicing factor, arginine/serine-rich 11 (Fragment) OS=Homo sapiens GN=SF3B1 PE=2 SV=1 - [Q51760_HUMAN]              | 4.9907E | 3.1807E | 3.2717E | 3.5467E | 7.688  | 7.502 | 7.515 | 7.550 | 0.068 |
| PE3501   | Serine/threonine protein phosphatase 5 OS=Homo sapiens GN=PPP5C PE=1 SV=1 - [PPP5_HUMAN]                             | 1.6007E | 1.6007E | 1.3817E | 1.3567E | 7.957  | 7.204 | 7.140 | 7.132 | 0.068 |
| PE2906   | Uncharacterized protein OS=Homo sapiens GN=RL1A PE=1 SV=2 - [RL1A_HUMAN]                                             | 0.0667E | 7.0287E | 6.7887E | 6.7887E | 7.987  | 7.849 | 7.849 | 7.849 | 0.068 |
| Q9YQ44   | Glutamate dehydrogenase OS=Homo sapiens GN=GLUD1 PE=3 SV=1 - [FGYQ44_HUMAN]                                          | 2.5688E | 2.9357E | 2.2267E | 2.4787E | 7.410  | 7.468 | 7.347 | 7.394 | 0.068 |
| Q9Y3C4   | TP53RK-binding protein OS=Homo sapiens GN=TP53RK PE=1 SV=1 - [TP53RK_HUMAN]                                          | 4.6955E | 4.6276E | 3.3396E | 3.3396E | 6.622  | 6.622 | 6.622 | 6.622 | 0.068 |
| Q92958   | Protein RC2/28 OS=Homo sapiens GN=RC2 PE=1 SV=2 - [RC2_HUMAN]                                                        | 2.5177E | 1.7787E | 1.9527E | 1.6827E | 7.401  | 7.250 | 7.290 | 7.226 | 0.067 |
| Q80XK5   | DnaJ homology subfamily C member 9 OS=Homo sapiens GN=DNAJ9 PE=1 SV=1 - [DNJC9_HUMAN]                                | 1.7487E | 2.3807E | 2.1587E | 1.6827E | 7.241  | 7.376 | 7.376 | 7.376 | 0.067 |
| P11021   | 78 kDa glycosylated protein OS=Homo sapiens GN=HSPA5 PE=1 SV=1 - [GRP78_HUMAN]                                       | 1.3148E | 1.1839E | 1.1839E | 1.1839E | 8.348E | 8.269 | 8.269 | 8.269 | 0.067 |
| PE8708   | 40S ribosomal protein S17 OS=Homo sapiens GN=RS17 PE=1 SV=2 - [RS17_HUMAN]                                           | 1.5968E | 7.9827E | 7.2097E | 1.3028E | 8.203  | 7.902 | 7.858 | 8.115 | 0.067 |
| Q80MS2-2 | Isomorph 2 of Protein enabled homolog OS=Homo sapiens GN=ENAH - [ENAH_HUMAN]                                         | 1.7467E | 1.1427E | 1.4187E | 1.0377E | 7.242  | 7.058 | 7.152 | 7.016 | 0.066 |
| B4DEK4   | Uncharacterized protein OS=Homo sapiens GN=SNQ2 PE=2 SV=1 - [B4DEK4_HUMAN]                                           | 1.2717E | 9.8446E | 8.9596E | 1.0747E | 7.104  | 6.993 | 6.934 | 7.031 | 0.066 |
| P26816   | Proteasome subunit beta type-1 OS=Homo sapiens GN=PSMB1 PE=1 SV=2 - [PSB1_HUMAN]                                     | 2.9872E | 2.6247E | 2.4357E | 2.3777E | 7.475  | 7.199 | 7.386 | 7.376 | 0.066 |
| Q14989   | Euphorbia 1 OS=Homo sapiens GN=EUPL1 PE=1 SV=1 - [EUP1_HUMAN]                                                        | 1.1767E | 1.1767E | 1.1767E | 1.1767E | 7.084  | 7.084 | 7.084 | 7.084 | 0.066 |
| P58162   | Phosphorylase OS=Homo sapiens GN=PYGL PE=3 SV=1 - [F58162_HUMAN]                                                     | 1.9347E | 2.6127E | 1.8847E | 1.9897E | 7.286  | 7.417 | 7.275 | 7.299 | 0.066 |
| Q15427   | Splicing factor 3B subunit 4 OS=Homo sapiens GN=SF3B4 PE=1 SV=1 - [SF3B4_HUMAN]                                      | 1.2207E | 1.0747E | 1.1097E | 8.7726E | 7.086  | 7.031 | 7.059 | 7.052 | 0.065 |
| P28074   | Proteasome subunit beta type-5 OS=Homo sapiens GN=PSMB5 PE=1 SV=3 - [PSB5_HUMAN]                                     | 2.6997E | 1.7637E | 1.3687E | 1.5987E | 7.222  | 7.246 | 7.136 | 7.203 | 0.064 |
| Q92957   | Ras-related protein Rab-1A OS=Homo sapiens GN=RAB1A PE=1 SV=1 - [RAB1A_HUMAN]                                        | 1.5148E | 1.0397E | 1.1187E | 1.2977E | 7.573  | 7.380 | 7.491 | 7.406 | 0.064 |
| P09561   | U2 small nuclear ribonucleoprotein A OS=Homo sapiens GN=SNRPA1 PE=1 SV=2 - [RU2A_HUMAN]                              | 2.9147E | 2.3527E | 1.9397E | 2.5637E | 7.465  | 7.269 | 7.299 | 7.364 | 0.064 |
| Q972W6   | 39S ribosomal protein L46, mitochondrial OS=Homo sapiens GN=MRPL46 PE=1 SV=1 - [RM46_HUMAN]                          | 1.7207E | 1.2077E | 1.2457E | 1.2457E | 7.236  | 7.082 | 7.095 | 7.159 | 0.063 |
| P27797   | Carectulin OS=Homo sapiens GN=CALR PE=1 SV=1 - [CALR_HUMAN]                                                          | 1.6948E | 1.2228E | 1.2318E | 1.2578E | 8.229  | 8.087 | 8.090 | 8.158 | 0.063 |
| D3Y718   | Uncharacterized protein OS=Homo sapiens GN=RLP32 PE=4 SV=1 - [D3Y718_HUMAN]                                          | 1.1258E | 7.6327E | 8.7137E | 7.8997E | 8.051  | 7.883 | 7.940 | 7.869 | 0.063 |
| P46777   | 60S ribosomal protein L5 OS=Homo sapiens GN=RLP5 PE=1 SV=1 - [R5_HUMAN]                                              | 8.1818E | 8.2827E | 8.5887E | 8.1818E | 8.140  | 8.140 | 8.140 | 8.140 | 0.063 |
| Q80ND1   | Acetyl-CoA acetyltransferase, cytosolic OS=Homo sapiens GN=ACAT2 PE=1 SV=2 - [THIC_HUMAN]                            | 2.9067E | 2.9817E | 2.6217E | 2.4867E | 7.463  | 7.474 | 7.419 | 7.468 | 0.062 |
| EP9E68   | Uncharacterized protein OS=Homo sapiens GN=HSPAL PE=1 SV=1 - [EP9E68_HUMAN]                                          | 2.4057E | 1.5947E | 1.6147E | 1.7887E | 7.381  | 7.203 | 7.202 | 7.292 | 0.062 |
| B3KW71   | Quinoid dihydropteridine reductase, isoform CRA_e OS=Homo sapiens GN=QDR PE=2 SV=1 - [B3KW71_HUMAN]                  | 8.0146E | 7.1026E | 6.8166E | 6.8166E | 6.904  | 6.808 | 6.854 | 6.904 | 0.062 |
| Q91Q02   | Proliferation-associated protein ZGA OS=Homo sapiens GN=PAGZA PE=1 SV=3 - [PAGZA_HUMAN]                              | 9.1688E | 1.1198E | 8.5807E | 9.0227E | 7.962  | 6.899 | 6.934 | 7.965 | 0.061 |
| P46249   | Uncharacterized protein OS=Homo sapiens GN=SPR4 PE=1 SV=1 - [SPR4_HUMAN]                                             | 0.0007E | 6.1887E | 6.1887E | 6.1887E | 6.049  | 6.049 | 6.049 | 6.049 | 0.061 |
| P46282   | 40S ribosomal protein S5 OS=Homo sapiens GN=RS5 PE=1 SV=4 - [RS5_HUMAN]                                              | 8.0077E | 5.8987E | 5.9617E | 5.9297E | 7.903  | 7.717 | 7.715 | 7.716 | 0.061 |
| F8W7K3   | Uncharacterized protein OS=Homo sapiens GN=SP1AN1 PE=4 SV=1 - [F8W7K3_HUMAN]                                         | 9.6806E | 7.8496E | 7.7056E | 7.4056E | 6.986  | 6.895 | 6.890 | 6.869 | 0.060 |
| Q96A83   | Isoschirimate domain-containing protein 2, mitochondrial OS=Homo sapiens GN=ISOC2 PE=1 SV=1 - [ISOC2_HUMAN]          | 1.2367E | 1.1397E | 1.0187E | 1.0187E | 7.052  | 7.056 | 7.008 | 7.092 | 0.060 |
| B4D366   | Proteasome (Prosome, macropain) 26S subunit, non-ATPase 13, isoform CRA_a OS=Homo sapiens GN=PSMI1                   | 1.2657E | 7.9426E | 9.3446E | 8.1686E | 7.120  | 6.900 | 6.971 | 6.912 | 0.060 |
| PE3313   | Thymidine phosphorylase OS=Homo sapiens GN=TPP1 PE=1 SV=1 - [TPP1_HUMAN]                                             | 1.0387E |         |         |         |        |       |       |       |       |

|                                                                                           |                                                                                                                  |         |         |         |         |       |       |       |       |       |       |        |
|-------------------------------------------------------------------------------------------|------------------------------------------------------------------------------------------------------------------|---------|---------|---------|---------|-------|-------|-------|-------|-------|-------|--------|
| P31153                                                                                    | S-adenosylmethionine synthase isoform type-2 OS=Homo sapiens GN=MAT2A PE=1 SV=1 - [METK2_HUMAN]                  | 2.37027 | 2.16127 | 2.00127 | 2.32327 | 7.375 | 7.335 | 7.301 | 7.366 | 7.355 | 7.334 | 0.021  |
| E7ERW8                                                                                    | Uncharacterized protein OS=Homo sapiens GN=DDIAP1 PE=1 SV=1 - [E7ERW8_HUMAN]                                     | 4.61926 | 3.97826 | 3.86726 | 4.12226 | 6.685 | 6.577 | 6.587 | 6.615 | 6.621 | 6.601 | 0.020  |
| 940397                                                                                    | Uncharacterized protein OS=Homo sapiens GN=SNRPD3 PE=2 SV=1 - [940397_HUMAN]                                     | 1.17038 | 7.93273 | 9.93027 | 8.50727 | 8.026 | 7.897 | 7.920 | 7.967 | 7.967 | 7.967 | 0.016  |
| P11977                                                                                    | Plastin-3 OS=Homo sapiens GN=PLS3 PE=1 SV=4 - [PLS3_HUMAN]                                                       | 4.44727 | 5.30727 | 4.73927 | 4.56727 | 7.648 | 7.725 | 7.676 | 7.680 | 7.686 | 7.688 | 0.019  |
| Q9MJU7                                                                                    | ATP-dependent RNA helicase DDX19A OS=Homo sapiens GN=DDX19A PE=1 SV=1 - [DDX19A_HUMAN]                           | 1.73727 | 1.92527 | 1.75627 | 1.82727 | 7.240 | 7.284 | 7.251 | 7.262 | 7.243 | 7.243 | 0.019  |
| Q98252                                                                                    | Endoplasmic reticulum resident protein 44 OS=Homo sapiens GN=ERP44 PE=1 SV=1 - [ERP44_HUMAN]                     | 8.06126 | 8.19426 | 8.19426 | 7.28126 | 6.906 | 6.913 | 6.862 | 6.906 | 6.888 | 6.888 | 0.019  |
| Q9H4N9                                                                                    | SNRPC protein OS=Homo sapiens GN=SNRPG PE=4 SV=1 - [Q9H4N9_HUMAN]                                                | 4.33927 | 4.87527 | 4.51427 | 4.39427 | 7.637 | 7.688 | 7.655 | 7.643 | 7.663 | 7.644 | 0.014  |
| C530K3                                                                                    | Uncharacterized protein OS=Homo sapiens GN=OR8K3 PE=1 SV=1 - [OR8K3_HUMAN]                                       | 3.49528 | 3.49528 | 2.64328 | 3.49528 | 6.307 | 6.307 | 6.422 | 6.459 | 6.459 | 6.451 | 0.014  |
| E9PQ08                                                                                    | Uncharacterized protein OS=Homo sapiens GN=SLUGL2 PE=4 SV=1 - [E9PQ08_HUMAN]                                     | 7.59726 | 6.46226 | 5.99826 | 5.98626 | 6.881 | 6.670 | 6.673 | 6.755 | 6.753 | 6.763 | 0.012  |
| Q9UM54                                                                                    | Pre-mRNA-processing factor 19 OS=Homo sapiens GN=PRPF19 PE=1 SV=1 - [PRPF19_HUMAN]                               | 2.70227 | 4.50127 | 3.30827 | 3.30827 | 7.432 | 7.653 | 7.422 | 7.520 | 7.543 | 7.531 | 0.012  |
| B4DFL2                                                                                    | Isochorate dehydrogenase [NADP] OS=Homo sapiens GN=IDH2 PE=2 SV=1 - [B4DFL2_HUMAN]                               | 5.38226 | 6.97326 | 4.80826 | 4.03727 | 6.731 | 6.990 | 6.682 | 7.016 | 6.860 | 6.849 | 0.012  |
| P20E08                                                                                    | Moesin OS=Homo sapiens GN=MSN PE=1 SV=3 - [MOES_HUMAN]                                                           | 5.27627 | 3.80727 | 4.20026 | 4.41327 | 7.722 | 7.580 | 7.635 | 7.646 | 7.651 | 7.640 | 0.011  |
| P32341                                                                                    | Radioligand nuclear receptor OS=Homo sapiens GN=RXRB PE=1 SV=1 - [RXRB_HUMAN]                                    | 5.27627 | 4.41326 | 4.69226 | 4.69226 | 7.722 | 7.580 | 7.635 | 7.646 | 7.651 | 7.640 | 0.011  |
| P19338                                                                                    | Nucleolin OS=Homo sapiens GN=NCL PE=1 SV=3 - [NCL_HUMAN]                                                         | 4.38228 | 3.31328 | 3.70228 | 3.45628 | 8.642 | 8.520 | 8.568 | 8.573 | 8.581 | 8.571 | 0.010  |
| B7W099                                                                                    | Target of myb1 (Chicken) OS=Homo sapiens GN=TOM1 PE=4 SV=2 - [B7W099_HUMAN]                                      | 3.53526 | 3.22326 | 3.71026 | 3.71026 | 6.548 | 6.508 | 6.569 | 6.548 | 6.539 | 6.530 | 0.010  |
| Q92161                                                                                    | Translational activator GCN1 OS=Homo sapiens GN=GCN1L1 PE=1 SV=6 - [GCN1L1_HUMAN]                                | 1.06427 | 6.77326 | 6.65826 | 1.03727 | 7.027 | 6.831 | 6.823 | 7.016 | 6.929 | 6.920 | 0.009  |
| E7EQ23                                                                                    | Uncharacterized protein OS=Homo sapiens GN=CSPT1 PE=4 SV=1 - [E7EQ23_HUMAN]                                      | 1.16627 | 1.12727 | 1.26127 | 1.53427 | 7.067 | 7.238 | 7.101 | 7.186 | 7.152 | 7.143 | 0.009  |
| Q9H444                                                                                    | Charged multimeric body protein 4 OS=Homo sapiens GN=CM4B PE=1 SV=1 - [CM4B_HUMAN]                               | 1.51227 | 8.41326 | 1.60927 | 1.60927 | 7.180 | 6.925 | 7.035 | 7.047 | 7.052 | 7.043 | 0.009  |
| Q94837                                                                                    | Single-stranded DNA-binding protein, mitochondrial OS=Homo sapiens GN=SSBP1 PE=1 SV=1 - [SSBP_HUM]               | 1.07928 | 8.30827 | 9.18827 | 9.38727 | 8.033 | 7.920 | 7.963 | 7.973 | 7.976 | 7.968 | 0.008  |
| P98179                                                                                    | Putative RNA-binding protein 3 OS=Homo sapiens GN=RBM3 PE=1 SV=1 - [RBM3_HUMAN]                                  | 4.09027 | 2.23427 | 2.94727 | 2.98627 | 7.612 | 7.349 | 7.487 | 7.475 | 7.480 | 7.472 | 0.008  |
| Q00571                                                                                    | ATP-dependent RNA helicase DDX3X OS=Homo sapiens GN=DDX3X PE=1 SV=3 - [DDX3X_HUMAN]                              | 2.31027 | 2.62527 | 2.34627 | 2.51827 | 7.364 | 7.423 | 7.370 | 7.401 | 7.394 | 7.386 | 0.008  |
| Q9QK98                                                                                    | Uncharacterized protein OS=Homo sapiens GN=SRP8 PE=2 SV=1 - [Q9QK98_HUMAN]                                       | 1.13717 | 1.27527 | 1.17127 | 1.98326 | 7.137 | 7.105 | 7.235 | 6.993 | 7.121 | 7.114 | 0.008  |
| B7Z206                                                                                    | Uncharacterized protein OS=Homo sapiens GN=ROSL PE=2 SV=1 - [ROSL_HUMAN]                                         | 2.01527 | 1.71217 | 1.90227 | 1.76127 | 7.304 | 7.236 | 7.279 | 7.246 | 7.270 | 7.263 | 0.008  |
| P37837                                                                                    | Transaldolase OS=Homo sapiens GN=TALDO1 PE=1 SV=2 - [TALDO_HUMAN]                                                | 3.68727 | 1.46227 | 2.52327 | 2.07627 | 7.567 | 7.165 | 7.402 | 7.317 | 7.366 | 7.360 | 0.006  |
| B4C288                                                                                    | Uncharacterized protein OS=Homo sapiens GN=FAF2 PE=2 SV=1 - [B4C288_HUMAN]                                       | 1.12227 | 1.06426 | 1.35627 | 1.35627 | 7.050 | 6.957 | 7.132 | 7.050 | 7.045 | 7.005 | 0.006  |
| O95881                                                                                    | Thioredoxin domain-containing protein 12 OS=Homo sapiens GN=TXNDC12 PE=1 SV=1 - [TXNDC12_HUMAN]                  | 1.39527 | 1.34327 | 1.35327 | 1.35327 | 7.145 | 7.128 | 7.131 | 7.136 | 7.131 | 7.131 | 0.005  |
| Q9NYU2-2                                                                                  | Isoform 2 of UDP-glucosyltransferase 1 OS=Homo sapiens GN=UGT1 - [UGGT1_HUMAN]                                   | 9.91276 | 9.91276 | 8.53326 | 9.73526 | 7.044 | 6.965 | 6.931 | 6.989 | 6.965 | 6.960 | 0.004  |
| Q9Y19-2                                                                                   | Isoform 2 of UDP-glucosyltransferase 1 OS=Homo sapiens GN=UGT1 - [UGGT1_HUMAN]                                   | 1.10727 | 3.80727 | 4.23527 | 4.23527 | 7.145 | 7.031 | 7.043 | 7.033 | 7.030 | 7.030 | 0.004  |
| EPG121                                                                                    | Uncharacterized protein OS=Homo sapiens GN=TSN PE=4 SV=1 - [EPG121_HUMAN]                                        | 8.12526 | 8.91426 | 5.55626 | 1.28627 | 6.910 | 6.950 | 6.745 | 7.109 | 6.930 | 6.927 | 0.003  |
| Q14152                                                                                    | Eukaryotic translation initiation factor 3 subunit A OS=Homo sapiens GN=EIF3A PE=1 SV=1 - [EIF3A_HUMAN]          | 2.45827 | 3.00627 | 2.82327 | 2.58727 | 7.391 | 7.481 | 7.451 | 7.413 | 7.434 | 7.432 | 0.002  |
| Q00325-2                                                                                  | Isoform 2 of Phosphate carrier protein, mitochondrial OS=Homo sapiens GN=SLC25A3 - [MPCP_HUMAN]                  | 4.01327 | 2.60227 | 2.57727 | 4.01427 | 7.603 | 7.415 | 7.411 | 7.604 | 7.509 | 7.507 | 0.002  |
| Q94760-2                                                                                  | Isoform 2 of Lactoylglutathione lyase OS=Homo sapiens GN=GLI1 - [GLI1_HUMAN]                                     | 1.17028 | 5.24927 | 5.70727 | 1.06928 | 8.008 | 7.720 | 7.756 | 8.029 | 7.894 | 7.893 | 0.001  |
| Q12964-2                                                                                  | Isoform 2 of Histone acetyltransferase OS=Homo sapiens GN=HAT2 - [HAT2_HUMAN]                                    | 6.90627 | 4.94727 | 4.66427 | 4.66427 | 7.844 | 7.607 | 7.542 | 7.627 | 7.623 | 7.623 | 0.001  |
| Q9H44-2                                                                                   | Isoform 2 of Eukaryotic translation initiation factor 2A OS=Homo sapiens GN=EIF2A - [EIF2A_HUMAN]                | 5.30126 | 5.63726 | 4.99526 | 4.99526 | 6.724 | 6.724 | 6.751 | 6.699 | 6.724 | 6.725 | -0.001 |
| Q14252                                                                                    | Bifunctional 3'-phosphoadenosine 5'-phosphosulfate synthase 1 OS=Homo sapiens GN=PAPS1 PE=1 SV=2 - [PAPS1_HUMAN] | 1.06927 | 3.75526 | 8.95926 | 9.18926 | 7.029 | 6.867 | 6.944 | 6.963 | 6.948 | 6.949 | -0.001 |
| PE6780                                                                                    | Casein kinase II subunit beta OS=Homo sapiens GN=CSNK2B PE=1 SV=1 - [CSK2B_HUMAN]                                | 1.11627 | 1.39127 | 1.12927 | 1.38227 | 7.048 | 7.143 | 7.053 | 7.140 | 7.095 | 7.097 | -0.001 |
| Q60227-7                                                                                  | Isoform 7 of C-Jun-amino-terminal kinase-interacting protein OS=Homo sapiens GN=SPAG3 - [JIP4_HUMAN]             | 2.53726 | 2.49626 | 2.49626 | 2.43126 | 6.309 | 6.397 | 6.398 | 6.398 | 6.398 | 6.398 | -0.003 |
| B7Z206                                                                                    | Uncharacterized protein OS=Homo sapiens GN=ROSL PE=2 SV=1 - [ROSL_HUMAN]                                         | 2.01527 | 1.71217 | 1.90227 | 1.76127 | 7.304 | 7.236 | 7.279 | 7.246 | 7.270 | 7.263 | 0.002  |
| P06506-3                                                                                  | Isoform 3 of Heterogeneous nuclear ribonucleoprotein Q OS=Homo sapiens GN=SYNCRIP - [HNRQP_HUMAN]                | 6.05727 | 3.81627 | 4.40727 | 4.36227 | 7.782 | 7.582 | 7.644 | 7.729 | 7.682 | 7.687 | -0.005 |
| P10599                                                                                    | Thioredoxin OS=Homo sapiens GN=TXN PE=1 SV=3 - [THIO_HUMAN]                                                      | 3.81127 | 2.37727 | 2.51327 | 3.68727 | 7.781 | 7.376 | 7.400 | 7.567 | 7.479 | 7.483 | -0.005 |
| Q9F811                                                                                    | Anarasin OS=Homo sapiens GN=CIAP1N1 PE=1 SV=2 - [CFN1_HUMAN]                                                     | 1.49327 | 1.11627 | 1.34527 | 1.26827 | 7.174 | 7.048 | 7.129 | 7.103 | 7.111 | 7.116 | -0.005 |
| P61758                                                                                    | Uncharacterized protein OS=Homo sapiens GN=VBP1 PE=1 SV=3 - [P61758_HUMAN]                                       | 2.66927 | 1.99227 | 2.25327 | 2.41527 | 7.426 | 7.299 | 7.363 | 7.363 | 7.368 | 7.368 | -0.005 |
| P04181                                                                                    | Quinoline aminotransferase OS=Homo sapiens GN=QSOX1 PE=1 SV=1 - [QAT_HUMAN]                                      | 3.46927 | 3.46927 | 3.46927 | 3.46927 | 7.510 | 7.540 | 7.582 | 7.641 | 7.652 | 7.652 | -0.004 |
| P63999                                                                                    | Activated RNA polymerase II transcriptional coactivator p15 OS=Homo sapiens GN=SUB1 PE=1 SV=3 - [TCF4_HUMAN]     | 3.34027 | 1.31718 | 7.14427 | 6.57527 | 7.524 | 8.137 | 7.854 | 7.818 | 7.830 | 7.836 | -0.006 |
| D68FH4                                                                                    | Uncharacterized protein OS=Homo sapiens GN=CYSB8 PE=1 SV=1 - [D68FH4_HUMAN]                                      | 3.36727 | 3.27927 | 3.27927 | 3.47727 | 7.527 | 7.516 | 7.541 | 7.528 | 7.528 | 7.528 | -0.006 |
| FRW906                                                                                    | Adenylosuccinate synthase OS=Homo sapiens GN=ADSS PE=3 SV=1 - [FRW906_HUMAN]                                     | 1.42827 | 1.42827 | 1.44027 | 1.46227 | 7.155 | 7.159 | 7.165 | 7.155 | 7.167 | 7.167 | -0.007 |
| D15116                                                                                    | US snRNP-associated Sm-like protein LSm1 OS=Homo sapiens GN=LSM1 PE=1 SV=1 - [LSM1_HUMAN]                        | 4.73726 | 6.73726 | 6.73726 | 6.16926 | 6.681 | 6.883 | 6.790 | 6.782 | 6.792 | 6.790 | -0.008 |
| P10666                                                                                    | Uncharacterized protein OS=Homo sapiens GN=ROSL PE=2 SV=1 - [ROSL_HUMAN]                                         | 2.01527 | 1.71217 | 1.90227 | 1.76127 | 7.304 | 7.236 | 7.279 | 7.246 | 7.270 | 7.263 | -0.008 |
| Q13867                                                                                    | Bleomycin hydrolase OS=Homo sapiens GN=BLHM PE=1 SV=1 - [BLHM_HUMAN]                                             | 1.62327 | 1.12427 | 1.52327 | 1.25427 | 7.210 | 7.051 | 7.183 | 7.098 | 7.131 | 7.141 | -0.010 |
| P62312                                                                                    | US snRNP-associated Sm-like protein Lsm6 OS=Homo sapiens GN=LSM6 PE=1 SV=1 - [LSM6_HUMAN]                        | 6.12526 | 5.26626 | 5.65626 | 5.26626 | 6.787 | 6.721 | 6.765 | 6.754 | 6.765 | 6.765 | -0.011 |
| B4DM74                                                                                    | Uncharacterized protein OS=Homo sapiens GN=RLP18A PE=2 SV=1 - [B4DM74_HUMAN]                                     | 1.77327 | 1.19327 | 1.52527 | 1.46027 | 7.249 | 7.077 | 7.183 | 7.164 | 7.163 | 7.174 | -0.011 |
| Q9NR05                                                                                    | Ubiquitin-1 OS=Homo sapiens GN=UBQ1L1 PE=1 SV=2 - [UBQL1_HUMAN]                                                  | 8.43926 | 1.50227 | 1.11227 | 1.20727 | 6.926 | 7.177 | 7.046 | 7.062 | 7.052 | 7.064 | -0.013 |
| P52787                                                                                    | Uncharacterized protein OS=Homo sapiens GN=USO1 PE=1 SV=1 - [USO1_HUMAN]                                         | 4.59627 | 3.89627 | 3.89627 | 3.89627 | 6.592 | 6.592 | 6.592 | 6.592 | 6.592 | 6.592 | -0.014 |
| AK8318                                                                                    | Uncharacterized protein OS=Homo sapiens GN=PRKCSH PE=2 SV=1 - [AK8318_HUMAN]                                     | 4.89127 | 3.84927 | 4.63627 | 4.34427 | 7.689 | 7.585 | 7.666 | 7.638 | 7.637 | 7.652 | -0.015 |
| Q3KW3                                                                                     | Uncharacterized protein OS=Homo sapiens GN=HARS PE=4 SV=1 - [Q3KW3_HUMAN]                                        | 1.37827 | 1.44827 | 1.45027 | 1.47227 | 7.139 | 7.161 | 7.168 | 7.150 | 7.168 | 7.168 | -0.015 |
| A2A8K4                                                                                    | RD RNA binding protein OS=Homo sapiens GN=RDBP PE=4 SV=1 - [A2A8K4_HUMAN]                                        | 6.63526 | 2.26226 | 4.00126 | 4.16226 | 6.822 | 6.355 | 6.604 | 6.608 | 6.588 | 6.604 | -0.016 |
| US snRNP-associated Sm-like protein LSm3 OS=Homo sapiens GN=LSM3 PE=1 SV=1 - [LSM3_HUMAN] | 1.1.63526                                                                                                        | 1.79227 | 1.79227 | 1.67527 | 7.152   | 7.253 | 7.213 | 7.224 | 7.203 | 7.219 | 7.219 | -0.016 |
| P5C276                                                                                    | Uncharacterized protein OS=Homo sapiens GN=USO1 PE=1 SV=1 - [USO1_HUMAN]                                         | 6.16526 | 3.49627 | 4.89126 | 4.16226 | 6.842 | 6.782 | 6.830 | 6.842 | 6.842 | 6.842 | -0.016 |
| Q9WVC2                                                                                    | 40S ribosomal protein S21 OS=Homo sapiens GN=RPS21 PE=2 SV=1 - [Q9WVC2_HUMAN]                                    | 9.43827 | 8.09127 | 9.01127 | 9.15227 | 7.975 | 7.908 | 7.955 | 7.962 | 7.941 | 7.958 | -0.017 |
| P62277                                                                                    | 40S ribosomal protein S13 OS=Homo sapiens GN=RPS13 PE=1 SV=2 - [RPS13_HUMAN]                                     | 7.23827 | 6.11627 | 6.65127 | 7.27727 | 7.865 | 7.768 | 7.823 | 7.862 | 7.826 | 7.842 | -0.017 |
| Q75354-2                                                                                  | Isoform 2 of Cold shock domain-containing protein E1 OS=Homo sapiens GN=CSD1 - [CSD1_HUMAN]                      | 1.07727 | 5.43326 | 8.75026 | 7.24226 | 7.032 | 6.735 | 6.940 | 6.860 | 6.884 | 6.901 | -0.017 |
| P46537                                                                                    | Glossary synthase OS=Homo sapiens GN=GLS PE=1 SV=1 - [GLS_HUMAN]                                                 | 6.94726 | 6.94726 | 6.94726 | 6.94726 | 6.842 | 6.842 | 6.842 | 6.842 | 6.842 | 6.842 | -0.018 |
| D6R206                                                                                    | Uncharacterized protein OS=Homo sapiens GN=WDRL PE=1 SV=1 - [D6R206_HUMAN]                                       | 6.05926 | 6.05926 | 4.93326 | 8.13126 | 6.842 | 6.782 | 6.830 | 6.842 | 6.842 | 6.842 | -0.019 |
| P08779                                                                                    | Keratin, type I cytoskeletal 16 OS=Homo sapiens GN=KRT16 PE=1 SV=4 - [KIC16_HUMAN]                               | 6.87127 | 5.21527 | 6.73727 | 6.29327 | 7.837 | 7.717 | 7.797 | 7.799 | 7.777 | 7.798 | -0.021 |
| Q00211                                                                                    | ATP-dependent RNA helicase A OS=Homo sapiens GN=DHX9 PE=1 SV=4 - [DHX9_HUMAN]                                    | 1.94327 | 1.30027 | 1.41827 | 1.29427 | 7.288 | 7.115 | 7.152 | 7.295 | 7.202 | 7.223 | -0.022 |
| Q9H451-2                                                                                  | Isoform 2 of Serine/threonine-protein phosphatase PGAMS, mitochondrial OS=Homo sapiens GN=PGAMS - [P             | 5.54726 | 2.74926 | 2.75026 | 5.83226 | 6.559 | 6.439 | 6.441 | 6.968 | 6.744 | 6.766 | -0.022 |
| P05236                                                                                    | 60S ribosomal protein L23 OS=Homo sapiens GN=L23 PE=1 SV=1 - [RLA23_HUMAN]                                       | 3.61928 | 3.61928 | 3.61928 | 3.61928 | 8.744 | 8.439 | 8.441 | 8.622 | 8.499 | 8.521 | -0.022 |
| Q9H460-2                                                                                  | Isoform 2 of 26S proteasome non-ATPase regulatory subunit 1 OS=Homo sapiens GN=PSMD1 - [PSMD1_HUMAN]             | 4.96276 | 5.92626 | 5.85626 | 1.19027 | 6.087 | 6.981 | 6.933 | 7.075 | 7.098 | 7.098 | -0.022 |
| Q9HDC9-2                                                                                  | Isoform 2 of Adipocyte plasma membrane-associated protein OS=Homo sapiens GN=APMAP - [APMAP_HUM]                 | 1.42627 | 1.54227 | 1.18427 | 2.07327 | 7.154 | 7.188 | 7.073 | 7.317 | 7.171 | 7.195 | -0.024 |
| Q92598-2                                                                                  | Isoform 2 of Heat shock protein 105 kDa OS=Homo sapiens GN=HSPH1 - [HSPH1_HUMAN]                                 | 1.78027 | 2.39127 | 2.11927 | 2.25627 | 7.250 | 7.379 | 7.326 | 7.353 | 7.314 | 7.340 | -0.025 |
| G3V4F7                                                                                    | Uncharacterized protein OS=Homo sapiens GN=SRPF PE=4 SV=1 - [G3V4F7_HUMAN]                                       | 6.55326 | 6.03626 | 8.49326 | 7.89026 | 6.816 | 6.956 | 6.929 | 6.897 | 6.886 | 6.913 | -0.027 |
| P64243                                                                                    | Histone H3.3 OS=Homo sapiens GN=H3.3 PE=1 SV=1 - [H3.3_HUMAN]                                                    | 1.09327 | 1.09327 | 1.09327 | 1.09327 | 6.963 | 6.963 | 6.963 | 6.963 | 6.963 | 6.963 | -0.027 |
| FRW906                                                                                    | Uncharacterized protein OS=Homo sapiens GN=CTSD PE=3 SV=1 - [FRW906_HUMAN]                                       | 1.28827 | 1.69327 | 1.69327 | 1.74527 | 7.157 | 7.229 | 7.151 | 7.242 | 7.197 | 7.198 | -0     |

|          |                                                                                                                       |         |         |         |         |       |       |       |       |        |        |        |
|----------|-----------------------------------------------------------------------------------------------------------------------|---------|---------|---------|---------|-------|-------|-------|-------|--------|--------|--------|
| Q9NR30-2 | Isoform 2 of Nucleolar RNA helicase 2 OS=Homo sapiens GN=DDX21 - [DDX21_HUMAN]                                        | 1.567E7 | 1.381E7 | 2.060E7 | 1.953E7 | 7.195 | 7.140 | 7.314 | 7.291 | 7.168  | 7.302  | -0.135 |
| P28072   | Proteasome subunit beta type-6 OS=Homo sapiens GN=PSMB6 PE=1 SV=4 - [PSMB_HUMAN]                                      | 1.914E7 | 1.985E7 | 2.421E7 | 2.918E7 | 7.282 | 7.298 | 7.384 | 7.485 | 7.290  | 7.425  | -0.135 |
| F19494-3 | Isoform 3 of heterogeneous nuclear ribonucleoprotein H5 OS=Homo sapiens GN=HNRNP15 - [HNRNP15_HUMAN]                  | 2.207E7 | 1.649E7 | 2.558E7 | 2.656E7 | 7.344 | 7.217 | 7.408 | 7.424 | 7.261  | 7.416  | -0.136 |
| P22061   | Protein-L-isoaspartate (D-aspartate) O-methyltransferase OS=Homo sapiens GN=PCMT1 PE=1 SV=4 - [PMTL_HUMAN]            | 5.063E7 | 8.588E7 | 1.004E8 | 8.163E7 | 7.704 | 7.934 | 8.002 | 7.912 | 7.819  | 7.957  | -0.138 |
| E9PFD4   | Uncharacterized protein OS=Homo sapiens GN=BZV2 PE=4 SV=1 - [E9PFD4_HUMAN]                                            | 2.301E6 | 3.427E6 | 3.873E6 | 3.860E6 | 6.362 | 6.535 | 6.588 | 6.587 | 6.448  | 6.587  | -0.139 |
| P38159   | Heterogeneous nuclear ribonucleoprotein G OS=Homo sapiens GN=HNRPG PE=1 SV=3 - [HNRPG_HUMAN]                          | 3.030E7 | 2.019E7 | 3.432E7 | 3.382E7 | 7.481 | 7.305 | 7.536 | 7.529 | 7.393  | 7.532  | -0.139 |
| ABC264   | Extracellular signal-regulated kinase 2 splice variant OS=Homo sapiens GN=HRK1 PE=2 SV=1 - [ABC264_HUMAN]             | 1.320E7 | 1.499E7 | 2.301E7 | 1.999E7 | 7.120 | 7.161 | 7.382 | 7.120 | 7.262  | -0.141 | -0.141 |
| E9PFD2   | Uncharacterized protein OS=Homo sapiens GN=HTSF1 PE=4 SV=2 - [E9PFD2_HUMAN]                                           | 1.293E7 | 6.956E6 | 1.251E7 | 1.370E7 | 7.112 | 6.842 | 7.101 | 6.977 | 7.137  | 7.137  | -0.142 |
| Q13442   | 28 kDa heat- and acid-stable phosphoprotein OS=Homo sapiens GN=PDAP1 PE=1 SV=1 - [HAP28_HUMAN]                        |         | 5.828E6 | 8.355E6 | 7.852E6 |       | 6.766 | 6.922 | 6.885 | 6.766  | 6.908  | -0.143 |
| P23919   | Thymidylate kinase OS=Homo sapiens GN=DTYMK PE=1 SV=4 - [KTHY_HUMAN]                                                  |         | 4.015E6 | 5.260E6 | 5.987E6 |       | 6.604 | 6.721 | 6.777 | 6.604  | 6.749  | -0.145 |
| P40429   | 60S ribosomal protein L13a OS=Homo sapiens GN=RL13A PE=1 SV=2 - [RL13A_HUMAN]                                         | 7.175E7 | 4.387E7 | 8.294E7 | 7.427E7 | 7.856 | 7.642 | 7.919 | 7.871 | 7.749  | 7.895  | -0.146 |
| E5R054   | Uncharacterized protein OS=Homo sapiens GN=PFN1 PE=4 SV=1 - [E5R054_HUMAN]                                            |         | 6.497E6 | 8.830E6 | 9.478E6 |       | 6.812 | 6.946 | 6.977 | 6.812  | 6.961  | -0.149 |
| P05511-3 | Isoform 3 of heterogeneous nuclear ribonucleoprotein A1 OS=Homo sapiens GN=HNRNP1 - [RDA1_HUMAN]                      | 1.517E8 | 1.345E8 | 2.095E8 | 2.941E8 | 8.196 | 8.129 | 8.321 | 8.310 | 8.162  | 8.316  | -0.153 |
| E9P773   | dCTP pyrophosphatase 1 OS=Homo sapiens GN=DCTP1 PE=1 SV=1 - [DCTP1_HUMAN]                                             | 1.099E7 | 1.757E7 | 1.802E7 | 2.181E7 | 7.041 | 7.245 | 7.256 | 7.339 | 7.143  | 7.297  | -0.154 |
| Q98R12   | 39S ribosomal protein L45, mitochondrial OS=Homo sapiens GN=MRPL45 PE=1 SV=2 - [R45_HUMAN]                            |         | 7.732E6 | 9.578E6 | 1.301E7 |       | 6.888 | 6.981 | 7.114 | 6.888  | 7.048  | -0.160 |
| O43390   | Heterogeneous nuclear ribonucleoprotein R OS=Homo sapiens GN=HNRNP R PE=1 SV=1 - [HNRNP_R_HUMAN]                      | 3.683E7 | 2.521E7 | 4.391E7 | 4.421E7 | 7.566 | 7.402 | 7.643 | 7.646 | 7.484  | 7.644  | -0.160 |
| Q3V4W0   | Uncharacterized protein OS=Homo sapiens GN=HNRNP C PE=4 SV=1 - [Q3V4W0_HUMAN]                                         | 1.518E8 | 1.098E8 | 1.989E8 | 1.788E8 | 8.181 | 8.041 | 8.298 | 8.252 | 8.111  | 8.275  | -0.164 |
| Q15785   | Mitochondrial import receptor subunit TOM34 OS=Homo sapiens GN=TMOM34 PE=1 SV=2 - [TMOM34_HUMAN]                      | 1.186E7 | 1.499E6 | 6.409E6 | 6.124E6 | 7.074 | 6.175 | 6.807 | 6.787 | 6.625  | 6.797  | -0.172 |
| O94776   | Metastasis-associated protein 2 OS=Homo sapiens GN=MTA2 PE=1 SV=1 - [MTA2_HUMAN]                                      | 4.493E6 | 3.313E6 | 5.799E6 | 6.653   | 6.520 | 6.760 | 6.586 | 6.760 | 6.586  | 6.760  | -0.174 |
| P62373   | 40S ribosomal protein S29 OS=Homo sapiens GN=RPS29 PE=1 SV=2 - [R29_HUMAN]                                            | 3.572E7 | 2.403E7 | 5.183E7 | 3.712E7 | 7.553 | 7.381 | 7.715 | 7.570 | 7.467  | 7.642  | -0.175 |
| Q97593-2 | Isoform 2 of RNA-binding protein 8A OS=Homo sapiens GN=RBMA - [RBMA_HUMAN]                                            | 2.822E7 | 1.964E7 | 3.052E7 | 4.431E7 | 7.451 | 7.293 | 7.485 | 7.647 | 7.372  | 7.566  | -0.194 |
| Q00796   | Scorbutol dehydrogenase OS=Homo sapiens GN=SORD PE=1 SV=4 - [DHSD_HUMAN]                                              | 8.868E6 | 4.228E6 | 1.083E7 | 8.538E6 | 6.948 | 6.626 | 7.034 | 6.932 | 6.787  | 6.983  | -0.196 |
| Q14566   | DNA replication licensing factor MCM6 OS=Homo sapiens GN=MCM6 PE=1 SV=1 - [MCM6_HUMAN]                                |         | 7.285E6 | 1.193E7 | 1.537E7 |       | 7.004 | 6.862 | 7.077 | 7.187  | 6.933  | -0.198 |
| Q97256   | Coiled-coil domain-containing protein 72 OS=Homo sapiens GN=CCDC72 PE=1 SV=1 - [CCDC72_HUMAN]                         | 1.654E6 |         | 2.775E6 | 2.467E6 | 6.219 |       | 6.443 | 6.392 | 6.219  | 6.418  | -0.199 |
| Q8W424-6 | Isoform 6 of Titin OS=Homo sapiens GN=TTN - [TTIN_HUMAN]                                                              |         | 1.730E7 | 2.958E7 | 7.238   |       |       | 7.238 | 7.441 | 7.238  | 7.441  | -0.203 |
| P49006   | MARCKS-related protein OS=Homo sapiens GN=MARCKSL1 PE=1 SV=2 - [MRP_HUMAN]                                            | 6.066E6 | 5.676E6 | 7.730E6 | 1.180E7 | 6.783 | 6.754 | 6.888 | 7.072 | 6.768  | 6.980  | -0.211 |
| E5R201   | Uncharacterized protein OS=Homo sapiens GN=PGM1 PE=4 SV=1 - [E5R201_HUMAN]                                            |         | 1.378E7 | 2.259E7 | 1.378E7 |       | 7.139 | 7.354 | 7.372 | 7.139  | 7.354  | -0.215 |
| Q97237   | Peptidyl-prolyl cis-trans isomerase NIMA-interacting 4 OS=Homo sapiens GN=PIN4 PE=1 SV=1 - [PIN4_HUMAN]               | 1.148E7 | 6.748E7 | 4.622E7 | 7.060   | 7.829 | 7.665 | 7.449 | 7.669 | 7.445  | 7.667  | -0.222 |
| P22626   | Heterogeneous nuclear ribonucleoproteins A2/B1 OS=Homo sapiens GN=HNRNP A2B1 PE=1 SV=2 - [RDA2_HUMAN]                 | 2.561E8 | 2.096E8 | 3.858E8 | 3.877E8 | 8.408 | 8.321 | 8.586 | 8.589 | 8.365  | 8.587  | -0.223 |
| P62841   | 40S ribosomal protein S15 OS=Homo sapiens GN=RPS15 PE=1 SV=1 - [R15_HUMAN]                                            | 3.033E7 | 5.453E7 | 6.724E7 | 7.138E7 | 7.482 | 7.737 | 7.828 | 7.854 | 7.609  | 7.841  | -0.231 |
| O96019   | Actin-like protein 6A OS=Homo sapiens GN=ACTL6A PE=1 SV=1 - [ACTL6A_HUMAN]                                            | 3.652E6 | 9.089E6 | 9.936E6 | 6.563   | 6.959 | 6.997 | 6.971 | 6.997 | 6.781  | 6.997  | -0.237 |
| Q72H49-2 | Isoform 2 of HD domain-containing protein 2 OS=Homo sapiens GN=HDCC2 PE=1 SV=1 - [HDCC2_HUMAN]                        | 5.995E6 | 6.885E6 | 9.874E6 | 1.421E7 | 6.770 | 6.825 | 6.994 | 7.152 | 6.798  | 7.073  | -0.276 |
| P26496   | Mitochondrial ribosomal protein L27, isoform CRA_c OS=Homo sapiens GN=MRPL27 PE=4 SV=1 - [DGRANL27_HUMAN]             | 1.802E6 | 1.921E6 | 2.562E6 | 6.256   | 6.256 | 6.256 | 6.256 | 6.256 | 6.256  | 6.256  | -0.277 |
| E9PFD1   | Uncharacterized protein OS=Homo sapiens GN=NUP155 PE=4 SV=1 - [E9PFD1_HUMAN]                                          | 6.800E6 | 3.516E6 | 6.493E6 | 6.800E6 | 6.546 | 6.546 | 6.812 | 6.838 | 6.546  | 6.825  | -0.279 |
| Q3V5D9   | Uncharacterized protein OS=Homo sapiens GN=APEX1 PE=1 SV=1 - [G3V5D9_HUMAN]                                           | 1.802E6 | 6.386E6 | 1.503E7 | 1.051E7 | 6.834 | 6.804 | 7.177 | 7.022 | 6.819  | 7.099  | -0.280 |
| P63167   | Dynein light chain 1, cytoplasmic OS=Homo sapiens GN=DNLL1 PE=1 SV=1 - [DYL1_HUMAN]                                   | 3.916E6 | 3.294E6 | 8.145E6 | 6.152E6 | 6.593 | 6.518 | 6.911 | 6.789 | 6.555  | 6.850  | -0.295 |
| Q96H79   | Zinc finger CCH-type antiviral protein 2 OS=Homo sapiens GN=ZC3H1V1L PE=1 SV=2 - [ZCCH1V1L_HUMAN]                     | 1.590E6 |         | 4.975E6 | 1.031E7 | 6.130 |       | 6.697 | 7.013 | 7.026  | 6.697  | -0.307 |
| P62877   | E3 ubiquitin-protein ligase RBX1 OS=Homo sapiens GN=RBX1 PE=1 SV=1 - [RBX1_HUMAN]                                     | 1.802E6 | 6.909E6 | 1.802E6 | 7.345E6 | 6.034 | 6.839 | 7.012 | 6.834 | 6.837  | 6.866  | -0.323 |
| Q13409-6 | Isoform 6 of Cytoplasmic dynein 1 intermediate chain 2 OS=Homo sapiens GN=DYNC12 - [DC12_HUMAN]                       | 8.730E6 | 1.839E6 | 8.457E6 | 6.941   | 6.265 | 6.927 | 6.927 | 6.603 | 6.927  | -0.324 |        |
| P47914   | 60S ribosomal protein L29 OS=Homo sapiens GN=RL29 PE=1 SV=2 - [R29_HUMAN]                                             | 6.107E7 | 3.912E7 | 1.319E8 | 9.069E7 | 7.786 | 8.120 | 7.958 | 7.689 | 8.039  | -0.350 |        |
| Q7L2E3-3 | Isoform 3 of Putative ATP-dependent RNA helicase DHX30 OS=Homo sapiens GN=DHX30 - [DHX30_HUMAN]                       | 1.215E6 | 1.163E6 | 2.967E6 | 6.085   | 6.066 | 6.085 | 6.472 | 6.075 | 6.472  | -0.397 |        |
| Q00578   | Mitochondrial 2-oxoglutarate/malate carrier protein OS=Homo sapiens GN=SLC25A11 PE=1 SV=3 - [MCOM11_HUMAN]            | 1.256E7 | 9.137E6 | 2.835E7 | 7.099   | 6.961 | 7.453 | 7.454 | 7.030 | 7.453  | -0.423 |        |
| R8KWC9   | Uncharacterized protein OS=Homo sapiens GN=EM4 PE=4 SV=2 - [R8KWC9_HUMAN]                                             | 1.022E6 | 6.909E6 | 1.022E6 | 7.345E6 | 6.034 | 6.839 | 7.012 | 6.834 | 6.837  | 6.866  | -0.429 |
| D6R9P3   | Uncharacterized protein OS=Homo sapiens GN=HNRNP AB PE=4 SV=1 - [D6R9P3_HUMAN]                                        | 7.647E7 | 4.505E7 | 4.347E7 | 7.356E8 | 7.884 | 7.654 | 7.638 | 8.867 | 7.669  | 8.252  | -0.484 |
| A6M660   | Uncharacterized protein OS=Homo sapiens GN=CRY2 PE=1 SV=1 - [A6M660_HUMAN]                                            | 2.027E6 | 8.222E6 | 1.049E7 | 1.569E7 | 6.307 | 6.915 | 7.021 | 7.106 | 6.611  | 7.108  | -0.487 |
| P30049   | ATP synthase subunit delta, mitochondrial OS=Homo sapiens GN=ATP5D PE=1 SV=2 - [ATPD_HUMAN]                           | 6.386E6 | 5.704E6 | 1.840E7 | 1.984E7 | 6.805 | 6.756 | 7.265 | 7.297 | 6.781  | 7.281  | -0.500 |
| B4D1C4   | Uncharacterized protein OS=Homo sapiens GN=LASP1 PE=2 SV=1 - [B4D1C4_HUMAN]                                           | 9.086E5 | 4.414E6 | 2.059E6 | 5.958   | 6.645 | 6.645 | 6.314 | 5.958 | 6.479  | -0.521 |        |
| Q9KCD2-2 | Isoform 2 of Methylcrotonyl-CoA carboxylase beta chain, mitochondrial OS=Homo sapiens GN=MCCC2 - [MCCC2_HUMAN]        |         | 2.115E6 | 7.942E6 |         | 6.325 |       | 6.894 | 6.325 | 6.894  | -0.569 |        |
| C8K1M0   | Glutathione reductase delta8-9 alternative splicing variant OS=Homo sapiens GN=GR PE=2 SV=1 - [C8K1M0_HUMAN]          | 1.194E7 | 1.079E6 | 1.335E7 | 7.077   | 6.033 | 7.126 | 6.655 | 7.126 | -0.570 | -0.570 |        |
| Q00752   | Peptidyl-prolyl cis-trans isomerase D OS=Homo sapiens GN=PPID PE=1 SV=3 - [PPID_HUMAN]                                | 1.464E6 |         | 5.538E6 | 6.165   |       |       | 6.743 | 6.165 | 6.743  | -0.578 |        |
| P61081   | NECD8-conjugating enzyme Ubc12 OS=Homo sapiens GN=UBE2M PE=1 SV=1 - [UBC12_HUMAN]                                     | 2.871E6 | 2.349E6 | 1.148E7 | 8.771E6 | 6.458 | 6.371 | 7.060 | 6.943 | 6.414  | 7.002  | -0.584 |
| P23288   | NAD-dependent malic enzyme, mitochondrial OS=Homo sapiens GN=ME2 PE=1 SV=1 - [MCOM_HUMAN]                             | 2.140E6 |         | 8.794E6 | 6.330   | 6.330 | 6.944 | 6.944 | 6.330 | 6.944  | -0.617 |        |
| R8W855   | Uncharacterized protein OS=Homo sapiens GN=EM4 PE=4 SV=2 - [R8W855_HUMAN]                                             | 2.422E6 |         | 1.038E7 | 1.056E7 | 6.384 |       | 7.012 | 6.384 | 7.018  | -0.634 |        |
| P42765   | 3-ketoacyl-CoA thiolase, mitochondrial OS=Homo sapiens GN=ACA2A PE=1 SV=2 - [THIM_HUMAN]                              | 8.778E5 | 1.446E7 | 1.017E7 | 5.943   | 6.905 | 7.160 | 7.008 | 6.424 | 7.084  | -0.660 |        |
| Q9PDP3   | Exosome complex component RRP41 OS=Homo sapiens GN=EXOSC4 PE=1 SV=3 - [EXOSC4_HUMAN]                                  | 9.767E5 | 8.951E6 | 5.979E6 | 5.990   | 6.952 | 6.748 | 5.990 | 6.850 | 6.850  | -0.860 |        |
| Q98R16   | Dihydropyrimidinase-related protein 5 OS=Homo sapiens GN=DHPYS5 PE=1 SV=1 - [DHPYS5_HUMAN]                            |         |         | 9.063E5 |         |       |       | 5.957 | 3     | 5.957  | -2.957 |        |
| P50203   | Uncharacterized protein OS=Homo sapiens GN=DIABLO PE=4 SV=1 - [F50203_HUMAN]                                          |         |         | 1.437E6 |         |       |       | 6.158 | 3     | 6.158  | -3.158 |        |
| Q9K6E7   | Pentatricopeptide repeat-containing protein 3, mitochondrial OS=Homo sapiens GN=PTCD3 PE=1 SV=3 - [PTCD3_HUMAN]       |         | 1.106E6 | 4.073E6 |         |       | 6.044 |       | 6.010 | 3      | 6.327  | -3.327 |
| P49756   | RNA-binding protein 25 OS=Homo sapiens GN=RBM25 PE=1 SV=3 - [RBM25_HUMAN]                                             |         |         | 2.279E6 |         |       |       | 6.358 | 3     | 6.358  | -3.358 |        |
| B4DSY9   | Uncharacterized protein OS=Homo sapiens GN=PRPF3 PE=2 SV=1 - [B4DSY9_HUMAN]                                           |         | 2.399E6 |         |         |       | 6.380 |       | 3     | 6.380  | -3.380 |        |
| P55265-5 | Isoform 5 of Double-stranded RNA-specific adenosine deaminase OS=Homo sapiens GN=ADAR - [DSRAD_HUMAN]                 |         | 9.380E6 | 7.252E5 |         |       | 6.972 | 5.860 | 3     | 6.416  | -3.416 |        |
| Q96L3    | 39S ribosomal protein L53, mitochondrial OS=Homo sapiens GN=MRPL53 PE=1 SV=1 - [R53_HUMAN]                            |         | 3.231E6 | 2.945E6 |         |       | 6.509 | 6.469 | 3     | 6.469  | -3.469 |        |
| P50X11   | Uncharacterized protein OS=Homo sapiens GN=CDG PE=4 SV=1 - [F50X11_HUMAN]                                             |         |         | 1.915E6 |         |       |       | 6.505 | 3     | 6.505  | -3.505 |        |
| E9P8T8   | Uncharacterized protein OS=Homo sapiens GN=SUMF2 PE=4 SV=1 - [E9P8T8_HUMAN]                                           |         | 3.287E6 | 4.666E6 |         |       | 6.517 | 6.669 | 3     | 6.593  | -3.593 |        |
| O75348   | V-type proton ATPase subunit G 1 OS=Homo sapiens GN=ATP6V1G1 PE=1 SV=3 - [VATG1_HUMAN]                                |         | 6.381E6 | 2.491E6 |         |       | 6.803 | 6.396 | 3     | 6.803  | -3.603 |        |
| P55957   | BH3-interacting domain death agonist OS=Homo sapiens GN=BIID PE=1 SV=1 - [BIID_HUMAN]                                 |         | 8.930E6 | 2.154E6 |         |       | 6.951 | 6.333 | 3     | 6.642  | -3.642 |        |
| Q15006   | Tetratricopeptide repeat protein 35 OS=Homo sapiens GN=TRC35 PE=1 SV=1 - [TRC35_HUMAN]                                |         | 6.192E6 | 3.854E6 |         |       | 6.792 | 6.586 | 3     | 6.669  | -3.669 |        |
| E5R8H0   | Uncharacterized protein OS=Homo sapiens GN=HARP1 PE=4 SV=1 - [E5R8H0_HUMAN]                                           |         |         | 4.903E6 |         |       | 6.890 | 6.890 | 3     | 6.890  | -3.890 |        |
| A6M4A2   | Ubiquitin carboxyl-terminal hydrolase OS=Homo sapiens GN=USP14 PE=3 SV=1 - [A6M4A2_HUMAN]                             |         | 3.656E6 | 7.134E6 |         |       | 6.563 | 6.853 | 3     | 6.708  | -3.708 |        |
| E5RFP0   | Uncharacterized protein OS=Homo sapiens GN=NUDC2 PE=4 SV=1 - [E5RFP0_HUMAN]                                           |         | 6.891E6 | 5.752E6 |         |       | 6.939 | 6.760 | 3     | 6.849  | -3.849 |        |
| A6M1C4   | Uncharacterized protein OS=Homo sapiens GN=ATXN10 PE=2 SV=4 - [A6M1C4_HUMAN]                                          |         | 9.533E6 | 5.399E6 |         |       | 6.979 | 6.732 | 3     | 6.856  | -3.856 |        |
| Q974W6   | ATG3-like protein 2 OS=Homo sapiens GN=ATG3L2 PE=1 SV=2 - [ATG3L2_HUMAN]                                              |         | 8.272E6 | 7.291E6 |         |       | 6.863 | 6.863 | 3     | 6.863  | -3.863 |        |
| B7Z5P0   | Nucleotide binding protein 2 (MnD homolog, E. coli), isoform CRA_d OS=Homo sapiens GN=NBP2 PE=2 SV=1 - [B7Z5P0_HUMAN] |         | 8.827E6 | 7.129E6 |         |       | 6.946 | 6.853 | 3     | 6.899  | -3.899 |        |
| Q9P961   | Endophilin-A2 OS=Homo sapiens GN=SH3GL1 PE=1 SV=1 - [SH3G1_HUMAN]                                                     |         | 6.103E6 | 1.038E7 |         |       | 6.786 | 7.016 | 3     | 6.901  | -3.901 |        |
| P46976-3 | Isoform GN-15 of Glycogenin-1 OS=Homo sapiens GN=GYGI - [GLYG_HUMAN]                                                  |         | 6.495E6 | 1.005E7 |         |       | 6.813 | 7.002 | 3     | 6.907  | -3.907 |        |
| Q9UJ12   | ATPase inhibitor, mitochondrial OS=Homo sapiens GN=ATPIF1 PE=1 SV=1 - [ATPIF1_HUMAN]                                  |         | 8.615E6 |         |         |       | 6.935 | 3     | 6.935 | -3.935 |        |        |
| Q96H24-3 | Isoform 3 of Ran-binding protein 3 OS=Homo sapiens GN=RBND3 - [RBND3_HUMAN]                                           |         | 7.852E6 | 9.550E6 |         |       | 6.895 | 6.980 | 3     | 6.837  | -3.937 |        |
| P50QW2   | Uncharacterized protein OS=Homo sapiens GN=TF15 PE=4 SV=1 - [F50QW2_HUMAN]                                            |         |         | 8.944E6 |         |       | 6.952 | 6.952 | 3     | 6.852  | -3.852 |        |
| E7EV06   | Uncharacterized protein OS=Homo sapiens GN=SLC3A3R1 PE=4 SV=1 - [E7EV06_HUMAN]                                        |         | 8.828E6 |         |         |       | 6.992 | 3     | 6.992 | -3.992 |        |        |
| Q1KMD3   | Heterogeneous nuclear ribonucleoprotein U-like protein 2 OS=Homo sapiens GN=HNRNPUL2 PE=1 SV=1 - [HNRNPUL2_HUMAN]     |         | 1.231E7 |         |         |       |       |       |       |        |        |        |

Extended Table 2

Histones, histone modifying proteins

| Accession | Description                                                                                            | Identified Previously | Ratio H/C |
|-----------|--------------------------------------------------------------------------------------------------------|-----------------------|-----------|
| P62805    | Histone H4 OS=Homo sapiens GN=HIST1H4A PE=1 SV=2 - [H4_HUMAN]                                          |                       | 0.370     |
| P04908    | Histone H2A type 1-B/E OS=Homo sapiens GN=HIST1H2AB PE=1 SV=2 - [H2A1B_HUMAN]                          |                       | 0.257     |
| Q16777    | Histone H2A type 2-C OS=Homo sapiens GN=HIST2H2AC PE=1 SV=4 - [H2A2C_HUMAN]                            |                       | 0.194     |
| O60814    | Histone H2B type 1-K OS=Homo sapiens GN=HIST1H2BK PE=1 SV=3 - [H2B1K_HUMAN]                            |                       | 0.174     |
| O14929-2  | Isoform B of Histone acetyltransferase type B catalytic subunit OS=Homo sapiens GN=HAT1 - [HAT1_HUMAN] |                       | 0.168     |
| Q09028-3  | Isoform 3 of Histone-binding protein RBBP4 OS=Homo sapiens GN=RBBP4 - [RBBP4_HUMAN]                    |                       | 0.143     |
| Q86X55-2  | Isoform 2 of Histone-arginine methyltransferase CARM1 OS=Homo sapiens GN=CARM1 - [CARM1_HUMAN]         |                       | 0.120     |
| Q92522    | Histone H1x OS=Homo sapiens GN=H1FX PE=1 SV=1 - [H1X_HUMAN]                                            |                       | 0.117     |
| P16403    | Histone H1.2 OS=Homo sapiens GN=HIST1H1C PE=1 SV=2 - [H12_HUMAN]                                       |                       | 0.098     |
| P10412    | Histone H1.4 OS=Homo sapiens GN=HIST1H1E PE=1 SV=2 - [H14_HUMAN]                                       |                       | 0.082     |
| P84243    | Histone H3.3 OS=Homo sapiens GN=H3F3A PE=1 SV=2 - [H33_HUMAN]                                          |                       | -0.027    |

ADP and ADP-ribose metabolism

| Accession | Description                                                                                                           | Identified Previously | Ratio H/C |
|-----------|-----------------------------------------------------------------------------------------------------------------------|-----------------------|-----------|
| O75874    | Iso citrate dehydrogenase [NADP] cytoplasmic OS=Homo sapiens GN=IDH1 PE=1 SV=2 - [IDHC_HUMAN]                         |                       | 0.333     |
| P53597    | Succinyl-CoA ligase [ADP/GDP-forming] subunit alpha, mitochondrial OS=Homo sapiens GN=SUCLG1 PE=1 SV=4 - [SUCA_HUMAN] |                       | 0.315     |
| P30043    | Flavin reductase (NADPH) OS=Homo sapiens GN=BLVRB PE=1 SV=3 - [BLVRB_HUMAN]                                           |                       | 0.313     |
| P09874    | Poly [ADP-ribose] polymerase 1 OS=Homo sapiens GN=PARP1 PE=1 SV=4 - [PARP1_HUMAN]                                     |                       | 0.280     |
| P61204    | ADP-ribosylation factor 3 OS=Homo sapiens GN=ARF3 PE=1 SV=2 - [ARF3_HUMAN]                                            |                       | 0.220     |
| P16152    | Carbonyl reductase [NADPH] 1 OS=Homo sapiens GN=CBR1 PE=1 SV=3 - [CBR1_HUMAN]                                         |                       | 0.197     |
| P05141    | ADP/ATP translocase 2 OS=Homo sapiens GN=SLC25A5 PE=1 SV=7 - [ADT2_HUMAN]                                             |                       | 0.156     |
| P12236    | ADP/ATP translocase 3 OS=Homo sapiens GN=SLC25A6 PE=1 SV=4 - [ADT3_HUMAN]                                             |                       | 0.126     |
| Q9UJY4    | ADP-ribosylation factor-binding protein GGA2 OS=Homo sapiens GN=GGA2 PE=1 SV=3 - [GGA2_HUMAN]                         |                       | 0.073     |
| Q4DFL2    | Iso citrate dehydrogenase [NADP] OS=Homo sapiens GN=IDH2 PE=2 SV=1 - [B4DFL2_HUMAN]                                   |                       | 0.012     |
| P11908    | Ribose-phosphate pyrophosphokinase 2 OS=Homo sapiens GN=PRPS2 PE=1 SV=2 - [PRPS2_HUMAN]                               |                       | 0.157     |
| P60891    | Ribose-phosphate pyrophosphokinase 1 OS=Homo sapiens GN=PRPS1 PE=1 SV=2 - [PRPS1_HUMAN]                               |                       | 0.091     |
| Q9UKK9    | ADP-sugar pyrophosphatase OS=Homo sapiens GN=NUDT5 PE=1 SV=1 - [NUDT5_HUMAN]                                          |                       | 0.366     |

ATP synthesis, metabolism

| Accession | Description                                                                                                                     | Identified Previously | Ratio H/C |
|-----------|---------------------------------------------------------------------------------------------------------------------------------|-----------------------|-----------|
| P56385    | ATP synthase subunit e, mitochondrial OS=Homo sapiens GN=ATP5I PE=1 SV=2 - [ATP5I_HUMAN]                                        |                       | 4.326     |
| ABMUN4    | Uncharacterized protein OS=Homo sapiens GN=ATP6V1E1 PE=2 SV=1 - [ABMUN4_HUMAN]                                                  |                       | 0.470     |
| P21281    | V-type proton ATPase subunit B, brain isoform OS=Homo sapiens GN=ATP6V1B2 PE=1 SV=3 - [VATB2_HUMAN]                             |                       | 0.386     |
| Q9NVI7-2  | Isoform 2 of ATPase family AAA domain-containing protein 3A OS=Homo sapiens GN=ATAD3A - [ATD3A_HUMAN]                           |                       | 0.283     |
| P55072    | Transitional endoplasmic reticulum ATPase OS=Homo sapiens GN=VCP PE=1 SV=4 - [TERA_HUMAN]                                       |                       | 0.218     |
| P55036    | 26S proteasome non-ATPase regulatory subunit 4 OS=Homo sapiens GN=PSMD4 PE=1 SV=1 - [PSMD4_HUMAN]                               |                       | 0.214     |
| O95433    | Activator of 90 kDa heat shock protein ATPase homolog 1 OS=Homo sapiens GN=AHS1 PE=1 SV=1 - [AHS1_HUMAN]                        |                       | 0.203     |
| B1AJY5    | Proteasome (Prosome, macropain) 26S subunit, non-ATPase, 10 OS=Homo sapiens GN=PSMD10 PE=4 SV=1 - [B1AJY5_HUMAN]                |                       | 0.189     |
| O00487    | 26S proteasome non-ATPase regulatory subunit 14 OS=Homo sapiens GN=PSMD14 PE=1 SV=1 - [PSDE_HUMAN]                              |                       | 0.188     |
| B7Z3U6    | ATPase, Na+/K+ transporting, alpha 1 polypeptide, isoform CRA_a OS=Homo sapiens GN=ATP1A1 PE=2 SV=1 - [B7Z3U6_HUMAN]            |                       | 0.179     |
| P36542    | ATP synthase subunit gamma, mitochondrial OS=Homo sapiens GN=ATP5C1 PE=1 SV=1 - [ATPG_HUMAN]                                    |                       | 0.172     |
| P06576    | ATP synthase subunit beta, mitochondrial OS=Homo sapiens GN=ATP5B PE=1 SV=3 - [ATPB_HUMAN]                                      |                       | 0.171     |
| P25705    | ATP synthase subunit alpha, mitochondrial OS=Homo sapiens GN=ATP5A1 PE=1 SV=1 - [ATPA_HUMAN]                                    |                       | 0.170     |
| Q15008    | 26S proteasome non-ATPase regulatory subunit 6 OS=Homo sapiens GN=PSMD6 PE=1 SV=1 - [PSMD6_HUMAN]                               |                       | 0.170     |
| C9J8H9    | Uncharacterized protein OS=Homo sapiens GN=ATP5J2 PE=4 SV=1 - [C9J8H9_HUMAN]                                                    |                       | 0.162     |
| Q13200    | 26S proteasome non-ATPase regulatory subunit 2 OS=Homo sapiens GN=PSMD2 PE=1 SV=3 - [PSMD2_HUMAN]                               |                       | 0.161     |
| O75947-2  | Isoform 2 of ATP synthase subunit d, mitochondrial OS=Homo sapiens GN=ATP5H - [ATPSH_HUMAN]                                     |                       | 0.158     |
| P05141    | ADP/ATP translocase 2 OS=Homo sapiens GN=SLC25A5 PE=1 SV=7 - [ADT2_HUMAN]                                                       |                       | 0.156     |
| P26196    | Probable ATP-dependent RNA helicase DDX6 OS=Homo sapiens GN=DDX6 PE=1 SV=2 - [DDX6_HUMAN]                                       |                       | 0.152     |
| P24539    | ATP synthase subunit b, mitochondrial OS=Homo sapiens GN=ATP5F1 PE=1 SV=2 - [AT5F1_HUMAN]                                       |                       | 0.149     |
| B7Z1R5    | Uncharacterized protein OS=Homo sapiens GN=ATP6V1A PE=2 SV=1 - [B7Z1R5_HUMAN]                                                   |                       | 0.145     |
| O00232    | 26S proteasome non-ATPase regulatory subunit 12 OS=Homo sapiens GN=PSMD12 PE=1 SV=3 - [PSD12_HUMAN]                             |                       | 0.140     |
| P48047    | ATP synthase subunit O, mitochondrial OS=Homo sapiens GN=ATP5O PE=1 SV=1 - [ATPO_HUMAN]                                         |                       | 0.139     |
| P12236    | ADP/ATP translocase 3 OS=Homo sapiens GN=SLC25A6 PE=1 SV=4 - [ADT3_HUMAN]                                                       |                       | 0.126     |
| P51665    | 26S proteasome non-ATPase regulatory subunit 7 OS=Homo sapiens GN=PSMD7 PE=1 SV=2 - [PSD7_HUMAN]                                |                       | 0.111     |
| C9JA36    | Uncharacterized protein OS=Homo sapiens GN=ATP1B3 PE=3 SV=1 - [C9JA36_HUMAN]                                                    |                       | 0.110     |
| O00231    | 26S proteasome non-ATPase regulatory subunit 11 OS=Homo sapiens GN=PSMD11 PE=1 SV=3 - [PSD11_HUMAN]                             |                       | 0.110     |
| Q9NTK5    | Obg-like ATPase 1 OS=Homo sapiens GN=OLA1 PE=1 SV=2 - [OLA1_HUMAN]                                                              |                       | 0.103     |
| Q92499    | ATP-dependent RNA helicase DDX1 OS=Homo sapiens GN=DDX1 PE=1 SV=2 - [DDX1_HUMAN]                                                |                       | 0.103     |
| P17844    | Probable ATP-dependent RNA helicase DDX5 OS=Homo sapiens GN=DDX5 PE=1 SV=1 - [DDX5_HUMAN]                                       |                       | 0.087     |
| E9PN17    | Uncharacterized protein OS=Homo sapiens GN=ATP5L PE=4 SV=1 - [E9PN17_HUMAN]                                                     |                       | 0.082     |
| B4DJ66    | Proteasome (Prosome, macropain) 26S subunit, non-ATPase, 13, isoform CRA_d OS=Homo sapiens GN=PSMD13 PE=2 SV=1 - [B4DJ66_HUMAN] |                       | 0.060     |
| P53396    | ATP-citrate synthase OS=Homo sapiens GN=ACLY PE=1 SV=3 - [ACLY_HUMAN]                                                           |                       | 0.057     |
| Q92841-4  | Isoform 4 of Probable ATP-dependent RNA helicase DDX17 OS=Homo sapiens GN=DDX17 - [DDX17_HUMAN]                                 |                       | 0.056     |
| Q7L014    | Probable ATP-dependent RNA helicase DDX46 OS=Homo sapiens GN=DDX46 PE=1 SV=2 - [DDX46_HUMAN]                                    |                       | 0.040     |
| Q9NUU7    | ATP-dependent RNA helicase DDX19A OS=Homo sapiens GN=DDX19A PE=1 SV=1 - [DD19A_HUMAN]                                           |                       | 0.019     |
| O00571    | ATP-dependent RNA helicase DDX3X OS=Homo sapiens GN=DDX3X PE=1 SV=3 - [DDX3X_HUMAN]                                             |                       | 0.008     |
| Q08211    | ATP-dependent RNA helicase A OS=Homo sapiens GN=DHX9 PE=1 SV=4 - [DHX9_HUMAN]                                                   |                       | -0.022    |
| Q99460-2  | Isoform 2 of 26S proteasome non-ATPase regulatory subunit 1 OS=Homo sapiens GN=PSMD1 - [PSMD1_HUMAN]                            |                       | -0.023    |
| P61221    | ATP-binding cassette sub-family E member 1 OS=Homo sapiens GN=ABCE1 PE=1 SV=1 - [ABCE1_HUMAN]                                   |                       | -0.055    |
| P18859    | ATP synthase-coupling factor 6, mitochondrial OS=Homo sapiens GN=ATP5J PE=1 SV=1 - [ATP5J_HUMAN]                                |                       | -0.059    |
| Q7L2E3-3  | Isoform 3 of Putative ATP-dependent RNA helicase DHX30 OS=Homo sapiens GN=DHX30 - [DHX30_HUMAN]                                 |                       | -0.397    |
| P30049    | ATP synthase subunit delta, mitochondrial OS=Homo sapiens GN=ATP5D PE=1 SV=2 - [ATPD_HUMAN]                                     |                       | -0.500    |
| O75348    | V-type proton ATPase subunit G 1 OS=Homo sapiens GN=ATP6V1G1 PE=1 SV=3 - [VATG1_HUMAN]                                          |                       | -3.600    |
| Q9UII2    | ATPase inhibitor, mitochondrial OS=Homo sapiens GN=ATPIF1 PE=1 SV=1 - [ATIF1_HUMAN]                                             |                       | -3.935    |

NAD metabolism

| Accession | Description                                                                                                                       | Ratio H/C |
|-----------|-----------------------------------------------------------------------------------------------------------------------------------|-----------|
| Q95182    | NADH dehydrogenase [ubiquinone] 1 alpha subcomplex subunit 7 OS=Homo sapiens GN=NDUFA7 PE=1 SV=3 - [NDUA7_HUMAN]                  | 3.672     |
| Q9P0J0    | NADH dehydrogenase [ubiquinone] 1 alpha subcomplex subunit 13 OS=Homo sapiens GN=NDUFA13 PE=1 SV=3 - [NDUAD_HUMAN]                | 0.784     |
| O75874    | Isocitrate dehydrogenase [NADP] cytoplasmic OS=Homo sapiens GN=IDH1 PE=1 SV=2 - [IDHC_HUMAN]                                      | 0.333     |
| P30043    | Flavin reductase (NADPH) OS=Homo sapiens GN=BLVRB PE=1 SV=3 - [BLVRB_HUMAN]                                                       | 0.313     |
| P16152    | Carbonyl reductase [NADPH] 1 OS=Homo sapiens GN=CBR1 PE=1 SV=3 - [CBR1_HUMAN]                                                     | 0.197     |
| Q9BU61    | NADH dehydrogenase [ubiquinone] 1 alpha subcomplex assembly factor 3 OS=Homo sapiens GN=NDUFAF3 PE=1 SV=1 - [NDUF3_HUMAN]         | 0.142     |
| P50213    | Isocitrate dehydrogenase [NAD] subunit alpha, mitochondrial OS=Homo sapiens GN=IDH3A PE=1 SV=1 - [IDH3A_HUMAN]                    | 0.098     |
| P00387-2  | Isoform 2 of NADH-cytochrome b5 reductase 3 OS=Homo sapiens GN=CYB5R3 - [NB5R3_HUMAN]                                             | 0.078     |
| B4DFL2    | Isocitrate dehydrogenase [NADP] OS=Homo sapiens GN=IDH2 PE=2 SV=1 - [B4DFL2_HUMAN]                                                | 0.012     |
| Q96II6    | NADH dehydrogenase (Ubiquinone) 1 beta subcomplex, 10, 22kDa, isoform CRA_a OS=Homo sapiens GN=NDUFB10 PE=2 SV=1 - [Q96II6_HUMAN] | -0.053    |
| P23368    | NAD-dependent malic enzyme, mitochondrial OS=Homo sapiens GN=ME2 PE=1 SV=1 - [MAOM_HUMAN]                                         | -0.614    |

Kinases, Kinase regulatory proteins

| Accession | Description                                                                                                               | Ratio H/C |
|-----------|---------------------------------------------------------------------------------------------------------------------------|-----------|
| Q9UNF0-2  | Isoform 2 of Protein kinase C and casein kinase substrate in neurons protein 2 OS=Homo sapiens GN=PACIN2 - [PACIN2_HUMAN] | 0.834     |
| P36507    | Dual specificity mitogen-activated protein kinase kinase 2 OS=Homo sapiens GN=MAP2K2 PE=1 SV=1 - [MP2K2_HUMAN]            | 0.346     |
| P22392-2  | Isoform 3 of Nucleoside diphosphate kinase B OS=Homo sapiens GN=NME2 - [NDKB_HUMAN]                                       | 0.297     |
| Q9H1E3    | Nuclear ubiquitous casein and cyclin-dependent kinases substrate OS=Homo sapiens GN=NUCKS1 PE=1 SV=1 - [NUCKS_HUMAN]      | 0.285     |
| P00558    | Phosphoglycerate kinase 1 OS=Homo sapiens GN=PGK1 PE=1 SV=3 - [PGK1_HUMAN]                                                | 0.262     |
| P61024    | Cyclin-dependent kinases regulatory subunit 1 OS=Homo sapiens GN=CKS1B PE=1 SV=1 - [CKS1_HUMAN]                           | 0.238     |
| Q9BZK2    | Uridine-cytidine kinase 2 OS=Homo sapiens GN=UCK2 PE=1 SV=1 - [UCK2_HUMAN]                                                | 0.220     |
| Q16822    | Phosphoenolpyruvate carboxykinase [GTP], mitochondrial OS=Homo sapiens GN=PCK2 PE=1 SV=3 - [PCKGM_HUMAN]                  | 0.204     |
| P06493    | Cyclin-dependent kinase 1 OS=Homo sapiens GN=CDK1 PE=1 SV=3 - [CDK1_HUMAN]                                                | 0.175     |
| P00568    | Adenylate kinase isoenzyme 1 OS=Homo sapiens GN=AK1 PE=1 SV=3 - [KAD1_HUMAN]                                              | 0.174     |
| P11908    | Ribose-phosphate pyrophosphokinase 2 OS=Homo sapiens GN=PRPS2 PE=1 SV=2 - [PRPS2_HUMAN]                                   | 0.157     |
| Q9H0C8    | Integrin-linked kinase-associated serine/threonine phosphatase 2C OS=Homo sapiens GN=ILKAP PE=1 SV=1 - [ILKAP_HUMAN]      | 0.144     |
| P42771    | Cyclin-dependent kinase inhibitor 2A, isoforms 1/2/3 OS=Homo sapiens GN=CDKN2A PE=1 SV=2 - [CD2A1_HUMAN]                  | 0.137     |
| P12532    | Creatine kinase U-type, mitochondrial OS=Homo sapiens GN=CKMT1A PE=1 SV=1 - [KCRU_HUMAN]                                  | 0.122     |
| Q9Y3F4    | Serine-threonine kinase receptor-associated protein OS=Homo sapiens GN=STRAP PE=1 SV=1 - [STRAP_HUMAN]                    | 0.117     |
| P78527    | DNA-dependent protein kinase catalytic subunit OS=Homo sapiens GN=PRKDC PE=1 SV=3 - [PRKDC_HUMAN]                         | 0.111     |
| P60891    | Ribose-phosphate pyrophosphokinase 1 OS=Homo sapiens GN=PRPS1 PE=1 SV=2 - [PRPS1_HUMAN]                                   | 0.091     |
| P12277    | Creatine kinase B-type OS=Homo sapiens GN=CKB PE=1 SV=1 - [KCRB_HUMAN]                                                    | 0.087     |
| P14618    | Pyruvate kinase isozymes M1/M2 OS=Homo sapiens GN=PKM2 PE=1 SV=4 - [KPYM_HUMAN]                                           | 0.076     |
| P67870    | Casein kinase II subunit beta OS=Homo sapiens GN=CSNK2B PE=1 SV=1 - [CSK2B_HUMAN]                                         | -0.001    |
| O60271-7  | Isoform 7 of C-Jun-amino-terminal kinase-interacting protein 4 OS=Homo sapiens GN=SPAG9 - [JIP4_HUMAN]                    | -0.003    |
| A8CZ64    | Extracellular signal-regulated kinase-2 splice variant OS=Homo sapiens GN=MAPK1 PE=2 SV=1 - [A8CZ64_HUMAN]                | -0.141    |
| P23919    | Thymidylate kinase OS=Homo sapiens GN=DTYMK PE=1 SV=4 - [KTHY_HUMAN]                                                      | -0.145    |

Phosphatases

| Accession | Description                                                                                                                | Ratio H/C |
|-----------|----------------------------------------------------------------------------------------------------------------------------|-----------|
| P62140    | Serine/threonine-protein phosphatase PP1-beta catalytic subunit OS=Homo sapiens GN=PPP1CB PE=1 SV=3 - [PP1B_HUMAN]         | 0.244     |
| Q9BSD7    | Cancer-related nucleoside-triphosphatase OS=Homo sapiens GN=NTPCR PE=1 SV=1 - [NTPCR_HUMAN]                                | 0.218     |
| P24666    | Low molecular weight phosphotyrosine protein phosphatase OS=Homo sapiens GN=ACP1 PE=1 SV=3 - [PPAC_HUMAN]                  | 0.204     |
| F8VYE8    | Serine/threonine-protein phosphatase OS=Homo sapiens GN=PPP1CC PE=3 SV=1 - [F8VYE8_HUMAN]                                  | 0.197     |
| Q9NRX4    | 14 kDa phosphohistidine phosphatase OS=Homo sapiens GN=PHPT1 PE=1 SV=1 - [PHP14_HUMAN]                                     | 0.147     |
| Q9H0C8    | Integrin-linked kinase-associated serine/threonine phosphatase 2C OS=Homo sapiens GN=ILKAP PE=1 SV=1 - [ILKAP_HUMAN]       | 0.144     |
| Q15181    | Inorganic pyrophosphatase OS=Homo sapiens GN=PPA1 PE=1 SV=2 - [IPYR_HUMAN]                                                 | 0.143     |
| Q9H2U2-3  | Isoform 3 of Inorganic pyrophosphatase 2, mitochondrial OS=Homo sapiens GN=PPA2 - [IPYR2_HUMAN]                            | 0.140     |
| P62714    | Serine/threonine-protein phosphatase 2A catalytic subunit beta isoform OS=Homo sapiens GN=PPP2CB PE=1 SV=1 - [PP2AB_HUMAN] | 0.138     |
| Q96C90    | Protein phosphatase 1 regulatory subunit 14B OS=Homo sapiens GN=PPP1R14B PE=1 SV=3 - [PP14B_HUMAN]                         | 0.127     |
| P53041    | Serine/threonine-protein phosphatase 5 OS=Homo sapiens GN=PPP5C PE=1 SV=1 - [PPP5_HUMAN]                                   | 0.068     |
| E9PMD7    | Serine/threonine-protein phosphatase OS=Homo sapiens GN=PPP1CA PE=3 SV=1 - [E9PMD7_HUMAN]                                  | 0.058     |
| O15355    | Protein phosphatase 1G OS=Homo sapiens GN=PPM1G PE=1 SV=1 - [PPM1G_HUMAN]                                                  | 0.052     |
| Q96HS1-2  | Isoform 2 of Serine/threonine-protein phosphatase PGAM5, mitochondrial OS=Homo sapiens GN=PGAM5 - [PGAM5_HUMAN]            | -0.022    |
| Q9H773    | dCTP pyrophosphatase 1 OS=Homo sapiens GN=DCTPP1 PE=1 SV=1 - [DCTP1_HUMAN]                                                 | -0.154    |

Extended Table 3: PAR-Mass Spec GO Biological Process enrichment Control (T0) Proteins

| Control Proteins GO Biological Process Enrichment | # Genes in Gene Set (K) | # Genes in Overlap (k) | k/K    | p-value  | FDR q-value |
|---------------------------------------------------|-------------------------|------------------------|--------|----------|-------------|
| ORGANELLE_ORGANIZATION_AND_BIOGENESIS             | 473                     | 8                      | 0.0169 | 3.12E-06 | 2.58E-03    |
| ONE_CARBON_COMPOUND_METABOLIC_PROCESS             | 26                      | 3                      | 0.1154 | 1.59E-05 | 6.58E-03    |
| MITOCHONDRION_ORGANIZATION_AND_BIOGENESIS         | 48                      | 3                      | 0.0625 | 1.03E-04 | 2.83E-02    |
| PROTEIN_TARGETING_TO_MITOCHONDRION                | 11                      | 2                      | 0.1818 | 1.88E-04 | 3.88E-02    |

Extended Table 4: PAR-Mass Spec GO Biological Process enrichment Hormone (T30) Proteins

| Control Proteins GO Biological Process Enrichment                               | # Genes in Gene Set | # Genes in Overlap | k/K    | p-value  | FDR q-value |
|---------------------------------------------------------------------------------|---------------------|--------------------|--------|----------|-------------|
| ESTABLISHMENT_OF_LOCALIZATION                                                   | 870                 | 50                 | 0.0575 | 0.00E+00 | 0.00E+00    |
| TRANSPORT                                                                       | 795                 | 46                 | 0.0579 | 0.00E+00 | 0.00E+00    |
| BIOPOLYMER_METABOLIC_PROCESS                                                    | 1684                | 104                | 0.0618 | 0.00E+00 | 0.00E+00    |
| CELLULAR_PROTEIN_METABOLIC_PROCESS                                              | 1117                | 79                 | 0.0707 | 0.00E+00 | 0.00E+00    |
| CELLULAR_MACROMOLECULE_METABOLIC_PROCESS                                        | 1131                | 80                 | 0.0707 | 0.00E+00 | 0.00E+00    |
| RNA_METABOLIC_PROCESS                                                           | 841                 | 60                 | 0.0713 | 0.00E+00 | 0.00E+00    |
| PROTEIN_METABOLIC_PROCESS                                                       | 1231                | 90                 | 0.0731 | 0.00E+00 | 0.00E+00    |
| NUCLEOBASENUCLEOSIDENUCLEOTIDE_AND_NUCLEIC_ACID_METABOLIC_PROCESS               | 1244                | 102                | 0.082  | 0.00E+00 | 0.00E+00    |
| ORGANELLE_ORGANIZATION_AND_BIOGENESIS                                           | 473                 | 40                 | 0.0846 | 0.00E+00 | 0.00E+00    |
| MACROMOLECULE_BIOSYNTHETIC_PROCESS                                              | 321                 | 32                 | 0.0997 | 0.00E+00 | 0.00E+00    |
| BIOSYNTHETIC_PROCESS                                                            | 470                 | 49                 | 0.1043 | 0.00E+00 | 0.00E+00    |
| CELLULAR_COMPONENT_ASSEMBLY                                                     | 298                 | 33                 | 0.1107 | 0.00E+00 | 0.00E+00    |
| MACROMOLECULAR_COMPLEX_ASSEMBLY                                                 | 280                 | 33                 | 0.1179 | 0.00E+00 | 0.00E+00    |
| CATABOLIC_PROCESS                                                               | 225                 | 28                 | 0.1244 | 0.00E+00 | 0.00E+00    |
| CELLULAR_CATABOLIC_PROCESS                                                      | 212                 | 28                 | 0.1321 | 0.00E+00 | 0.00E+00    |
| CELLULAR_BIOSYNTHETIC_PROCESS                                                   | 321                 | 45                 | 0.1402 | 0.00E+00 | 0.00E+00    |
| RNA_PROCESSING                                                                  | 173                 | 28                 | 0.1618 | 0.00E+00 | 0.00E+00    |
| TRANSLATION                                                                     | 180                 | 31                 | 0.1722 | 0.00E+00 | 0.00E+00    |
| DNA_METABOLIC_PROCESS                                                           | 257                 | 27                 | 0.1051 | 1.11E-16 | 4.82E-15    |
| APOPTOSIS_GO                                                                    | 431                 | 32                 | 0.0742 | 2.33E-15 | 9.58E-14    |
| PROGRAMMED_CELL_DEATH                                                           | 432                 | 32                 | 0.0741 | 2.55E-15 | 9.58E-14    |
| RNA_SPLICING                                                                    | 91                  | 17                 | 0.1868 | 2.55E-15 | 9.58E-14    |
| ESTABLISHMENT_OF_CELLULAR_LOCALIZATION                                          | 353                 | 29                 | 0.0822 | 3.66E-15 | 1.31E-13    |
| INTRACELLULAR_TRANSPORT                                                         | 280                 | 26                 | 0.0929 | 5.44E-15 | 1.87E-13    |
| MRNA_METABOLIC_PROCESS                                                          | 84                  | 16                 | 0.1905 | 1.21E-14 | 3.98E-13    |
| CELLULAR_LOCALIZATION                                                           | 371                 | 29                 | 0.0782 | 1.32E-14 | 4.19E-13    |
| PROTEIN_FOLDING                                                                 | 58                  | 14                 | 0.2414 | 1.63E-14 | 4.99E-13    |
| MRNA_PROCESSING_GO_0006397                                                      | 73                  | 15                 | 0.2055 | 2.49E-14 | 7.33E-13    |
| REGULATION_OF_CELLULAR_METABOLIC_PROCESS                                        | 787                 | 40                 | 0.0508 | 2.35E-13 | 6.68E-12    |
| CELL_DEVELOPMENT                                                                | 577                 | 34                 | 0.0589 | 2.59E-13 | 7.13E-12    |
| REGULATION_OF_METABOLIC_PROCESS                                                 | 799                 | 40                 | 0.0501 | 3.79E-13 | 1.01E-11    |
| CARBOXYLIC_ACID_METABOLIC_PROCESS                                               | 178                 | 19                 | 0.1067 | 2.14E-12 | 5.53E-11    |
| ORGANIC_ACID_METABOLIC_PROCESS                                                  | 180                 | 19                 | 0.1056 | 2.62E-12 | 6.55E-11    |
| REGULATION_OF_APOPTOSIS                                                         | 341                 | 25                 | 0.0733 | 3.66E-12 | 8.87E-11    |
| REGULATION_OF_PROGRAMMED_CELL_DEATH                                             | 342                 | 25                 | 0.0731 | 3.90E-12 | 9.19E-11    |
| TRANSCRIPTION                                                                   | 753                 | 37                 | 0.0491 | 5.09E-12 | 1.17E-10    |
| REGULATION_OF_DEVELOPMENTAL_PROCESS                                             | 440                 | 28                 | 0.0636 | 5.59E-12 | 1.25E-10    |
| RESPONSE_TO_STRESS                                                              | 508                 | 30                 | 0.0591 | 6.34E-12 | 1.38E-10    |
| NEGATIVE_REGULATION_OF_CELLULAR_PROCESS                                         | 646                 | 32                 | 0.0495 | 1.17E-10 | 2.46E-09    |
| NEGATIVE_REGULATION_OF_APOPTOSIS                                                | 150                 | 16                 | 0.1067 | 1.19E-10 | 2.46E-09    |
| NEGATIVE_REGULATION_OF_PROGRAMMED_CELL_DEATH                                    | 151                 | 16                 | 0.106  | 1.32E-10 | 2.65E-09    |
| MACROMOLECULE_CATABOLIC_PROCESS                                                 | 137                 | 15                 | 0.1095 | 3.13E-10 | 6.14E-09    |
| NEGATIVE_REGULATION_OF_BIOLOGICAL_PROCESS                                       | 677                 | 32                 | 0.0473 | 3.76E-10 | 7.22E-09    |
| ESTABLISHMENT_OF_PROTEIN_LOCALIZATION                                           | 190                 | 17                 | 0.0895 | 5.03E-10 | 9.42E-09    |
| DNA_REPLICATION                                                                 | 102                 | 13                 | 0.1275 | 7.15E-10 | 1.31E-08    |
| GENERATION_OF_PRECURSOR_METABOLITES_AND_ENERGY                                  | 123                 | 14                 | 0.1138 | 7.28E-10 | 1.31E-08    |
| NEGATIVE_REGULATION_OF_DEVELOPMENTAL_PROCESS                                    | 197                 | 17                 | 0.0863 | 8.80E-10 | 1.54E-08    |
| PROTEIN_RNA_COMPLEX_ASSEMBLY                                                    | 67                  | 11                 | 0.1642 | 9.22E-10 | 1.59E-08    |
| RIBONUCLEOPROTEIN_COMPLEX_BIOGENESIS_AND_ASSEMBLY                               | 86                  | 12                 | 0.1395 | 1.11E-09 | 1.88E-08    |
| NITROGEN_COMPOUND_METABOLIC_PROCESS                                             | 155                 | 15                 | 0.0968 | 1.78E-09 | 2.93E-08    |
| MACROMOLECULE_LOCALIZATION                                                      | 235                 | 18                 | 0.0766 | 1.92E-09 | 3.11E-08    |
| PROTEIN_TRANSPORT                                                               | 157                 | 15                 | 0.0955 | 2.12E-09 | 3.37E-08    |
| CELLULAR_RESPIRATION                                                            | 19                  | 7                  | 0.3684 | 2.39E-09 | 3.65E-08    |
| TRNA_METABOLIC_PROCESS                                                          | 19                  | 7                  | 0.3684 | 2.39E-09 | 3.65E-08    |
| PROTEIN_LOCALIZATION                                                            | 214                 | 17                 | 0.0794 | 3.12E-09 | 4.68E-08    |
| PROTEIN_COMPLEX_ASSEMBLY                                                        | 167                 | 15                 | 0.0898 | 4.97E-09 | 7.32E-08    |
| REGULATION_OF_GENE_EXPRESSION                                                   | 673                 | 30                 | 0.0446 | 5.14E-09 | 7.43E-08    |
| TRANSCRIPTION_DNA_DEPENDENT                                                     | 636                 | 29                 | 0.0456 | 5.63E-09 | 8.00E-08    |
| RNA_BIOSYNTHETIC_PROCESS                                                        | 638                 | 29                 | 0.0455 | 6.03E-09 | 8.43E-08    |
| CELLULAR_COMPONENT_DISASSEMBLY                                                  | 33                  | 8                  | 0.2424 | 7.18E-09 | 9.87E-08    |
| AMINO_ACID_AND_DERIVATIVE_METABOLIC_PROCESS                                     | 101                 | 12                 | 0.1188 | 7.30E-09 | 9.87E-08    |
| REGULATION_OF_CELLULAR_COMPONENT_ORGANIZATION_AND_BIOGENESIS                    | 125                 | 13                 | 0.104  | 8.95E-09 | 1.19E-07    |
| CELLULAR_LIPID_CATABOLIC_PROCESS                                                | 35                  | 8                  | 0.2286 | 1.19E-08 | 1.56E-07    |
| SIGNAL_TRANSDUCTION                                                             | 1634                | 50                 | 0.0306 | 1.71E-08 | 2.21E-07    |
| ALCOHOL_METABOLIC_PROCESS                                                       | 88                  | 11                 | 0.125  | 1.80E-08 | 2.29E-07    |
| ENERGY_DERIVATION_BY_OXIDATION_OF_ORGANIC_COMPOUNDS                             | 37                  | 8                  | 0.2162 | 1.91E-08 | 2.39E-07    |
| LIPID_CATABOLIC_PROCESS                                                         | 38                  | 8                  | 0.2105 | 2.39E-08 | 2.94E-07    |
| ANTI_APOPTOSIS                                                                  | 118                 | 12                 | 0.1017 | 4.29E-08 | 5.21E-07    |
| REGULATION_OF_NUCLEOBASENUCLEOSIDENUCLEOTIDE_AND_NUCLEIC_ACID_METABOLIC_PROCESS | 618                 | 27                 | 0.0437 | 4.53E-08 | 5.41E-07    |
| INTRACELLULAR_PROTEIN_TRANSPORT                                                 | 145                 | 13                 | 0.0897 | 5.36E-08 | 6.31E-07    |
| ESTABLISHMENT_AND_OR_MAINTENANCE_OF_CHROMATIN_ARCHITECTURE                      | 77                  | 10                 | 0.1299 | 5.54E-08 | 6.44E-07    |
| AMINO_ACID_METABOLIC_PROCESS                                                    | 78                  | 10                 | 0.1282 | 6.29E-08 | 7.20E-07    |
| APOPTOTIC_PROGRAM                                                               | 60                  | 9                  | 0.15   | 7.16E-08 | 8.09E-07    |
| CHROMOSOME_ORGANIZATION_AND_BIOGENESIS                                          | 124                 | 12                 | 0.0968 | 7.47E-08 | 8.33E-07    |
| DNA_REPAIR                                                                      | 125                 | 12                 | 0.096  | 8.17E-08 | 8.99E-07    |
| CELLULAR_CARBOHYDRATE_METABOLIC_PROCESS                                         | 126                 | 12                 | 0.0952 | 8.93E-08 | 9.69E-07    |
| CYTOSKELETON_ORGANIZATION_AND_BIOGENESIS                                        | 208                 | 15                 | 0.0721 | 9.45E-08 | 1.01E-06    |
| CARBOHYDRATE_METABOLIC_PROCESS                                                  | 180                 | 14                 | 0.0778 | 9.92E-08 | 1.05E-06    |
| APOPTOTIC_NUCLEAR_CHANGES                                                       | 19                  | 6                  | 0.3158 | 1.01E-07 | 1.05E-06    |
| RESPONSE_TO_DNA_DAMAGE_STIMULUS                                                 | 162                 | 13                 | 0.0802 | 1.97E-07 | 2.03E-06    |
| POSITIVE_REGULATION_OF_BIOLOGICAL_PROCESS                                       | 709                 | 28                 | 0.0395 | 2.04E-07 | 2.08E-06    |
| CELL_PROLIFERATION_GO_0008283                                                   | 513                 | 23                 | 0.0448 | 2.86E-07 | 2.88E-06    |
| AMINE_METABOLIC_PROCESS                                                         | 141                 | 12                 | 0.0851 | 3.07E-07 | 3.05E-06    |
| NUCLEOBASENUCLEOSIDE_AND_NUCLEOTIDE_METABOLIC_PROCESS                           | 52                  | 8                  | 0.1538 | 3.14E-07 | 3.09E-06    |
| BIOPOLYMER_CATABOLIC_PROCESS                                                    | 117                 | 11                 | 0.094  | 3.50E-07 | 3.40E-06    |
| DNA_CATABOLIC_PROCESS                                                           | 23                  | 6                  | 0.2609 | 3.59E-07 | 3.44E-06    |
| DNA_FRAGMENTATION_DURING_APOPTOSIS                                              | 13                  | 5                  | 0.3846 | 3.99E-07 | 3.78E-06    |
| COFACTOR_METABOLIC_PROCESS                                                      | 54                  | 8                  | 0.1481 | 4.25E-07 | 3.98E-06    |
| REGULATION_OF_TRANSCRIPTION                                                     | 566                 | 24                 | 0.0424 | 4.32E-07 | 4.00E-06    |
| NITROGEN_COMPOUND_BIOSYNTHETIC_PROCESS                                          | 26                  | 6                  | 0.2308 | 7.92E-07 | 7.26E-06    |
| RESPONSE_TO_CHEMICAL_STIMULUS                                                   | 314                 | 17                 | 0.0541 | 8.06E-07 | 7.31E-06    |
| AEROBIC_RESPIRATION                                                             | 15                  | 5                  | 0.3333 | 9.11E-07 | 8.17E-06    |
| NUCLEOTIDE_METABOLIC_PROCESS                                                    | 42                  | 7                  | 0.1667 | 9.91E-07 | 8.79E-06    |
| GLUCOSE_METABOLIC_PROCESS                                                       | 28                  | 6                  | 0.2143 | 1.27E-06 | 1.11E-05    |
| CELLULAR_LIPID_METABOLIC_PROCESS                                                | 255                 | 15                 | 0.0588 | 1.28E-06 | 1.11E-05    |
| LIPID_METABOLIC_PROCESS                                                         | 325                 | 17                 | 0.0523 | 1.29E-06 | 1.11E-05    |
| RESPONSE_TO_OXIDATIVE_STRESS                                                    | 46                  | 7                  | 0.1522 | 1.88E-06 | 1.60E-05    |
| NUCLEAR_ORGANIZATION_AND_BIOGENESIS                                             | 30                  | 6                  | 0.2    | 1.96E-06 | 1.65E-05    |
| RESPONSE_TO_ENDOGENOUS_STIMULUS                                                 | 200                 | 13                 | 0.065  | 2.16E-06 | 1.80E-05    |
| POSITIVE_REGULATION_OF_CELLULAR_PROCESS                                         | 668                 | 25                 | 0.0374 | 2.37E-06 | 1.96E-05    |

Extended Table 5

| Gene Set Name                                                                   | # Genes in Gene Set | # Genes in Overlap | p-value  | FDR q-value |
|---------------------------------------------------------------------------------|---------------------|--------------------|----------|-------------|
| TRANSCRIPTION                                                                   | 753                 | 62                 | 0.00E+00 | 0.00E+00    |
| SYSTEM_DEVELOPMENT                                                              | 861                 | 67                 | 0.00E+00 | 0.00E+00    |
| SIGNAL_TRANSDUCTION                                                             | 1634                | 139                | 0.00E+00 | 0.00E+00    |
| PROTEIN_METABOLIC_PROCESS                                                       | 1231                | 82                 | 0.00E+00 | 0.00E+00    |
| NUCLEOBASENUCLEOSIDENUCLEOTIDE_AND_NUCLEIC_ACID_METABOLIC_PROCESS               | 1244                | 82                 | 0.00E+00 | 0.00E+00    |
| MULTICELLULAR_ORGANISMAL_DEVELOPMENT                                            | 1049                | 87                 | 0.00E+00 | 0.00E+00    |
| CELLULAR_PROTEIN_METABOLIC_PROCESS                                              | 1117                | 74                 | 0.00E+00 | 0.00E+00    |
| CELLULAR_MACROMOLECULE_METABOLIC_PROCESS                                        | 1131                | 76                 | 0.00E+00 | 0.00E+00    |
| CELL_SURFACE_RECEPTOR_LINKED_SIGNAL_TRANSDUCTION_GO_0007268                     | 641                 | 54                 | 0.00E+00 | 0.00E+00    |
| CELL_PROLIFERATION_GO_0008283                                                   | 513                 | 48                 | 0.00E+00 | 0.00E+00    |
| BIOPOLYMER_METABOLIC_PROCESS                                                    | 1684                | 108                | 0.00E+00 | 0.00E+00    |
| ANATOMICAL_STRUCTURE_DEVELOPMENT                                                | 1013                | 77                 | 0.00E+00 | 0.00E+00    |
| TRANSCRIPTION_DNA_DEPENDENT                                                     | 636                 | 52                 | 1.11E-16 | 1.57E-14    |
| REGULATION_OF_GENE_EXPRESSION                                                   | 673                 | 54                 | 1.11E-16 | 1.57E-14    |
| RNA_BIOSYNTHETIC_PROCESS                                                        | 638                 | 52                 | 2.22E-16 | 2.97E-14    |
| REGULATION_OF_CELLULAR_METABOLIC_PROCESS                                        | 787                 | 58                 | 3.33E-16 | 4.23E-14    |
| RNA_METABOLIC_PROCESS                                                           | 841                 | 60                 | 4.44E-16 | 5.37E-14    |
| REGULATION_OF_METABOLIC_PROCESS                                                 | 799                 | 58                 | 6.66E-16 | 7.69E-14    |
| INTRACELLULAR_SIGNALING_CASCADE                                                 | 667                 | 52                 | 1.11E-15 | 1.23E-13    |
| REGULATION_OF_TRANSCRIPTION                                                     | 566                 | 46                 | 1.15E-14 | 1.22E-12    |
| ORGAN_DEVELOPMENT                                                               | 571                 | 45                 | 6.73E-14 | 6.47E-12    |
| REGULATION_OF_NUCLEOBASENUCLEOSIDENUCLEOTIDE_AND_NUCLEIC_ACID_METABOLIC_PROCESS | 618                 | 47                 | 6.87E-14 | 6.47E-12    |
| BIOPOLYMER_MODIFICATION                                                         | 650                 | 48                 | 1.10E-13 | 1.00E-11    |
| NEGATIVE_REGULATION_OF_BIOLOGICAL_PROCESS                                       | 677                 | 49                 | 1.29E-13 | 1.13E-11    |
| ENZYME_LINKED_RECEPTOR_PROTEIN_SIGNALING_PATHWAY                                | 140                 | 22                 | 2.76E-13 | 2.33E-11    |
| ENZYME_REGULATOR_ACTIVITY                                                       | 323                 | 32                 | 6.95E-13 | 5.70E-11    |
| NEGATIVE_REGULATION_OF_CELLULAR_PROCESS                                         | 646                 | 46                 | 1.29E-12 | 1.02E-10    |
| PROTEIN_MODIFICATION_PROCESS                                                    | 631                 | 45                 | 2.15E-12 | 1.66E-10    |
| RECEPTOR_ACTIVITY                                                               | 583                 | 43                 | 2.22E-12 | 1.66E-10    |
| CELL_CELL_SIGNALING                                                             | 404                 | 35                 | 2.89E-12 | 2.10E-10    |
| TRANSCRIPTION_FROM_RNA_POLYMERASE_II_PROMOTER                                   | 457                 | 37                 | 5.17E-12 | 3.55E-10    |
| DNA_BINDING                                                                     | 602                 | 42                 | 2.34E-11 | 1.57E-09    |
| REGULATION_OF_TRANSCRIPTION_DNA_DEPENDENT                                       | 461                 | 36                 | 2.79E-11 | 1.77E-09    |
| PID_PDGFRTK_PATHWAY                                                             | 129                 | 19                 | 3.69E-11 | 2.29E-09    |
| POSITIVE_REGULATION_OF_CELLULAR_PROCESS                                         | 668                 | 44                 | 5.08E-11 | 2.94E-09    |
| REGULATION_OF_RNA_METABOLIC_PROCESS                                             | 471                 | 36                 | 5.10E-11 | 2.94E-09    |
| POST_TRANSLATIONAL_PROTEIN_MODIFICATION                                         | 476                 | 36                 | 6.85E-11 | 3.87E-09    |
| POSITIVE_REGULATION_OF_BIOLOGICAL_PROCESS                                       | 709                 | 45                 | 1.02E-10 | 5.66E-09    |
| GTPASE_REGULATOR_ACTIVITY                                                       | 125                 | 18                 | 1.77E-10 | 9.54E-09    |
| IMMUNE_RESPONSE                                                                 | 235                 | 24                 | 2.76E-10 | 1.46E-08    |
| NERVOUS_SYSTEM_DEVELOPMENT                                                      | 385                 | 31                 | 3.12E-10 | 1.62E-08    |
| TRANSCRIPTION_FACTOR_ACTIVITY                                                   | 354                 | 29                 | 7.77E-10 | 3.95E-08    |
| REGULATION_OF_CELL_PROLIFERATION                                                | 308                 | 26                 | 3.09E-09 | 1.54E-07    |
| IMMUNE_SYSTEM_PROCESS                                                           | 332                 | 27                 | 3.47E-09 | 1.69E-07    |
| RESPONSE_TO_VIRUS                                                               | 50                  | 11                 | 6.30E-09 | 3.02E-07    |
| ANATOMICAL_STRUCTURE_MORPHOGENESIS                                              | 376                 | 28                 | 1.23E-08 | 5.69E-07    |
| RECEPTOR_BINDING                                                                | 377                 | 28                 | 1.30E-08 | 5.81E-07    |
| REGULATION_OF_SIGNAL_TRANSDUCTION                                               | 222                 | 21                 | 1.39E-08 | 6.08E-07    |
| MULTI_ORGANISM_PROCESS                                                          | 165                 | 18                 | 1.64E-08 | 7.06E-07    |
| RESPONSE_TO_OTHER_ORGANISM                                                      | 83                  | 13                 | 2.11E-08 | 8.81E-07    |
| NUCLEOSIDE_TRIPHOSPHATASE_ACTIVITY                                              | 212                 | 20                 | 3.19E-08 | 1.29E-06    |
| GUANYL_NUCLEOTIDE_EXCHANGE_FACTOR_ACTIVITY                                      | 46                  | 10                 | 3.50E-08 | 1.37E-06    |
| PID_P53_DOWNSTREAM_PATHWAY                                                      | 137                 | 16                 | 3.87E-08 | 1.49E-06    |
| RESPONSE_TO_BIOTIC_STIMULUS                                                     | 120                 | 15                 | 4.10E-08 | 1.55E-06    |
| TISSUE_DEVELOPMENT                                                              | 138                 | 16                 | 4.29E-08 | 1.60E-06    |
| TRANSFERASE_ACTIVITY_TRANSFERRING_PHOSPHORUS_CONTAINING                         | 424                 | 29                 | 4.38E-08 | 1.61E-06    |
| TRANSFORMING_GROWTH_FACTOR_BETA_RECEPTOR_SIGNALING_PATHWAY                      | 36                  | 9                  | 4.60E-08 | 1.67E-06    |
| PID_ERBB1_DOWNSTREAM_PATHWAY                                                    | 105                 | 14                 | 5.05E-08 | 1.81E-06    |
| PYROPHOSPHATASE_ACTIVITY                                                        | 226                 | 20                 | 9.23E-08 | 3.21E-06    |
| PROTEIN_KINASE_CASCADE                                                          | 293                 | 23                 | 9.39E-08 | 3.23E-06    |
| HYDROLASE_ACTIVITY_ACTING_ON_ACID_ANHYDRIDES                                    | 228                 | 20                 | 1.07E-07 | 3.56E-06    |
| SUBSTRATE_SPECIFIC_TRANSPORTER_ACTIVITY                                         | 392                 | 27                 | 1.10E-07 | 3.63E-06    |
| CELL_DEVELOPMENT                                                                | 577                 | 34                 | 1.16E-07 | 3.79E-06    |
| RESPONSE_TO_STRESS                                                              | 508                 | 31                 | 1.95E-07 | 6.20E-06    |
| ESTABLISHMENT_OF_LOCALIZATION                                                   | 870                 | 43                 | 3.57E-07 | 1.11E-05    |
| DEFENSE_RESPONSE                                                                | 270                 | 21                 | 3.91E-07 | 1.19E-05    |
| TRANSMEMBRANE_RECEPTOR_ACTIVITY                                                 | 418                 | 27                 | 3.94E-07 | 1.19E-05    |
| PID_EPO_PATHWAY                                                                 | 34                  | 8                  | 4.34E-07 | 1.29E-05    |
| KINASE_ACTIVITY                                                                 | 369                 | 25                 | 4.37E-07 | 1.29E-05    |
| TRANSMEMBRANE_RECEPTOR_PROTEIN_SERINE_THREONINE_KINASE                          | 47                  | 9                  | 5.41E-07 | 1.56E-05    |
| PID_IL6_PATHWAY                                                                 | 47                  | 9                  | 5.41E-07 | 1.56E-05    |
| REGULATION_OF_MOLECULAR_FUNCTION                                                | 324                 | 23                 | 5.59E-07 | 1.60E-05    |
| TRANSPORT                                                                       | 795                 | 40                 | 5.83E-07 | 1.64E-05    |
| MOLECULAR_ADAPTOR_ACTIVITY                                                      | 49                  | 9                  | 7.86E-07 | 2.17E-05    |
| PID_GMCSF_PATHWAY                                                               | 37                  | 8                  | 8.72E-07 | 2.36E-05    |
| ACTIN_FILAMENT_BASED_PROCESS                                                    | 115                 | 13                 | 1.05E-06 | 2.78E-05    |
| REGULATION_OF_DEVELOPMENTAL_PROCESS                                             | 440                 | 27                 | 1.06E-06 | 2.78E-05    |
| RESPONSE_TO_CHEMICAL_STIMULUS                                                   | 314                 | 22                 | 1.22E-06 | 3.16E-05    |
| PID_SMAD2_3_NUCLEAR_PATHWAY                                                     | 82                  | 11                 | 1.28E-06 | 3.28E-05    |
| NEGATIVE_REGULATION_OF_CELL_PROLIFERATION                                       | 156                 | 15                 | 1.29E-06 | 3.28E-05    |

Extended Table 6

| Gene Set Name                                                                            | # Genes in | # Genes in | p-value  | FDR q-value |
|------------------------------------------------------------------------------------------|------------|------------|----------|-------------|
| ANATOMICAL_STRUCTURE_DEVELOPMENT                                                         | 1013       | 59         | 0.00E+00 | 0.00E+00    |
| INTRACELLULAR_SIGNALING_CASCADE                                                          | 667        | 47         | 0.00E+00 | 0.00E+00    |
| NEGATIVE_REGULATION_OF_BIOLOGICAL_PROCESS                                                | 677        | 47         | 0.00E+00 | 0.00E+00    |
| NEGATIVE_REGULATION_OF_CELLULAR_PROCESS                                                  | 646        | 46         | 0.00E+00 | 0.00E+00    |
| SIGNAL_TRANSDUCTION                                                                      | 1634       | 89         | 0.00E+00 | 0.00E+00    |
| MULTICELLULAR_ORGANISMAL_DEVELOPMENT                                                     | 1049       | 57         | 1.11E-16 | 4.03E-14    |
| SYSTEM_DEVELOPMENT                                                                       | 861        | 50         | 1.11E-16 | 4.03E-14    |
| CELL_DEVELOPMENT                                                                         | 577        | 40         | 4.44E-16 | 1.41E-13    |
| BIOPOLYMER_METABOLIC_PROCESS                                                             | 1684       | 68         | 3.23E-14 | 7.85E-12    |
| PROTEIN_KINASE_CASCADE                                                                   | 293        | 27         | 3.40E-14 | 7.85E-12    |
| ORGAN_DEVELOPMENT                                                                        | 571        | 36         | 2.29E-13 | 4.85E-11    |
| REGULATION_OF_DEVELOPMENTAL_PROCESS                                                      | 440        | 31         | 6.13E-13 | 1.20E-10    |
| ENZYME_REGULATOR_ACTIVITY                                                                | 323        | 26         | 2.30E-12 | 4.17E-10    |
| TRANSCRIPTION                                                                            | 753        | 40         | 2.46E-12 | 4.17E-10    |
| KINASE_ACTIVITY                                                                          | 369        | 27         | 8.04E-12 | 1.28E-09    |
| REGULATION_OF_TRANSCRIPTION                                                              | 566        | 33         | 1.87E-11 | 2.79E-09    |
| PHOSPHOTRANSFERASE_ACTIVITY_ALCOHOL_GROUP_AS_ACCEPTOR                                    | 334        | 25         | 2.94E-11 | 4.15E-09    |
| TRANSFERASE_ACTIVITY_TRANSFERRING_PHOSPHORUS_CONTAINING_GROUPS                           | 424        | 28         | 3.70E-11 | 4.95E-09    |
| REGULATION_OF_NUCLEOBASENUCLEOSIDENUCLEOTIDE_AND_NUCLEIC_ACID_METABOLIC_PROCESS          | 618        | 34         | 4.39E-11 | 5.57E-09    |
| PROGRAMMED_CELL_DEATH                                                                    | 432        | 28         | 5.70E-11 | 6.90E-09    |
| PROTEIN_METABOLIC_PROCESS                                                                | 1231       | 50         | 7.88E-11 | 9.10E-09    |
| POSITIVE_REGULATION_OF_CELLULAR_PROCESS                                                  | 668        | 35         | 8.54E-11 | 9.44E-09    |
| REGULATION_OF_MOLECULAR_FUNCTION                                                         | 324        | 24         | 9.05E-11 | 9.54E-09    |
| TRANSCRIPTION_DNA_DEPENDENT                                                              | 636        | 34         | 9.39E-11 | 9.54E-09    |
| RNA_BIOSYNTHETIC_PROCESS                                                                 | 638        | 34         | 1.02E-10 | 9.60E-09    |
| POST_TRANSLATIONAL_PROTEIN_MODIFICATION                                                  | 476        | 29         | 1.12E-10 | 1.02E-08    |
| REGULATION_OF_CATALYTIC_ACTIVITY                                                         | 276        | 22         | 1.36E-10 | 1.17E-08    |
| REGULATION_OF_CELLULAR_METABOLIC_PROCESS                                                 | 787        | 38         | 1.38E-10 | 1.17E-08    |
| REGULATION_OF_METABOLIC_PROCESS                                                          | 799        | 38         | 2.12E-10 | 1.74E-08    |
| APOPTOSIS_GO                                                                             | 431        | 27         | 2.67E-10 | 2.10E-08    |
| REGULATION_OF_PROGRAMMED_CELL_DEATH                                                      | 342        | 24         | 2.73E-10 | 2.10E-08    |
| NUCLEOBASENUCLEOSIDENUCLEOTIDE_AND_NUCLEIC_ACID_METABOLIC_PROCESS                        | 1244       | 49         | 3.44E-10 | 2.57E-08    |
| ANATOMICAL_STRUCTURE_MORPHOGENESIS                                                       | 376        | 25         | 3.59E-10 | 2.61E-08    |
| DNA_BINDING                                                                              | 602        | 32         | 3.87E-10 | 2.73E-08    |
| POSITIVE_REGULATION_OF_BIOLOGICAL_PROCESS                                                | 709        | 35         | 4.18E-10 | 2.87E-08    |
| ESTABLISHMENT_OF_LOCALIZATION                                                            | 870        | 39         | 6.63E-10 | 4.34E-08    |
| TRANSPORT                                                                                | 795        | 37         | 6.65E-10 | 4.34E-08    |
| CELLULAR_PROTEIN_METABOLIC_PROCESS                                                       | 1117       | 45         | 9.26E-10 | 5.88E-08    |
| PROTEIN_AMINO_ACID_PHOSPHORYLATION                                                       | 279        | 21         | 1.01E-09 | 6.12E-08    |
| REGULATION_OF_TRANSCRIPTION_DNA_DEPENDENT                                                | 461        | 27         | 1.16E-09 | 6.87E-08    |
| CELLULAR_MACROMOLECULE_METABOLIC_PROCESS                                                 | 1131       | 45         | 1.36E-09 | 7.79E-08    |
| REGULATION_OF_APOPTOSIS                                                                  | 341        | 23         | 1.38E-09 | 7.79E-08    |
| PHOSPHORYLATION                                                                          | 313        | 22         | 1.46E-09 | 8.03E-08    |
| PROTEIN_KINASE_ACTIVITY                                                                  | 285        | 21         | 1.48E-09 | 8.03E-08    |
| REGULATION_OF_GENE_EXPRESSION                                                            | 673        | 33         | 1.57E-09 | 8.29E-08    |
| REGULATION_OF_RNA_METABOLIC_PROCESS                                                      | 471        | 27         | 1.84E-09 | 9.37E-08    |
| PROTEIN_MODIFICATION_PROCESS                                                             | 631        | 31         | 4.70E-09 | 2.34E-07    |
| REGULATION_OF_SIGNAL_TRANSDUCTION                                                        | 222        | 18         | 4.92E-09 | 2.40E-07    |
| NEGATIVE_REGULATION_OF_DEVELOPMENTAL_PROCESS                                             | 197        | 17         | 5.14E-09 | 2.47E-07    |
| TRANSCRIPTION_REPRESSOR_ACTIVITY                                                         | 152        | 15         | 6.63E-09 | 3.06E-07    |
| RESPONSE_TO_EXTERNAL_STIMULUS                                                            | 312        | 21         | 7.40E-09 | 3.36E-07    |
| REGULATION_OF_PROTEIN_KINASE_ACTIVITY                                                    | 155        | 15         | 8.67E-09 | 3.86E-07    |
| BIOPOLYMER_MODIFICATION                                                                  | 650        | 31         | 9.34E-09 | 4.09E-07    |
| RNA_METABOLIC_PROCESS                                                                    | 841        | 36         | 9.97E-09 | 4.29E-07    |
| REGULATION_OF_KINASE_ACTIVITY                                                            | 157        | 15         | 1.03E-08 | 4.37E-07    |
| CYTOSKELETAL_PROTEIN_BINDING                                                             | 159        | 15         | 1.23E-08 | 4.95E-07    |
| REGULATION_OF_TRANSFERASE_ACTIVITY                                                       | 161        | 15         | 1.45E-08 | 5.77E-07    |
| REGULATION_OF_BIOLOGICAL_QUALITY                                                         | 419        | 24         | 1.48E-08 | 5.80E-07    |
| NEGATIVE_REGULATION_OF_TRANSCRIPTION                                                     | 188        | 16         | 1.76E-08 | 6.68E-07    |
| POSITIVE_REGULATION_OF_CATALYTIC_ACTIVITY                                                | 165        | 15         | 2.03E-08 | 7.57E-07    |
| GTPASE_REGULATOR_ACTIVITY                                                                | 125        | 13         | 3.59E-08 | 1.30E-06    |
| RESPONSE_TO_STRESS                                                                       | 508        | 26         | 3.66E-08 | 1.31E-06    |
| MAPKKK_CASCADE_GO_0000165                                                                | 104        | 12         | 3.74E-08 | 1.32E-06    |
| RECEPTOR_ACTIVITY                                                                        | 583        | 28         | 4.20E-08 | 1.46E-06    |
| REGULATION_OF_MAP_KINASE_ACTIVITY                                                        | 67         | 10         | 4.26E-08 | 1.46E-06    |
| CALMODULIN_BINDING                                                                       | 25         | 7          | 4.79E-08 | 1.62E-06    |
| TRANSCRIPTION_FACTOR_ACTIVITY                                                            | 354        | 21         | 6.51E-08 | 2.15E-06    |
| CELL_SURFACE_RECEPTOR_LINKED_SIGNAL_TRANSDUCTION_GO_0007166                              | 641        | 29         | 8.62E-08 | 2.81E-06    |
| NEGATIVE_REGULATION_OF_NUCLEOBASENUCLEOSIDENUCLEOTIDE_AND_NUCLEIC_ACID_METABOLIC_PROCESS | 211        | 16         | 8.87E-08 | 2.85E-06    |

|                                                                  |     |    |          |          |
|------------------------------------------------------------------|-----|----|----------|----------|
| SULFOTRANSFERASE_ACTIVITY                                        | 28  | 7  | 1.14E-07 | 3.61E-06 |
| ACTIN_BINDING                                                    | 76  | 10 | 1.46E-07 | 4.42E-06 |
| CELL_PROLIFERATION_GO_0008283                                    | 513 | 25 | 1.69E-07 | 4.99E-06 |
| TRANSMEMBRANE_TRANSPORTER_ACTIVITY                               | 375 | 21 | 1.71E-07 | 4.99E-06 |
| RESPONSE_TO_CHEMICAL_STIMULUS                                    | 314 | 19 | 2.02E-07 | 5.83E-06 |
| NERVOUS_SYSTEM_DEVELOPMENT                                       | 385 | 21 | 2.64E-07 | 7.53E-06 |
| TRANSFERASE_ACTIVITY_TRANSFERRING_SULFUR_CONTAINING_GROUPS       | 32  | 7  | 3.07E-07 | 8.57E-06 |
| TRANSMEMBRANE_RECEPTOR_PROTEIN_TYROSINE_KINASE_SIGNALING_PATHWAY | 83  | 10 | 3.40E-07 | 9.29E-06 |
| PID_HIF1_TFPATHWAY                                               | 66  | 9  | 4.51E-07 | 1.21E-05 |
| POSITIVE_REGULATION_OF_TRANSFERASE_ACTIVITY                      | 86  | 10 | 4.76E-07 | 1.26E-05 |
| POSITIVE_REGULATION_OF_DEVELOPMENTAL_PROCESS                     | 218 | 15 | 7.73E-07 | 1.99E-05 |
| PID_P53DOWNSTREAMPATHWAY                                         | 137 | 12 | 7.83E-07 | 1.99E-05 |

Extended Table 7

| Database_Pathway Annotation                            | # Genes in Gene Set | # Genes in O | p-value  | FDR q-value |
|--------------------------------------------------------|---------------------|--------------|----------|-------------|
| <b><i>Nudix Dependent Genes</i></b>                    |                     |              |          |             |
| REACTOME_IMMUNE_SYSTEM                                 | 933                 | 92           | 0.00E+00 | 0.00E+00    |
| REACTOME_CYTOKINE_SIGNALING_IN_IMMUNE_SYSTEM           | 270                 | 49           | 0.00E+00 | 0.00E+00    |
| REACTOME_INTERFERON_SIGNALING                          | 159                 | 38           | 0.00E+00 | 0.00E+00    |
| REACTOME_INTERFERON_ALPHA_BETA_SIGNALING               | 64                  | 24           | 0.00E+00 | 0.00E+00    |
| KEGG_PATHWAYS_IN_CANCER                                | 328                 | 34           | 3.57E-14 | 3.63E-12    |
| REACTOME_INTERFERON_GAMMA_SIGNALING                    | 63                  | 15           | 3.24E-12 | 2.28E-10    |
| KEGG_CYTOKINE_CYTOKINE_RECEPTOR_INTERACTION            | 267                 | 27           | 2.69E-11 | 1.75E-09    |
| REACTOME_ADAPTIVE_IMMUNE_SYSTEM                        | 539                 | 39           | 4.15E-11 | 2.51E-09    |
| REACTOME_DEVELOPMENTAL_BIOLOGY                         | 396                 | 29           | 9.85E-09 | 4.63E-07    |
| REACTOME_ANTIVIRAL_MECHANISM_BY_IFN_STIMULATED_GENES   | 66                  | 12           | 1.29E-08 | 5.81E-07    |
| KEGG_MAPK_SIGNALING_PATHWAY                            | 267                 | 23           | 1.70E-08 | 7.20E-07    |
| REACTOME_AXON_GUIDANCE                                 | 251                 | 22           | 2.53E-08 | 1.04E-06    |
| KEGG_TOLL_LIKE_RECEPTOR_SIGNALING_PATHWAY              | 102                 | 14           | 3.47E-08 | 1.37E-06    |
| REACTOME_TRANSMEMBRANE_TRANSPORT_OF_SMALL_MOLECULES    | 413                 | 28           | 8.95E-08 | 3.16E-06    |
| REACTOME_HEMOSTASIS                                    | 466                 | 30           | 9.75E-08 | 3.30E-06    |
| REACTOME_INNATE_IMMUNE_SYSTEM                          | 279                 | 22           | 1.64E-07 | 5.28E-06    |
| REACTOME_SIGNALING_BY_FGFR_MUTANTS                     | 44                  | 9            | 2.98E-07 | 9.35E-06    |
| KEGG_CHEMOKINE_SIGNALING_PATHWAY                       | 190                 | 17           | 7.16E-07 | 2.00E-05    |
| KEGG_FC_EPSILON_RI_SIGNALING_PATHWAY                   | 79                  | 11           | 8.73E-07 | 2.36E-05    |
| KEGG_REGULATION_OF_ACTIN_CYTOSKELETON                  | 216                 | 18           | 9.65E-07 | 2.58E-05    |
| <b><i>Nudix Independent Genes</i></b>                  |                     |              |          |             |
| KEGG_PATHWAYS_IN_CANCER                                | 328                 | 30           | 1.55E-15 | 4.39E-13    |
| REACTOME_SIGNALING_BY_RHO_GTPASES                      | 113                 | 15           | 1.01E-10 | 9.60E-09    |
| REACTOME_SIGNALING_BY_GPCR                             | 920                 | 40           | 9.59E-10 | 5.94E-08    |
| REACTOME_PLATELET_ACTIVATION_SIGNALING_AND_AGGREGATION | 208                 | 18           | 1.75E-09 | 9.06E-08    |
| KEGG_PROSTATE_CANCER                                   | 89                  | 12           | 6.25E-09 | 2.94E-07    |
| REACTOME_TRANSMEMBRANE_TRANSPORT_OF_SMALL_MOLECULES    | 413                 | 24           | 1.13E-08 | 4.69E-07    |
| KEGG_ENDOCYTOSIS                                       | 183                 | 16           | 1.20E-08 | 4.92E-07    |
| KEGG_MAPK_SIGNALING_PATHWAY                            | 267                 | 19           | 1.57E-08 | 6.03E-07    |
| REACTOME_HEMOSTASIS                                    | 466                 | 25           | 2.70E-08 | 9.94E-07    |
| KEGG_AXON_GUIDANCE                                     | 129                 | 13           | 5.23E-08 | 1.75E-06    |
| KEGG_REGULATION_OF_ACTIN_CYTOSKELETON                  | 216                 | 16           | 1.22E-07 | 3.84E-06    |
| REACTOME_SIGNALLING_BY_NGF                             | 217                 | 16           | 1.30E-07 | 4.04E-06    |
| KEGG_ALDOSTERONE_REGULATED_SODIUM_REABSORPTION         | 42                  | 8            | 1.36E-07 | 4.17E-06    |
| REACTOME_NRAGE_SIGNALS_DEATH_THROUGH_JNK               | 43                  | 8            | 1.65E-07 | 4.94E-06    |
| KEGG_FOCAL_ADHESION                                    | 201                 | 15           | 2.74E-07 | 7.75E-06    |
| KEGG_WNT_SIGNALING_PATHWAY                             | 151                 | 13           | 3.34E-07 | 9.21E-06    |
| KEGG_CYTOKINE_CYTOKINE_RECEPTOR_INTERACTION            | 267                 | 17           | 4.32E-07 | 1.17E-05    |
| KEGG_ADIPOCYTOKINE_SIGNALING_PATHWAY                   | 67                  | 9            | 5.14E-07 | 1.35E-05    |
| KEGG_PANCREATIC_CANCER                                 | 70                  | 9            | 7.53E-07 | 1.95E-05    |
